# Supplementary material for: Chronic Hepatitis B stigma in Ghana: a qualitative study with patients and providers
Source: PubMed Central journal article supplement — BMJ Open. 2019 Jun 27;9(6):e025503. doi: 10.1136/bmjopen-2018-025503 (PMC6597648; doi:10.1136/bmjopen-2018-025503), 2019-06-27
Supplement: bmjopen-2018-025503.draft_revisions.pdf [file bmjopen-2018-025503.draft_revisions.pdf]

# BMJ Open

BMJ Open is committed to open peer review. As part of this commitment we make the peer review history of every article we publish publicly available.

When an article is published we post the peer reviewers' comments and the authors' responses online. We also post the versions of the paper that were used during peer review. These are the versions that the peer review comments apply to.

The versions of the paper that follow are the versions that were submitted during the peer review process. They are not the versions of record or the final published versions. They should not be cited or distributed as the published version of this manuscript.

BMJ Open is an open access journal and the full, final, typeset and author-corrected version of record of the manuscript is available on our site with no access controls, subscription charges or pay-per-view fees (<http://bmjopen.bmj.com>).

If you have any questions on BMJ Open's open peer review process please email [info.bmjopen@bmj.com](mailto:info.bmjopen@bmj.com)

# BMJ Open

## The challenge of stigma among people with hepatitis B in Ghana: a qualitative study

|                               |                                                                                                                                                                                                                                                                                      |
|-------------------------------|--------------------------------------------------------------------------------------------------------------------------------------------------------------------------------------------------------------------------------------------------------------------------------------|
| Journal:                      | <i>BMJ Open</i>                                                                                                                                                                                                                                                                      |
| Manuscript ID                 | bmjopen-2018-025503                                                                                                                                                                                                                                                                  |
| Article Type:                 | Research                                                                                                                                                                                                                                                                             |
| Date Submitted by the Author: | 20-Jul-2018                                                                                                                                                                                                                                                                          |
| Complete List of Authors:     | Adjei, Charles; University of Ghana, Community Health Nursing Department<br>Stutterheim, Sarah; Maastricht University, Department of Work and Social Psychology<br>Naab, Florence; University of Ghana, Department of Maternal and Child Health<br>Ruiter, R; Maastricht University, |
| Keywords:                     | Hepatitis B, Stigma, Challenge, Ghana, Qualitative study                                                                                                                                                                                                                             |
|                               |                                                                                                                                                                                                                                                                                      |

SCHOLARONE™  
Manuscripts

Peer Review Only

## The challenge of stigma among people with hepatitis B in Ghana: a qualitative study

Charles Ampong Adjei - **Corresponding Author**  
(PhD student, Maastricht University, The Netherlands)  
Department of Community Health Nursing  
School of Nursing  
College of Health Sciences  
University of Ghana  
chadjei@ug.edu.gh

Dr. Sarah E. Stutterheim  
Department of Work and Social Psychology  
Maastricht University, The Netherlands  
Email: s.stutterheim@maastrichtuniversity.nl

Dr. Florence Naab  
Department of Maternal and Child Health  
School of Nursing  
College of health Sciences  
University of Ghana  
+23324522332  
fnaab@ug.edu.gh

Prof. Dr. Robert A.C. Ruiter  
Department of Work and Social Psychology  
Maastricht University, The Netherlands  
Email: r.ruiter@maastrichtuniversity.nl

### ABSTRACT

**Objective:** This study explored the perspectives of people with hepatitis B and healthcare providers on the beliefs contributing to hepatitis B stigma in Northern and Southern Ghana and the ways in which hepatitis B stigma manifests.

**Design:** The study used an exploratory qualitative design with a purposive sampling technique. Face-to-face interviews and focus group discussions were conducted. Data were processed using QSR Nvivo version 10.0 and analysed using content analysis.

**Settings:** Participants were recruited from one tertiary and one regional hospital in Ghana.

**Participants:** Overall, 18 people with hepatitis B and 47 healthcare providers (physicians, nurses, and midwives) between the ages of 21 and 57 years participated in the study.

**Results:** The findings of the study showed that people with hepatitis B are faced with stigma in their socio-cultural context and the healthcare environment. Three main beliefs underlying stigma were found: (1) the belief that hepatitis B is highly contagious; (2) the belief that hepatitis B is very severe; and (3) the belief that hepatitis B is caused by curses. Stigmatisation manifested as avoidance, isolation, and physical distance. Also, in healthcare

1  
2  
3 settings, excessive cautiousness, task-shifting, procedure avoidance, breaches of  
4 confidentiality, and silence by healthcare providers were reported.  
5

6 **Conclusions:** Implementation of programmes that increase public awareness about hepatitis  
7 B transmission are needed in the study settings. Capacity training of healthcare providers on  
8 epidemiology of hepatitis B is very crucial. Also, effective theory and evidence-based stigma  
9 reduction interventions are recommended.  
10

11 **Key words:** Stigma, challenge, hepatitis B, infection, Ghana.  
12  
13

#### 14 **Strengths and limitations of this study**

- 15  
16 ➤ This study is the first to document hepatitis B stigma in Ghana. The outcome of this  
17 study paves the way for future studies to measure quantitatively the extent of hepatitis  
18 B stigma in the study context.
- 19  
20  
21 ➤ Triangulation of the data across people with hepatitis B and different categories of  
22 healthcare providers (physicians, nurses, and midwives) added richness to the  
23 findings. Also, the verbatim presentation of participants' views is a strength of this  
24 study.
- 25  
26  
27 ➤ The findings are limited by the small sample size and therefore one must be cautious  
28 in generalising these findings to the entire population.
- 29  
30  
31 ➤ We recognise the possibility of recall bias. However, this was reduced to some extent,  
32 by asking follow-up questions to confirm participant's experiences.  
33

#### 34 **INTRODUCTION**

35  
36 Hepatitis B viral (HBV) infection remains a public health challenge affecting approximately  
37 248 million people worldwide.<sup>1</sup> Globally, about 887,000 deaths attributable to complications  
38 of hepatitis B (i.e. hepatocellular carcinoma and cirrhosis) were recorded in 2015.<sup>2</sup> Sub-  
39 Saharan Africa is disproportionately affected<sup>2</sup> as evidenced by the high HBV prevalence in  
40 the region.<sup>3-6</sup>  
41  
42

43  
44 Within the Ghanaian context, several studies have estimated hepatitis B prevalence above  
45 8%.<sup>3 7-12</sup> In fact, the most recent prevalence estimate of hepatitis B in Ghana is 12.3%.<sup>3</sup> HBV  
46 transmission occurs through several means.<sup>1 13</sup> In high endemic countries such as Ghana,  
47 hepatitis B is predominantly transmitted perinatally.<sup>13</sup> Other practices, including but not  
48 limited to, unsafe injections, blood transfusions, dialysis, needle stick injuries, and intimate  
49 non-sexual contact are postulated as a vehicle for HBV transmission.<sup>13</sup> Perhaps, challenges  
50 such as the high cost of testing and treatment, poor referral systems, a lack of HBV  
51 management guidelines, and inadequate infrastructure for screening contribute to the high  
52 prevalence of hepatitis B in developing countries, including Ghana.<sup>14-16</sup>  
53  
54  
55  
56  
57  
58  
59  
60

1  
2  
3 Generally, diseases with some risk of transmission are associated with stigma.<sup>17 18</sup> This is well  
4 reported for conditions such as tuberculosis, HIV, and mental illnesses.<sup>19-22</sup> Similarly, people  
5 with hepatitis B (PWHB) are likely to be stigmatised.<sup>23-29</sup> Stigmatisation is a socially and  
6 culturally constituted process whereby a person is first labelled as different and then  
7 devalued, leading to status loss and discrimination.<sup>30 31</sup> Link and Phelan<sup>31</sup> outlined three main  
8 motivations for stigmatisation namely: exploitation and domination (keeping people down),  
9 enforcement of social norms (keeping people in), and avoidance of diseases (keeping people  
10 away). Because hepatitis B is an infectious disease, disease avoidance as a motivation for  
11 stigmatisation is likely. This is supported by evidence from Canada and Pakistan showing  
12 that PWHB experience diverse degrees of stigma because of the perceived infectiousness of  
13 HBV.<sup>32-33</sup> Stigmatisation may also be motivated by a desire to enforce social norms as  
14 hepatitis B has been reported to be considered the consequence of promiscuous behaviour.<sup>29</sup>  
15  
16  
17  
18  
19  
20  
21  
22  
23  
24  
25  
26  
27  
28  
29  
30  
31  
32  
33  
34  
35  
36  
37  
38  
39  
40  
41  
42  
43  
44  
45  
46  
47  
48  
49  
50  
51  
52  
53  
54  
55  
56  
57  
58  
59  
60

<sup>34 35</sup> Alongside, there is data showing ignorance about HBV routes of transmission and how that ignorance contributes to hepatitis B stigma.<sup>36</sup>

The stigmatisation of PWHB manifests in many ways. Previous studies conducted outside of Ghana have reported social exclusion, problems with close relations including friends and families, and loss of employment as some of the ways in which hepatitis B stigma presents.<sup>33 35-37</sup> Hepatitis B stigmatisation also occurs across a number of settings and contexts, including health care settings.<sup>38 39</sup> For example, Wada and colleagues<sup>38</sup> found that some healthcare providers in Japan were reluctant to care for clients with hepatitis B due to fear of infection.

The stigmatisation of PWHB has many consequences. It has been found to create an environment of secrecy and denial, can lead to depression, and can be a barrier to health care seeking, including screening and treatment.<sup>28 32 39-41</sup> Additionally, fear of being stigmatised, rejected, and discriminated against has been found to motivate PWHB to conceal their positive status from family and friends,<sup>25 39 42 43</sup> and non-disclosure of one's HBV status can be a barrier to preventing transmission to others.<sup>44</sup> Further, stigmatisation can serve to deter people at risk for HBV infection from being tested, obtaining treatment when eligible, and from seeking assistance for risk reduction.<sup>28 32 41</sup>

Given the high prevalence of hepatitis B in Ghana,<sup>3</sup> and the paucity of evidence on hepatitis B stigma in Ghana, this study sought to explore the perspectives of PWHB and HCPs on the beliefs contributing to hepatitis B stigma in Northern and Southern Ghana and the ways in which hepatitis B stigma manifests. Understanding this phenomenon is important as it can inform the design of effective hepatitis B and stigma prevention interventions and policies in Ghana and beyond.

## METHODS

### Study Design

An exploratory qualitative design was used to explore the perspectives of PWHB and HCPs on hepatitis B stigma in Ghana. This design was deemed best suited for this study because there is very limited documented evidence on hepatitis B stigma in Ghana.<sup>45</sup> Ethical approval was given by the Korle-Bu Institutional Review Board (IRB).

## Study Setting

The study was conducted in two public health facilities in Ghana. Ghana is a tropical country on the west coast of Africa.<sup>46</sup> According to the most recent census, the population of Ghana was about 28, 308, 301 in 2016.<sup>47</sup> There are ten administrative regions in the country. Each of the regions has a regional hospital which serves as a referral centre for the district hospitals. Also, the country has three main teaching hospitals.<sup>48</sup> A special clinic for clients with liver conditions, including hepatitis B, are run at the tertiary hospitals whereas PWHB are mostly treated as out-patient cases in regional hospitals. One tertiary hospital in the south and one regional hospital in the North were selected for the study.

## Study Population

We recruited PWHB and HCPs including physicians, nurses, and midwives in both Northern and Southern Ghana for the purposes of data source triangulation. Ensuring triangulation was imperative to understanding the hepatitis B stigma comprehensively and to further validating information obtained from the participants.<sup>49</sup> Inclusion of HCPs was deemed appropriate as they play an important role in the provision of care to PWHB.

## Participant Eligibility

### Inclusion Criteria

PWHB were included in the study if they were (1) 18 years or older, and (2) had tested hepatitis B surface antigen (HBsAg) positive for at least 6 months. The inclusion criterion for HCPs was (1) having cared for hepatitis B clients in a healthcare setting.

### Exclusion Criteria

PWHB who were in the terminal stage of the disease and had less energy to go through the interview session were excluded. Also, HCPs who had less than three months working experience in a department where services are provided for PWHB were excluded as these HCPs might not have enough experience with hepatitis B.

## Sampling Method and Data Collection Procedure

A purposeful homogenous sampling technique was employed.<sup>50 51</sup> First, posters with details of the study, including the purpose of the study, assurance of the voluntary nature of the study, as well as the procedure for registration, were advertised in the selected health facilities. PWHB and HCPs were also recruited directly through nurses at the health facilities. Overall, 16 participants were recruited through the advertisements and 49 through nurses. Two PWHB refused to participate. One cited time constraints as the reason and the other declined to provide a reason. Another 5 HCPs did not honour the invitation as a result of an emergency call at work or conflicting schedule with other unplanned social events. PWHB participated in semi-structured in-depth interviews. HCPs were either interviewed or participated in a focus group discussion (FGD). Given the sensitive nature of the topic and the extent to which responses to the study questions could be quite personal for PWHB, PWHB were not recruited for FGDs. Interviews were deemed more appropriate.<sup>52</sup> Two days before the interview/FGD, participants were contacted by telephone to remind them of the appointment. The interviews/FGDs were conducted mostly in the homes of those with

1  
2  
3 hepatitis B (under trees) and the workplace of HCPs (nurses stations and physician's  
4 consulting rooms). The informed consent form was signed by all participants following an  
5 explanation of the purpose of the study and explicit mention of the confidential and voluntary  
6 nature of their participation. In addition, permission was sought from participants to record  
7 the interview/FGD. Field notes were taken during the interviews and the FGDs.  
8  
9

10 Data were collected between February and November 2017. In total, 18 in-depth interviews  
11 were conducted with PWHB and 15 in-depth interviews with HCPs. Additionally, 4 FGD  
12 with a composition of 8 HCPs in each group were conducted. The interviews involving  
13 PWHB and HCPs lasted between 45 minutes and 1 hour whereas the FGDs with HCPs lasted  
14 approximately 1 hour and 15 minutes. Data saturation was reached after the interview of the  
15 14<sup>th</sup> PWHB and 12<sup>th</sup> HCP.<sup>53</sup>  
16  
17  
18  
19

### 20 **Research Instrument**

21 The interview and FGD were guided by a semi-structured protocol with the flexibility to  
22 probe. The protocol was developed based on empirical literature on hepatitis B stigma and  
23 then reviewed by an expert in stigma (SS). Subsequently, the interview protocol was piloted  
24 with two PWHB and two HCPs. The interviews and FGD were conducted by the first author  
25 (CAA) who is fluent in English and the local Ghanaian language (Twi) but all interviews and  
26 FGD were done in English. Topics explored during the interviews with PWHB include (1)  
27 participants experiences being treated poorly or differently because of their HBV sero-  
28 positivity and the settings in which those experiences took place (2) perceived reasons for  
29 being treated poorly or differently (3) the impact of those experiences. Topics explored in the  
30 interviews and FGDs with HCPs were (1) perceptions about hepatitis B, (2) the extent to  
31 which they have provided care to someone with hepatitis B and, their reactions (3) possible  
32 reasons for negative reactions to PWHB. A detailed interview protocol can be found in the  
33 supplementary material 1.  
34  
35  
36  
37  
38

### 39 **Data Analysis**

40 Data were processed with QSR Nvivo version 10.0 and analysed using content analysis.<sup>54</sup> The  
41 first author (CAA) played and listened to the audio recordings and transcribed verbatim. The  
42 first transcribed data were coded by two of the authors (CAA and SS) followed by  
43 discussions on the individual codes, categories, and themes generated. At the end, a  
44 consensus was reached on the codes, and the main themes and sub-themes were documented.  
45 Two main themes and eight sub-themes emerged from the data. These are described in the  
46 sections below.  
47  
48  
49

### 50 **Patient/Public Involvement**

51 Patients and the public were not involved in the development of the research questions, the  
52 design, recruitment, and conduct of the study. The study results will be shared with the  
53 participants and other relevant stakeholders through various social media handles, and  
54 conference presentations.  
55  
56  
57



## RESULTS

### Demographic Characteristics

We recruited, in total, 18 PWHB and 47 HCPs, of which 8 were physicians, 34 were nurses, and 5 were midwives. PWHB were between 21 and 57 years of age and the HCPs were between 23 and 49 years of age. PWHB had lived with the infection between 1 and 7 years and had been diagnosed through one of the following means: self-initiated, physician initiated, during outreach screening services, and as a result of hospital protocol for pregnant women. The HCPs had practised medicine, nursing, or midwifery between 1 and 20 years. Detailed socio-demographic data for PWHB and HCPs are presented in table 1 and table 2 respectively.

### Beliefs About Hepatitis B

PWHB and HCP reported that, in Ghana, hepatitis B is considered highly contagious and very severe. Additionally, it is sometimes associated with curses. These themes are described in detail below.

#### Hepatitis B as highly contagious

It was widely reported by participants with hepatitis B that people in their community believe that hepatitis B can be acquired through casual contact such as handshaking, touching, and eating from the same bowl with an infected person. These modes of transmission were reported to have created fear and panic within the Ghanaian social arena. The situation was further posited to be compounded by the belief that sweat is a medium by which hepatitis B can be transmitted. One participant with hepatitis B said,

*“It is well known that when someone with hepatitis B’s sweat touches you, you can also get the disease or when he shares the same eating bowl with you, you can be infected with the virus by his saliva. This information scares many people and therefore as soon as they get to know you have hepatitis B, they tend to dissociate themselves from you.”* (PWHB - IDI 2<sup>1</sup>)

Another participant with hepatitis B also recounted his experience in school,

*“When we were in school, we knew that the virus could be found in human sweat. With this understanding, when someone meets you lying on his mattress, he becomes very furious because you have the tendency of infecting him with the virus. If you use someone’s spoon or cup and he sees it, that is it, you will have it forever. He will prefer to buy a new one than to use the one used by you to get the virus.”* (PWHB - IDI 7)

According to one PWHB, the fear of infection on the part of others is the result of a lack of knowledge. She said,

---

<sup>1</sup> All names have been changed to protect the identity of participants



1  
2  
3 *“There is a lot of false information about hepatitis B in the public domain which put fear in*  
4 *everyone. Some have the mind-set that you can get the virus from an infected person through*  
5 *a handshake. This makes people alarmed when they know you have the virus.” (PWHB - IDI*  
6 *11)*

7  
8  
9 Similarly, a HCP recounted her experience with a family that nearly ex-communicated their  
10 daughter because of fear of possible transmission of the virus to other relations.

11  
12 *“I had a fourteen year old pregnant lady who had hepatitis B. I counselled her and the*  
13 *mother. When they returned to the house, the father denied the girl opportunity to stay with*  
14 *them to prevent others getting infected. The father thought that people with hepatitis B are*  
15 *not supposed to eat with anyone and the person must use a separate bowl, cups etc. Based on*  
16 *this, he could not accept the girl in the house for fear of passing on the infection to the entire*  
17 *family.” (HCP - FGD 21)*

18  
19  
20  
21 The belief that hepatitis B is easily transmitted was also held by HCPs. Some reported that  
22 because of this they have assigned unique names to hepatitis B positive clients for easy  
23 identification and notification. Also, HCPs reported treating PWHB differently because they  
24 fear possible infection. Some of the reactions from HCP are as follows,

25  
26  
27 *“I am a midwife and in the ward and we have given those with hepatitis B names. We call*  
28 *them candidates. When we identify you as a candidate, most midwives don't want to touch*  
29 *such a person. Even we ignore their money because we believe that where she kept the money*  
30 *sweat could get to it and therefore we don't like it.” (HCP - FGD 13)*

31  
32  
33 Fear of infection on the part of HCPs was also said to result in hepatitis B clients being  
34 neglected by some HCPs.

35  
36  
37 *“We had one hepatitis B case that came in a coma state and if you look at the severity of the*  
38 *condition, most of the staff were not willing to provide any service for the patient. The patient*  
39 *was restless and ended up losing his life after three days. After he died, nobody even wanted*  
40 *to go closer to his dead body because we were afraid that we could be infected.” (HCP - IDI*  
41 *10)*

### 42 43 44 **Hepatitis B as very severe**

45 Participants also indicated that many people think hepatitis B is not only easily transmittable  
46 but very severe. Hepatitis B was claimed to be seen as a condition with poor prognosis which  
47 eventually leads to death. One participant with hepatitis B shared her view,

48  
49  
50  
51 *“Everyone is afraid of the hepatitis B virus. Since it is known that it kills, no one wants to*  
52 *have anything to do with people who have it. Many people are aware of HIV but because it is*  
53 *well publicised that hepatitis B is more deadly than HIV, people are terrified when getting*  
54 *closer to those who are known to have hepatitis B.” (PWHB - IDI 18).*

1  
2  
3 Another HCP said, *“People who are aware of hepatitis B know that it kills. They are very*  
4 *cautious when they hear that someone has hepatitis B.”* (HCP - IDI 2).  
5  
6

7 Participants emphasized the severity by comparing hepatitis B to HIV/AIDS as illustrated by  
8 this quote: *“People say it is deadly, it kills faster than HIV/AIDS.”* (HCP – IDI 12)

9 A belief that was said to contribute to the perceived severity of hepatitis B is the belief that  
10 hepatitis B is incurable.  
11

12 *“What scares us is the information that hepatitis B has no cure. It therefore means that is*  
13 *either you die with it or you live with it forever. HIV which is a popular disease seems to be*  
14 *better than hepatitis B because there are drugs to keep you alive when you get it.”* (PWHB –  
15 IDI 14)  
16  
17

### 18 **Hepatitis B as a curse**

19 Another belief held about hepatitis B is that it affects people who have been cursed for their  
20 wrong doing. This was reported to be based on the fact that people in advanced stages of  
21 hepatitis B clinically present with ascites, jaundice, and oedema, and these presentations are  
22 linked to punishment from gods in the Ghanaian context. According to a number of the  
23 participants, people in their community believe that the swollen abdomen and feet that  
24 characterise hepatitis B suggest that those infected are cursed. This was vividly reported by  
25 some HCPs.  
26  
27  
28  
29

30 *“Ascites [enlarged abdomen] and oedema [swollen feet] is one thing that society perceives as*  
31 *caused by curses. Once they see it, they believe that the person has been cursed. The family*  
32 *members don’t want to get closer since they feel that it is happening because of the person’s*  
33 *bad deeds.”* (HCP - FGD 16)  
34  
35

36 Participants spoke of how, in certain circumstances, family members seek alternative  
37 treatment for hepatitis B when they are convinced that the gods are the cause of the  
38 complications. They seek spiritual support and this often delays health care seeking. One  
39 HCP recounted her experience with her father who had been hepatitis B positive.  
40  
41

42 *“My father had hepatitis B and died. He grew very lean, his stomach bloated and they said it*  
43 *was a curse from the family. He wasn’t taken to the hospital and he was neglected by his*  
44 *siblings. He was moved from one prayer camp to the other, one church to the other thinking*  
45 *he would be cured but when he was brought back to the house, the infection was worse than*  
46 *before. His eyes were very yellowish and he was very lean.”* (HCP – IDI 11)  
47  
48  
49

50 Furthermore, a report by an HCP revealed some of the rituals that are performed in the  
51 healthcare settings before the corpse of someone with hepatitis B is taken out for a burial.  
52 This according to the participant is done to prevent possible effect of the disease on the  
53 family members of the deceased.  
54

55 She said,  
56  
57

1  
2  
3 *“Sometimes when they [PWHB] die, the relatives perform some rituals to cleanse themselves*  
4 *before the body is conveyed to the morgue.” (HCP – IDI 6)*  
5

### 6 **Manifestations of Stigma**

7  
8 In addition to reporting common beliefs about hepatitis B in Ghana, participants also reported  
9 a number of ways in which hepatitis B stigma manifests, both in general and specifically in  
10 healthcare settings.  
11

### 12 **Avoidance**

13  
14 Participants reported various ways in which stigmatisation was expressed toward PWHB.  
15 Avoidance was a typical reaction reported. A participant with hepatitis B recounted her  
16 experience following diagnosis and disclosure of her status to her close relation.  
17

18  
19 *“As soon as they see that you have hepatitis B, they start avoiding you; something you pick,*  
20 *they won’t pick; something you have used, they don’t want to get closer to it. At first, I used*  
21 *to do things together with my uncle. Whenever he is eating, I can put my hand in it and eat*  
22 *with him. After I told him that I was hepatitis B positive, he avoids me completely. Anytime he*  
23 *returns from work he just greets me and enters his room. I don’t see him to chat and joke like*  
24 *the way we used to.” (PWHB - IDI 3)*  
25  
26

27  
28 Another participant with hepatitis B also said,  
29

30  
31 *“Hmmm! When my household members see me, they change their conversation. When they*  
32 *are chatting and I go to sit down, then they get up. They treat you as if you have shit on*  
33 *yourself. Everyone leaves you with so many excuses.” (PWHB – IDI 16)*  
34

35  
36 Avoidance was also reported to occur in the healthcare settings. One HCP shared how she  
37 avoided a colleague after learning she had hepatitis B.  
38

39  
40 *“I was working at one sub-district and the staff were friendly and so we were eating together.*  
41 *One day, we were chatting and a colleague said, ‘She is hepatitis B positive’. From that day,*  
42 *I never ate with them again because I felt uncomfortable. Knowing that the virus can be in*  
43 *the saliva and there could be exchange of saliva while eating from the same bowl, I was*  
44 *afraid of getting the infection so I stopped eating with them.” (HCP - FGD 8)*  
45

46  
47 Some of the avoidance was said to be based on speculations. People who were known or  
48 suspected to have a sexual relationship with a hepatitis B positive individual were also said to  
49 be avoided.  
50

51  
52 *“I was in a community health centre with subordinates who were young nurses. They were*  
53 *eating together, doing everything together and very close until there was a death of a man. It*  
54 *came out that the person died of hepatitis B and one of the nurses was said to be the*  
55 *girlfriend. After the funeral, the girl was deserted. The eating together could not continue*  
56  
57

1  
2  
3 *and, in fact, the girl became very worried and miserable because the relationship with her*  
4 *colleagues changed.” (HCP - FGD 30)*  
5

6 Another participant narrated a similar experience,  
7

8 *“I stayed in a compound house with a certain lady who was befriending someone positive of*  
9 *hepatitis B. Later, somebody in the yard got to know that the man was hepatitis B positive*  
10 *and the news spread in the yard. Nobody was coming near her veranda because they*  
11 *concluded that once the guy had hepatitis B then the lady has also gotten it. When they are*  
12 *sitting in the yard and she comes to sit, they all enter their rooms. Nobody was going close to*  
13 *her until she had a quarrel with one of the residents and she was insulted as having hepatitis*  
14 *B. That was when the lady got to know why everybody was avoiding her.” (HCP - FGD 4)*  
15  
16  
17

### 18 **Isolation and physical distance**

19 Participants also reported isolation and increased physical distance as manifestations of  
20 stigma. They reported that, in some senior high schools where students reside in the  
21 dormitories, those with hepatitis B are isolated from their peers in an effort to prevent  
22 possible transmission of the virus to other students. One HCP narrated an encounter she had  
23 with a man, whose son suffered this treatment in school,  
24  
25

26  
27 *“I met one man who was lamenting that his son in a senior high school was ejected from the*  
28 *school dormitory because he tested hepatitis B positive. The boy has been isolated and now*  
29 *sleeps in the classroom. The school authorities feel that, if they don’t isolate those who are*  
30 *positive, they will end up infecting everybody and more students. Parents are compelled to*  
31 *get houses outside school campus for such students.” (HCP - FGD 14)*  
32  
33

34 Participants also indicated that, in some parts of Northern Ghana, people who test hepatitis B  
35 positive are confined to their rooms. They are treated as outcasts and have many social  
36 restrictions. Additionally, it was reported that some PWHB have family roles taken from  
37 them and are denied participation in family functions. A hepatitis B positive participant  
38 shared her observations,  
39  
40

41 *“The person is isolated when family members are made aware of his/her hepatitis B positive*  
42 *status. If they were cooking in one pot, the person ceases to cook with them. They give them*  
43 *their own room and sometimes put the person very far away. They [PWHB] don’t move*  
44 *around and always stay inside mourning their dead when not dead. They only come and*  
45 *throw their food to them to take and eat. They won’t let you feel that you are also normal like*  
46 *them.” (PWHB – IDI 8)*  
47  
48  
49

50 The social isolation of PWHB was also reported to occur in the healthcare settings as well. In  
51 this context, isolation occurred because, according to the participants, people tend to believe,  
52 as reported above, that an infected person can pass the infection to others through sweat. This  
53 was claimed to motivate HCPs actions to separate PWHB from other clients. *“We put them*  
54 *[PWHB] at the extreme corner where no one goes there.” (HCP - IDI 3)*  
55  
56  
57

1  
2  
3  
4 Another PWHB shared his thoughts,  
5

6  
7 *“Many people see those with hepatitis B as sources of infection because they think it can be*  
8 *transmitted through sweat. They are sometimes afraid to go closer to them especially when*  
9 *the person looks jaundiced (yellowish) and the stomach becomes big. Everyone becomes*  
10 *scared and they may treat the person like a leper by distancing themselves from the person.”*  
11 (PWHB – IDI 15)  
12

13  
14 The public reaction toward PWHB was said to worsen when they exhibit severe forms of  
15 jaundice,  
16

17  
18 *“Some people feel that when you have hepatitis B and you look yellowish, it means that the*  
19 *viruses are too many in your blood. At that point, everyone withdraws. When the person dies,*  
20 *they don’t waste time to keep his/her body for proper funeral but quickly bury the person. I*  
21 *have seen a number of cases like that in my village.”* (PWHB - IDI 3)  
22  
23

24 Furthermore, participants indicated that family members sometimes distance themselves  
25 because they consider it as way of escaping the wrath of the gods, reflecting again the belief  
26 that hepatitis B is a curse from the gods,  
27

28  
29 *“People fear to be closer to someone who has been cursed so they withdraw from the person*  
30 *in order not to attract the anger of the gods.”* (HCP - FGD 27)  
31  
32

### 33 **Stigmatisation in health care settings**

34 Specific manifestations of stigma in health care settings were reported as well. There, stigma  
35 not only manifested as avoidance, increased physical distance, and isolation as outlined  
36 above, but also as excessive cautiousness, task-shifting, procedure avoidance, breaches of  
37 confidentiality, and silence.  
38  
39

### 40 **Excessive cautiousness by HCPs**

41 Participants reported that excessive cautiousness was taken by HCPs when provided care to  
42 clients with hepatitis B. This was evidenced by the use of extreme infection prevention  
43 precautions. In some instances, HCPs stated that they wore extra gloves to prevent possible  
44 acquisition of the virus,  
45  
46

47  
48 *“Anytime I am managing someone with hepatitis B, I am extra careful. I put on more than*  
49 *one gloves and also wash my hands regularly.”* (HCP - FGD 20)  
50  
51

52 Another HCP explained how this is related to the belief that hepatitis B is highly contagious,  
53 *“When you get to know that the patient has hepatitis B infection, the mind-set changes*  
54 *outright. You become very cautious because you are afraid of getting infected.”* (HCP - IDI  
55 9)  
56  
57

1  
2  
3  
4 Notwithstanding, some HCPs indicated that their actions were dependent on the kind of  
5 procedure.  
6

7  
8 *“Sometimes it depends on what you are going to do for the person. For instance, when I am*  
9 *going to empty the urine bag, I put on three gloves. But when I am feeding them, I don’t do*  
10 *that because I know I am not coming into contact with anybody’s fluid.” (HCP - FGD 22)*  
11

12  
13 Some HCPs reported that their negative perception about hepatitis B compromises, to some  
14 extent, their professional ethics.  
15

16  
17 *“I’ve seen a couple of cases where midwives were very careful not wanting to assist the*  
18 *delivery of hepatitis B positive woman. Even the baby that was born, they were very sceptical*  
19 *touching her and the mother. The way they handled them and the way they talked about it -*  
20 *“whispering” when they are handing over - sometimes it is very obvious that they are*  
21 *stigmatising the client.” (HCP- IDI 1)*  
22

#### 23 24 **Task-shifting and procedure avoidance**

25 The majority of the HCPs indicated that postponement of procedures and task shifting are  
26 common when caring for PWHB. In some instances, HCPs failed to perform nursing  
27 procedures but, rather, delayed care when the client was identified as having hepatitis B. This  
28 too was reported to occur because of the perceived contagiousness of hepatitis B.  
29

30  
31 *“When we see them [PWHB] at the critical stage, some vomiting blood and coughing out*  
32 *blood, you will see some nurses postponing procedures because they think that they can be*  
33 *infected.” (HCP - FGD 5)*  
34

35  
36 Another participant said,

37  
38 *“I ever sent a patient to the hospital. The intravenous line infiltrated and the nurses were*  
39 *supposed to change it. I was amazed that no nurse was ready to do it. This nurse will say to*  
40 *the other to go and do it. Another said let’s wait for the doctor and giggled. So I was getting*  
41 *afraid. Is this person having HIV or what that no one seems interested working on him?”*  
42 *(HCP - FGD 23)*  
43

44  
45 A number of the participants indicated that some HCPs shift their tasks such that student  
46 nurses have to perform them. A nurse recounted her experience during her formal clinical  
47 training,  
48

49  
50 *“During our clinical placement, when cases like hepatitis B are admitted, it was we, the*  
51 *students, that the nurses used to send to go and manage those clients. In fact, they won’t let*  
52 *you know the exact condition until you cannot do something. Even that, when one of them is*  
53 *coming to help you, the gloves will be more than five. Even with that, she will still come and*  
54 *stand and say, “hold this place”, “do that”. She will not do it. So, if they begin to do that and*  
55  
56  
57



1  
2  
3 you also take the patient's folder and you see that it is hepatitis B, then you advise yourself"  
4 (HCP - FGD 19)  
5

6 Another nurse said,  
7

8  
9 *"During my first clinical attachment as a student nurse, hepatitis B patients were put in the*  
10 *cubicle or an isolated veranda. Anytime they [nurses] were to attend to them, either during*  
11 *dressing, checking of vital signs, it was student nurses that they ask us to go and do."* (HCP-  
12 FGD 10)  
13

### 14 **Breaches of confidentiality and silence**

15 Two final manifestations of stigma that were reported to occur in healthcare settings were  
16 breaches of confidentiality and, conversely, silence, thus simply not discussing hepatitis B.  
17 Participants reported that some HCPs indeed fail to maintain confidentiality. According to  
18 some participants, it is common to receive information about PWHB from a colleague in the  
19 various hospital wards and units.  
20  
21

22  
23  
24 *"The moment they diagnose somebody hepatitis B positive, even if it is one single nurse who*  
25 *is on duty, the whole hospital will hear. The nurse will circulate the information until that*  
26 *ward nurses finish and everybody is informed. If the person is pregnant, it will even spread*  
27 *to the antenatal unit and then to maternity ward and every nurse become careful with such a*  
28 *person."* (HCP - FGD 28)  
29

30  
31 Conversely, silence on hepatitis B was reported as well. One participant explained the kind of  
32 "silence" reactions that occurred in health care settings.  
33

34  
35 *"Personally I really feel disheartened during that moment when we are operating on*  
36 *hepatitis B patients. The whole theatre setting becomes like a horror scene. The staff seem to*  
37 *be afraid of possible infection. The room becomes quiet and the basic care becomes alarmed.*  
38 *It's like hell has entered the theatre."* (HCP - IDI 1)  
39  
40

### 41 **DISCUSSION**

42  
43 This study set out to explore the perspectives of PWHB and HCPs on the beliefs contributing  
44 to hepatitis B stigma in Northern and Southern Ghana and the ways in which hepatitis B  
45 stigma manifests. Our findings show three main beliefs underlie hepatitis B stigma in Ghana,  
46 namely 1) the belief that hepatitis B is highly contagious; 2) the belief that hepatitis B is very  
47 severe; and c) the belief that hepatitis B is caused by curses. Our findings also show that  
48 hepatitis B stigmatisation manifests as avoidance, isolation, and physical distance. In the  
49 healthcare setting, excessive cautiousness, task-shifting, procedure avoidance, breaches of  
50 confidentiality, and silence by HCPs were also reported.  
51  
52

53  
54 The belief that hepatitis B is highly contagious was reported by both PWHB and HCPs as  
55 central to the existence of stigma in Ghana. Contributing to this perceived contagiousness  
56  
57



1  
2  
3 were beliefs that hepatitis B can be transmitted through casual contact such as handshaking,  
4 touching, and the sharing of eating utensils with hepatitis B infected persons and a focus on  
5 body fluids, such as sweat, as a source of infection. Stigmatisation originating from a fear of  
6 infection is not particular to Ghana, but has been reported in other locations.<sup>26 33 42 55-59</sup> For  
7 example, in Pakistan, Rafique and colleagues<sup>33</sup> indicated that PWHB suffered stigmatising  
8 reactions from their families who feared infection and thus refused to share eating and  
9 drinking utensils, as well as soap and towels with relatives living with hepatitis B. That sweat  
10 was claimed to be an important source of HBV transmission thus leading to avoidance of  
11 PWHB has also previously been documented by a study conducted in Nigeria.<sup>60</sup> That sweat is  
12 in fact not a vehicle for HBV transmission<sup>61</sup> suggests a knowledge deficit regarding hepatitis  
13 B transmission not only among the general public in Ghana but also among HCPs. This is  
14 particularly disconcerting given that HCPs are considered an important source of hepatitis B  
15 information by their clients.<sup>62</sup>

16  
17  
18  
19  
20 Our study further showed that the belief that hepatitis B is very severe is also present in  
21 Ghana and that this contributes to stigmatisation. Generally, participants perceived hepatitis  
22 B as deadly. This is consistent with a study conducted by Upadhyaya et al.<sup>63</sup> in the United  
23 State. In that study Upadhyaya and colleagues assessed the role and attitude of primary care  
24 physicians in hepatitis B diagnosis and treatment. They found that physicians perceived  
25 hepatitis B as very serious.<sup>63</sup> Interestingly, in our study and previous study also conducted in  
26 Ghana,<sup>34</sup> hepatitis B was perceived to be even more severe than HIV. This could be  
27 attributable to the fact that hepatitis B is not optimally managed in Ghana. Antiretroviral  
28 treatment for hepatitis B is not readily available and affordable,<sup>16 44</sup> the number of specialised  
29 clinics that can monitor and support PWHB is inadequate,<sup>34</sup> and the WHO policy on  
30 treatment, management, and support of PWHB in Ghana has not yet been implemented.<sup>64 34</sup>

31  
32  
33  
34 Another finding of this study was the belief that hepatitis B is caused by curses. An earlier  
35 study has shown that people attach superstitious beliefs to hepatitis B in Ghana.<sup>34</sup> Also, a  
36 study conducted by Adjei et al. entitled “hepatitis B infection among perturient in Peri-Urban  
37 Ghana” found that 86% ( $n=168$ ) of participants linked the cause of hepatitis B to curses. This  
38 association is unsurprising given that some clinical manifestations of hepatitis B, including  
39 swollen abdomen and feet, are analogous to the outcomes of a curse in Ghanaian culture. In  
40 Ghana, people are particularly cautious about handling items perceived to be cursed as not  
41 handling them can help to avoid possible transfer of the consequences.

42  
43  
44  
45 In addition to documenting beliefs about hepatitis B that contribute to stigmatisation, we also  
46 explored manifestations of hepatitis B stigma. One manifestation was avoidance. This finding  
47 is consistent with other studies.<sup>55 57</sup> For example, in a study conducted in Japan with a sample  
48 of the working population, Eguchi and Wada<sup>55</sup> found that 32.1% of their study participants  
49 avoided physical contact with colleagues after learning their HBV positive status. Similarly,  
50 in an Iranian study, patients with hepatitis B reported believing that saliva is a source of  
51 hepatitis B infection and therefore avoiding body contact with close relations including  
52 kissing.<sup>59</sup>

1  
2  
3 In our study, we also found that stigma manifests as isolation and physical distance. Our  
4 finding that students were isolated from their counterparts in school dormitories because of  
5 their hepatitis B status is similar to a finding from a study in China where a university student  
6 with hepatitis B was put in a single room instead of a shared dormitory.<sup>58</sup> In another  
7 somewhat earlier study by Yang and Wu,<sup>65</sup> the findings showed that some universities and  
8 kindergartens in China refused to admit prospective students who were hepatitis B positive.  
9

10  
11 Our study also looked specifically at hepatitis B stigma in healthcare settings. The findings  
12 showed that stigmatisation took form as excessive cautiousness, task-shifting and procedure  
13 avoidance, breaches of confidentiality, and silence by HCPs. Perhaps inadequate knowledge  
14 and fear of acquisition of HBV among the HCPs led to the excessive cautiousness and fear.  
15 This has been previously document by Yu and colleagues<sup>66</sup> in China. Similarly, Wada et al.<sup>38</sup>,  
16 in their study conducted in Japan, reported that some nurses were also reluctant to care for  
17 PWHB due to a perceived risk of infection. In another study conducted in Iran with hepatitis  
18 B patients by Dehkordi and others<sup>39</sup>, nurses and doctors were reported to be hesitant caring  
19 for PWHB after realising they have hepatitis B.  
20  
21

22  
23 Our findings have important practical implications. First, the findings provide important  
24 insight on how to go about reducing hepatitis B stigma. Given the prevalence of incorrect  
25 knowledge, as reflect in the beliefs about hepatitis B, we recommend public awareness  
26 campaigns that emphasize hepatitis B transmission routes. Also, given the manifestations of  
27 the stigma in the healthcare settings, we feel that a continuing professional development  
28 programme on the epidemiology of hepatitis B is called as this can enhance their knowledge  
29 in parallel to public awareness campaigns. Additionally, we recommend efforts to increase  
30 health literacy on hepatitis B prevention measures, including vaccination, as this may  
31 increase HCPs confidence when caring for PWHB. If developed based on both theory and  
32 evidence and in collaboration with target populations, these interventions have the potential  
33 to effectively reduce hepatitis B stigma in Ghana<sup>67</sup>  
34  
35  
36

37 The findings of this study should be viewed in light of a few limitations. First, given the  
38 qualitative nature of the study, it is important to be cautious in generalising these findings.  
39 We therefore recommend following this study with a quantitative study that can quantify the  
40 extent to which hepatitis stigma is present in Ghana. Second, given that participants,  
41 particularly PWHB, were asked to retrospectively recall experiences, there is potential for  
42 recall bias in this study. We, however, sought to reduce this by asking follow-up questions to  
43 confirm or verify participants' experiences.  
44  
45  
46

## 47 **Conclusion**

48  
49 This study gives insight about beliefs contributing to hepatitis B stigma in Ghana and its  
50 manifestations. We found that beliefs that hepatitis B is highly contagious, very severe, and  
51 caused by a curse are present and contribute to the stigmatisation of PWHB in Ghana.  
52 Hepatitis B stigmatisation manifested as avoidance, isolation, and physical distance. In the  
53 healthcare settings, excessive cautiousness, task-shifting, procedure avoidance, breaches of  
54 confidentiality, and silence by HCPs were also found. We therefore recommend interventions  
55  
56  
57

1  
2  
3 that seek to alter the beliefs contributing to hepatitis B stigma in Ghana, starting with efforts  
4 that correct knowledge deficits.  
5

6 **Acknowledgement:** We acknowledge the Ghana Education Trust Fund (GETFUND) for  
7 supporting the First author's PhD programme. We appreciate the support of Mr. Gilbert  
8 Nachinab, Miss Suglo, and Miss Adu-Twumwaa during the period of data collection. We  
9 acknowledge the contribution of the study participants.  
10

### 11 **Abbreviation**

12 HBV- Hepatitis B Virus; PWHB- People with Hepatitis B; HCPs – Healthcare Providers; IDI  
13 – In-depth Interviews; FGD – Focus Group Discussions  
14  
15

### 16 **Funding**

17 No funding  
18  
19

20  
21 **Availability of data and materials:** Participants have consented for anonymised transcripts  
22 to be shared upon request.  
23

24  
25 **Authors Contribution:** CAA conceptualised the study. CAA, SES, RACR, FN designed the  
26 study. Interview guide was designed by CAA and SES. Data analysis was done by CAA and  
27 SES. Manuscript was critically reviewed by SES, FN, RACR. All authors read and approved  
28 the manuscript.  
29

30  
31 **Competing interests:** The authors declare no conflict of interest in this study.

32 **Consent for publication:** Not applicable  
33

### 34 **Ethical Approval**

35 Ethical clearance was obtained from Institutional Review Board of Korle-Bu Teaching  
36 Hospital (Approval number KBTH-IRB 00092/2016). Permission was sought from the  
37 management of the data collection sites, and informed consent (written) was obtained from  
38 the participants.  
39  
40

### 41 **References**

- 42  
43  
44  
45  
46 1. Schweitzer A, Horn J, Mikolajczyk RT, *et al.* Estimations of worldwide prevalence of  
47 chronic hepatitis B virus infection: A systematic review of data published between  
48 1965 and 2013. *Lancet* 2015;**386**:1546–55. doi:10.1016/S0140-6736(15)61412-X  
49  
50  
51 2. WHO. Hepatitis B Fact Sheet. 2018a. [Retrieved from:  
52 <http://www.who.int/mediacentre/factsheets/fs204/en/>. Available on February 06,  
53 2018]  
54  
55  
56  
57

- 1  
2  
3 5. Ofori-Asenso R, Agyeman AA. Hepatitis B in Ghana: a systematic review & meta-analysis of prevalence studies (1995-2015). *BMC Infect Dis* 2016;**16**:130. doi:10.1186/s12879-016-1467-5
- 4  
5  
6  
7  
8 4. Musa BM, Bussell S, Borodo MM, *et al.* Prevalence of hepatitis B virus infection in Nigeria, 2000-2013: a systematic review and meta-analysis. *Niger J clin Pr* 2015;**18**:163–72. doi:10.4103/1119-3077.151035
- 9  
10  
11  
12  
13 5. Kolou M, Katawa G, Salou M, *et al.* High Prevalence of Hepatitis B Virus Infection in the Age Range of 20-39 Years Old Individuals in Lome. 2015;:1–7. doi:10.2174/1874357901710011001
- 14  
15  
16  
17  
18 6. Bigna JJ, Amougou MA, Asangbeh SL, *et al.* Seroprevalence of hepatitis B virus infection in Cameroon : a systematic review and meta-analysis. 2017;:1–12. doi:10.1136/bmjopen-2016-015298
- 19  
20  
21  
22  
23 7. Rufai T, Mutocheluh M, Kwarteng K, *et al.* The prevalence of hepatitis B virus E antigen among Ghanaian blood donors. *Pan Afr Med J* 2014;**17**:53. doi:10.11604/pamj.2014.17.53.3390
- 24  
25  
26  
27  
28 8. Mutocheluh M, Owusu M, Kwofie TB, *et al.* Risk factors associated with hepatitis B exposure and the reliability of five rapid kits commonly used for screening blood donors in Ghana. *BMC Res Notes* 2014;**7**:1–8. doi:10.1186/1756-0500-7-8739.
- 29  
30  
31  
32 9. Sagoe KWC, Agyei AA, Ziga F, Lartey M, Adiku TK, Seshi M, Arens MQ, Mingle J A A. Prevalence and Impact of Hepatitis B and C Virus Co-Infections in Antiretroviral Treatment Naive Patients with HIV Infection at a Major Treatment Center in Ghana. *Journal of Medical Virology* 2012; **84**: 6-10
- 33  
34  
35  
36  
37 10. Adjei AA, Armah HB, Gbagbo F, *et al.* Correlates of HIV, HBV, HCV and syphilis infections among prison inmates and officers in Ghana: A national multicenter study. *BMC Infect Dis* 2008;**8**:1–12. doi:10.1186/1471-2334-8-33
- 38  
39  
40  
41  
42 11. Candotti D, Danso K, Allain J-P. Maternofetal transmission of hepatitis B virus genotype E in Ghana, west Africa. *J Gen Virol* 2007;**88**:2686–95. doi:10.1099/vir.0.83102-0
- 43  
44  
45  
46 12. Cho Y, Bonsu G, Akoto-Ampaw A, *et al.* The prevalence and risk factors for hepatitis B surface Ag positivity in pregnant women in eastern region of Ghana. *Gut Liver* 2012;**6**:235–40. doi:10.5009/gnl.2012.6.2.235
- 47  
48  
49  
50  
51 13. Trépo C, Chan HLY, Lok A. Hepatitis B virus infection. *Lancet* 2014;**6736**:1–11. doi:10.1016/S0140-6736(14)60220-8
- 52  
53  
54  
55 14. Giles-Vernick T, Hejoaka F, Sanou A, Shimakawa Y, Bamba I, Traoré A. Barriers to
- 56  
57  
58  
59  
60

- 1  
2  
3 Linkage to Care for Hepatitis B Virus Infection: A Qualitative Analysis in Burkina  
4 Faso, West Africa. *Am J Trop Med Hyg* 2016;**95**:1368–75. doi:10.4269/ajtmh.16-  
5 0398  
6  
7  
8 15. Lemoine M, Eholié S, Lacombe K. Reducing the neglected burden of viral hepatitis  
9 in Africa: Strategies for a global approach. *J Hepatol* 2015;**62**:469–76.  
10 doi:10.1016/j.jhep.2014.10.008  
11  
12 16. Nwokediuko SC. Chronic Hepatitis B : Management Challenges in Resource-Poor  
13 Coun- tries. 2011;**11**:786–93. doi:10.5812/kowsar.1735143X.757  
14  
15 17. Butt G, Paterson BL, McGuinness LK. Living with the stigma of hepatitis C. *West J*  
16 *Nurs Res* 2008;**30**:204–21. doi:10.1177/0193945907302771  
17  
18 18. Sandelowski, M., Lambe, C., & Barroso, J. (2004). Stigma in HIV-Positive Women.  
19 *J Nurs Scholarsh.*, 2004;36 (2):122-8  
20  
21  
22 19. Stutterheim SE, Bos AER, Shiripinda I, *et al.* HIV-related stigma in African and  
23 Afro-Caribbean communities in the Netherlands : Manifestations , consequences , and  
24 coping. *Psychol Health* 2012;**27**:1–32. doi:10.1080/08870446.2011.585426  
25  
26  
27 20. Colombini M, Mutemwa R, Kivunaga J, *et al.* Experiences of stigma among women  
28 living with HIV attending sexual and reproductive health services in Kenya : a  
29 qualitative study. 2014:1–9.  
30  
31  
32 21. Courtwright A. Tuberculosis and Stigmatization : Pathways and Interventions.  
33 ;**125**:34–42.  
34  
35  
36 22. Miller C, Huston J, Samu L, *et al.* ‘ It makes the patient ’ s spirit weaker ’ :  
37 tuberculosis  
38 stigma and gender interaction in Dar es Salaam , Tanzania. 2017;**21**:42–9.  
39  
40  
41 23. Cotler SJ, Cotler S, Xie H, *et al.* Characterizing hepatitis B stigma in Chinese  
42 immigrants. *J Viral Hepat* 2012;**19**:147–52. doi:10.1111/j.1365-2893.2011.01462.x  
43  
44  
45 24. Ellard, J. & Wallace J. (2013). Stigma and discrimination and hepatitis B: A review  
46 of current research. *ARCSHS Monographs Series*, 93  
47  
48  
49 25. Ng CJ, Low WY, Wong LP, *et al.* Uncovering the experiences and needs of patients  
50 with chronic hepatitis B infection at diagnosis: a qualitative study. *Asia Pac J Public*  
51 *Health* 2013;**25**:32–40. doi:10.1177/1010539511413258  
52  
53  
54 26. Wu H, Yim C, Chan A, *et al.* Sociocultural factors that potentially affect the  
55 institution  
56  
57  
58  
59  
60

- of prevention and treatment strategies for hepatitis B in Chinese Canadians. *Can J Gastroenterol* 2009;**23**:31–6.
27. Alizadeh a HM, Ranjbar M, Yadollahzadeh M. Patient concerns regarding chronic hepatitis B and C infection. 2008;**14**:1142–8.
28. Guirgis M, Nusair F, Bu YM, *et al*. Barriers faced by migrants in accessing healthcare for viral hepatitis infection. *Intern Med J* 2012;**42**:491–6. doi:10.1111/j.1445-5994.2011.02647.x
29. WHO. “My untold story”- a hepatitis B patient in Ghana shares his experience. 2018b. [Retrieved from: [http://www.who.int/hepatitis/news-events/ghana-pr-an\\_untold\\_story/en/](http://www.who.int/hepatitis/news-events/ghana-pr-an_untold_story/en/). Available on February 20, 2018]
30. Pescosolido BA, Martin JK. Stigma Complex. *Annu. Rev. Sociol.*, 2015; **41**: 87–116.
31. Link B, Phelan J, Wheaton B, *et al*. Labeling and Stigma. *A Handb Study Ment Heal Soc Context Theor Syst* 1999;**367**:171–99. doi:10.1016/j.socscimed.2013.07.035.Stigma
32. Li D, Tang T, Patterson M, *et al*. The impact of hepatitis B knowledge and stigma on screening in Canadian Chinese persons. 2012;**26**:597–602.
33. Rafique I, Saqib MAN, Siddiqui S, *et al*. Experiences of stigma among hepatitis B and C patients in Rawalpindi and Islamabad, Pakistan/Expériences de stigmatisation chez des patients atteints d’hépatite B et C à Rawalpindi et Islamabad (Pakistan). *East Mediterr Heal J* 2014;**20**:796.
34. Adjei CA, Naab F, Donkor ES. Beyond the diagnosis: a qualitative exploration of the experiences of persons with hepatitis B in the Accra Metropolis, Ghana. *BMJ Open* 2017;**7**:e017665. doi:10.1136/bmjopen-2017-017665
35. Yoo GJ, Fang T, Zola J, *et al*. Destigmatizing hepatitis B in the Asian American community: Lessons learned from the San Francisco Hep B free campaign. *J Cancer Educ* 2012;**27**:138–44. doi:10.1007/s13187-011-0252-9
36. Huang J, Guan ML, Balch J, *et al*. Survey of hepatitis B knowledge and stigma among chronically infected patients and uninfected persons in Beijing, China. *Liver Int* 2016;**36**:1595–603. doi:10.1111/liv.13168



- 1  
2  
3 37. Carabez RM, Swanner JA, Yoo GJ, *et al.* Knowledge and fears among Asian  
4 Americans chronically infected with hepatitis B. *J Cancer Educ* 2014;**29**:522–8.  
5 doi:10.1007/s13187-013-0585-7  
6  
7 38. Wada K, Smith DR, Ishimaru T. Reluctance to care for patients with HIV or  
8 hepatitis B / C in Japan. *BMC Pregnancy Childbirth* 2016;**16**:1–6.  
9 doi:10.1186/s12884-016-0822-2  
10  
11 39. Dehkordi AH, Mohammadi N, NikbakhatNasrabadi A. Hepatitis-related stigma in  
12 chronic patients: A qualitative study. *Appl Nurs Res* 2016;**29**:206–10.  
13 doi:10.1016/j.apnr.2015.04.010  
14  
15 40. Lee H, Fawcett J, Yang JH, *et al.* Correlates of Hepatitis B Virus Health-Related  
16 Behaviors of Korean Americans : A Situation-Specific Nursing Theory. 2012;:315–  
17 22. doi:10.1111/j.1547-5069.2012.01468.x  
18  
19 41. Shi J, Chyun D a., Sun Z, *et al.* Assessing the stigma toward chronic carriers of  
20 hepatitis B virus: development and validation of a Chinese college students' stigma  
21 scale. *J Appl Soc Psychol* 2013;**43**:E46–55. doi:10.1111/jasp.12040  
22  
23 42. Mohamed R, Ng CJ, Tong WT, *et al.* Knowledge, attitudes and practices among  
24 people with chronic hepatitis B attending a hepatology clinic in Malaysia: a cross  
25 sectional study. *BMC Public Health* 2012;**12**:601. doi:10.1186/1471-2458-12-601  
26  
27 43. Wallace J, McNally S, Richmond J, *et al.* Managing chronic hepatitis B: A  
28 qualitative study exploring the perspectives of people living with chronic hepatitis B in  
29 Australia. *BMC Res Notes* 2011;**4**:45. doi:10.1186/1756-0500-4-45  
30  
31  
32 44. Spearman CW, Afihene M, Ally R, *et al.* Hepatitis B in sub-Saharan Africa:  
33 strategies to achieve the 2030 elimination targets. *Lancet Gastroenterol Hepatol*  
34 2017;**2**:2121. doi:10.1016/S2468-1253(17)30295-9  
35  
36  
37 45. Labaree RV. Organising your Social sciences Research Paper: Types of  
38 Research designs. 2009.[Retrieved from:  
39 <http://libguides.usc.edu/writingguide/researchdesigns>. Availabe on January 25, 2018]  
40  
41 46. Ghana Statistical Service. Ghana Health Service (GHS), and ICF Macro.  
42 Ghana Demographic and Health Survey 2008, Calverton, Maryland, USA: GSS,  
43 GHS, and Macro International. 2009  
44  
45 47. Ghana Statistical Service. 2010 population projected by sex, 2010-2016. 2016.  
46 Retrieved from: [http://www.statsghana.gov.gh/pop\\_stats.html](http://www.statsghana.gov.gh/pop_stats.html), Accessed on May 24,  
47 2018]  
48  
49 48. Ministry of Health. Category: Ministry agencies. 2018. [Retrieved from:  
50 <http://www.moh.gov.gh/category/ministry-agencies/>, Accessed on January 01, 2017]  
51  
52 49. Carter N, Bryant-Lukosius D, DiCenso A, *et al.* The Use of Triangulation in  
53 Qualitative Research. *Oncol Nurs Forum* 2014;**41**:545–7. doi:10.1188/14.ONF.545-  
54 547  
55  
56  
57  
58  
59  
60



- 1  
2  
3  
4 50. Etikan I, Musa SA, Alkassim RS. Comparison of Convenience Sampling and  
5 Purposive Sampling. 2016;**5**:1–4. doi:10.11648/j.ajtas.20160501.1  
6  
7 51. Palinkas L a, Horwitz SM, Green C a, *et al.* Purposeful Sampling for Qualitative  
8 Data Collection and Analysis in Mixed Method Implementation Research. *Adm Policy*  
9 *Ment Heal* 2015;**42**:533–44. doi:10.1007/s10488-013-0528-y.Purposeful  
10  
11  
12 52. Wellings K, Branigan P, Mitchell K. Discomfort, discord and discontinuity as data:  
13 Using focus groups to research sensitive topics. *Cult Heal Sex* 2000;**2**:255–67.  
14 doi:10.1080/136910500422241  
15  
16 53. Polit DF, Beck CT. Nursing research: Principles and methods (8<sup>TH</sup>  
17 Edition). 2014. Lippincot William & Wilkins.  
18  
19 54. Graneheim UH, Lundman B. Qualitative content analysis in nursing research:  
20 Concepts, procedures and measures to achieve trustworthiness. *Nurse Educ Today*  
21 2004;**24**:105–12. doi:10.1016/j.nedt.2003.10.001  
22  
23 55. Eguchi H, Wada K. Knowledge of HBV and HCV and Individuals' Attitudes  
24 Toward HBV- and HCV-Infected Colleagues: A National Cross-Sectional Study  
25 among a Working Population in Japan. *PLoS One* 2013;**8**:1–7.  
26 doi:10.1371/journal.pone.0076921  
27  
28 56. Dahl TFM, Cowie BC, Biggs B, *et al.* Health literacy in patients with chronic  
29 hepatitis  
30 B attending a tertiary hospital in Melbourne : a questionnaire based survey. 2014;:1–  
31 9.  
32  
33 57. Dam L, Cheng A, Tran P, *et al.* Hepatitis B stigma and knowledge among  
34 Vietnamese in Ho Chi Minh City and Chicago. *Can J Gastroenterol Hepatol*  
35 2016;**2016**. doi:10.1155/2016/1910292  
36  
37 58. Kan Q, Wen J, Xue R. Discrimination against people with hepatitis B in China.  
38 *Lancet* 2015;**386**:245–6. doi:10.1016/S0140-6736(15)61276-4  
39  
40 59. Valizadeh L, Zamanzadeh V, Bayani M, *et al.* The Social Stigma Experience in  
41 Patients With Hepatitis B Infection. *Gastroenterol Nurs* 2017;**40**:143–50.  
42 doi:10.1097/SGA.0000000000000223  
43  
44 60. Ochu CL, Beynon CM. Hepatitis B vaccination coverage, knowledge and  
45 sociodemographic determinants of uptake in high risk public safety workers in  
46 Kaduna State, Nigeria: A cross sectional survey. *BMJ Open* 2017;**7**:1–10.  
47 doi:10.1136/bmjopen-2017-015845  
48  
49 61. Schillie S, Vellozzi C, Reingold A, Harris A, Haber P, Ward JW,  
50 Nelson NP. Prevention of hepatitis B virus infection in the United States:  
51 Recommendations of the Advisory Committee on Immunisation Practices. MMWR  
52 Report. 2018. [Retrieved from  
53  
54  
55  
56  
57  
58  
59  
60

<https://www.cdc.gov/mmwr/volumes/67/rr/rr6701a1.htm>. Available on February 20, 2018]

62. Hajarizadeh B, Wallace J, Richmond J, *et al*. Hepatitis B knowledge and associated factors among people with chronic hepatitis B. *Aust N Z J Public Health* 2015;**39**:563–8. doi:10.1111/1753-6405.12378
63. Upadhyaya N, Chang R, Davis C, *et al*. Chronic hepatitis B: Perceptions in Asian American communities and diagnosis and management practices among primary care physicians. *Postgrad Med* 2010;**122**:165–75. doi:10.3810/pgm.2010.09.2213
64. WHO. Guidelines for the prevention, care and treatment of persons with chronic hepatitis B infection. 2015;:166.
65. Yang T, Wu MC. Discrimination against hepatitis B carriers in China. *Lancet* 2011;**378**:1059. doi:10.1016/S0140-6736(11)61460-8
66. Yu L, Wang J, Zhu D, *et al*. Hepatitis B-related knowledge and vaccination in association with discrimination against hepatitis B in rural China. *Hum Vaccines Immunother* 2016;**12**:70–6. doi:10.1080/21645515.2015.1069932
67. Eldredge LKB, Markham CM, Ruiters RAC, Fernández MA, Kok G, Parcel GS. *Planning Health Promotion Programmes: An Intervention Mapping Approach (4<sup>th</sup> Edition)*. 2016. Jossey-Bass

**Table 1: Socio-Demographic Data of Participants with Hepatitis B**

| Pseudonyms | Occupation    | Year of Diagnosis | How participants were diagnosed      |
|------------|---------------|-------------------|--------------------------------------|
| PWHB 1     | Nursing       | 2014              | Self- initiated                      |
| PWHB 2     | Teacher       | 2011              | Hospital protocol for pregnant women |
| PWHB 3     | Caterer       | 2013              | Hospital protocol for pregnant women |
| PWHB 4     | Student       | 2016              | Physician initiated                  |
| PWHB 5     | Sales Manager | 2016              | Hospital protocol for pregnant women |
| PWHB 6     | Trader        | 2012              | Hospital protocol for pregnant women |

|         |            |      |                                      |
|---------|------------|------|--------------------------------------|
| PWHB 7  | Unemployed | 2015 | Self-initiated                       |
| PWHB 8  | Trader     | 2012 | Outreach screening programme         |
| PWHB 9  | Unemployed | 2016 | Outreach screening programme         |
| PWHB 10 | Banker     | 2008 | Outreach programme                   |
| PWHB 11 | Unemployed | 2010 | Outreach programme                   |
| PWHB 12 | Teacher    | 2015 | Self-initiated                       |
| PWHB 13 | Unemployed | 2011 | Hospital protocol for pregnant women |
| PWHB 14 | Housewife  | 2014 | Outreach programme                   |
| PWHB 15 | Trader     | 2009 | Self-initiated                       |
| PWHB 16 | Teacher    | 2010 | Self-initiated                       |
| PWHB 17 | Trader     | 2013 | Hospital protocol for pregnant women |
| PWHB 18 | Accountant | 2015 | Self-initiated                       |

**Table 2: Socio-Demographic Data of Healthcare Providers**

| Pseudonyms | Occupation | Year of practice |
|------------|------------|------------------|
| HCP 1      | Physician  | 4                |
| HCP 2      | Nurse      | 7                |
| HCP 3      | Nurse      | 9                |
| HCP 4      | Physicians | 3                |
| HCP 5      | Nurse      | 2                |
| HCP 6      | Nurse      | 4                |
| HCP 7      | Physicians | 5                |
| HCP 8      | Nurse      | 5                |
| HCP 9      | Physician  | 3                |

|        |           |    |
|--------|-----------|----|
| HCP 10 | Nurse     | 9  |
| HCP 11 | Nurse     | 3  |
| HCP 12 | Physician | 14 |
| HCP 13 | Physician | 4  |
| HCP 14 | Physician | 4  |
| HCP 15 | Physician | 9  |
| FGD 1  | Nurse     | 10 |
| FGD 2  | Nurse     | 3  |
| FGD 3  | Nurse     | 5  |
| FGD 4  | Nurse     | 9  |
| FGD 5  | Nurse     | 11 |
| FGD 6  | Nurse     | 3  |
| FGD 7  | Nurse     | 4  |
| FGD 8  | Nurse     | 20 |
| FGD 9  | Nurse     | 9  |
| FGD 10 | Nurse     | 3  |
| FGD 11 | Nurse     | 11 |
| FGD 13 | Midwife   | 8  |
| FGD 14 | Nurse     | 4  |
| FGD 15 | Midwife   | 9  |
| FGD 16 | Nurse     | 4  |
| FGD 17 | Nurse     | 7  |
| FGD 18 | Nurse     | 2  |
| FGD 19 | Nurse     | 7  |
| FGD 20 | Nurse     | 4  |
| FGD 21 | Nurse     | 2  |

|        |         |    |
|--------|---------|----|
| FGD 22 | Midwife | 7  |
| FGD 23 | Nurse   | 8  |
| FGD 24 | Nurse   | 20 |
| FGD 25 | Nurse   | 5  |
| FGD 26 | Nurse   | 3  |
| FGD 27 | Midwife | 11 |
| FGD 28 | Nurse   | 8  |
| FGD 29 | Nurse   | 1  |
| FGD 30 | Midwife | 14 |
| FGD 31 | Nurse   | 4  |
| FGD 32 | Nurse   | 3  |

## Supplementary material 1: Interview Guide

### PROTOCOL 1: HEPATITIS B RELATED STIGMA AND COPING INTERVIEW WITH PEOPLE WITH HEPATITIS B

#### 1. Introduction

- Welcome the interviewee and appreciate their time for the session.
- Explain what the study is about.
- Explain what the interview involves including the specific topics to be discussed.
- Inform the interviewee about confidentiality.
- Tell the interviewee that the discussion will be recorded and explain the rationale.
- Discuss voluntary participation- emphasize on their right to stop at any time without consequences.
- Give interviewee opportunity to ask questions including concerns.
- Signing of informed consent form by participant.
- Switch on audio-recorder.

#### 2. Background Information

- ✓ Age
- ✓ Gender
- ✓ Marital Status
- ✓ Occupation
- ✓ Year first diagnosed with HBV infection
- ✓ How participant got tested (self-request, general screening exercise, recommendation by physician, employment requirement, pre-marital requirement etc.)

#### 3. Experience of Stigma and Its Manifestations

- a. Can you share with me about a situation in which you were treated differently (stigma), or discriminated against because of your HBV positive status? **Probe**
- b. Where were you treated differently? **Probe**
- c. How often have you experienced this including negative reaction?
- d. What do you think causes people to treat you differently? **Probe**
- e. What do you think society perceive people with hepatitis B as? **Probe**
- f. How did these experiences affect you? **Probe**

### PROTOCOL 2: INTERVIEW OF HEALTHCARE PROVIDERS

1. Have you attended to someone with hepatitis B infection before?
2. If yes, can you share your experience/reaction with me? **Probe**
3. What do society perceive hepatitis B as? **Probe**
4. What do people perceive individuals with hepatitis B infection as? **Probe**

## COREQ (COnsolidated criteria for REporting Qualitative research) Checklist

A checklist of items that should be included in reports of qualitative research. You must report the page number in your manuscript where you consider each of the items listed in this checklist. If you have not included this information, either revise your manuscript accordingly before submitting or note N/A.

| Topic                                          | Item No. | Guide Questions/Description                                                                                                                              | Reported on Page No. |
|------------------------------------------------|----------|----------------------------------------------------------------------------------------------------------------------------------------------------------|----------------------|
| <b>Domain 1: Research team and reflexivity</b> |          |                                                                                                                                                          |                      |
| <i>Personal characteristics</i>                |          |                                                                                                                                                          |                      |
| Interviewer/facilitator                        | 1        | Which author/s conducted the interview or focus group?                                                                                                   |                      |
| Credentials                                    | 2        | What were the researcher's credentials? E.g. PhD, MD                                                                                                     |                      |
| Occupation                                     | 3        | What was their occupation at the time of the study?                                                                                                      |                      |
| Gender                                         | 4        | Was the researcher male or female?                                                                                                                       |                      |
| Experience and training                        | 5        | What experience or training did the researcher have?                                                                                                     |                      |
| <i>Relationship with participants</i>          |          |                                                                                                                                                          |                      |
| Relationship established                       | 6        | Was a relationship established prior to study commencement?                                                                                              |                      |
| Participant knowledge of the interviewer       | 7        | What did the participants know about the researcher? e.g. personal goals, reasons for doing the research                                                 |                      |
| Interviewer characteristics                    | 8        | What characteristics were reported about the interviewer/facilitator? e.g. Bias, assumptions, reasons and interests in the research topic                |                      |
| <b>Domain 2: Study design</b>                  |          |                                                                                                                                                          |                      |
| <i>Theoretical framework</i>                   |          |                                                                                                                                                          |                      |
| Methodological orientation and Theory          | 9        | What methodological orientation was stated to underpin the study? e.g. grounded theory, discourse analysis, ethnography, phenomenology, content analysis |                      |
| <i>Participant selection</i>                   |          |                                                                                                                                                          |                      |
| Sampling                                       | 10       | How were participants selected? e.g. purposive, convenience, consecutive, snowball                                                                       |                      |
| Method of approach                             | 11       | How were participants approached? e.g. face-to-face, telephone, mail, email                                                                              |                      |
| Sample size                                    | 12       | How many participants were in the study?                                                                                                                 |                      |
| Non-participation                              | 13       | How many people refused to participate or dropped out? Reasons?                                                                                          |                      |
| <i>Setting</i>                                 |          |                                                                                                                                                          |                      |
| Setting of data collection                     | 14       | Where was the data collected? e.g. home, clinic, workplace                                                                                               |                      |
| Presence of non-participants                   | 15       | Was anyone else present besides the participants and researchers?                                                                                        |                      |
| Description of sample                          | 16       | What are the important characteristics of the sample? e.g. demographic data, date                                                                        |                      |
| <i>Data collection</i>                         |          |                                                                                                                                                          |                      |
| Interview guide                                | 17       | Were questions, prompts, guides provided by the authors? Was it pilot tested?                                                                            |                      |
| Repeat interviews                              | 18       | Were repeat interviews carried out? If yes, how many?                                                                                                    |                      |
| Audio/visual recording                         | 19       | Did the research use audio or visual recording to collect the data?                                                                                      |                      |
| Field notes                                    | 20       | Were field notes made during and/or after the interview or focus group?                                                                                  |                      |
| Duration                                       | 21       | What was the duration of the interviews or focus group?                                                                                                  |                      |
| Data saturation                                | 22       | Was data saturation discussed?                                                                                                                           |                      |
| Transcripts returned                           | 23       | Were transcripts returned to participants for comment and/or                                                                                             |                      |



| Topic                                  | Item No. | Guide Questions/Description                                                                                                        | Reported on Page No. |
|----------------------------------------|----------|------------------------------------------------------------------------------------------------------------------------------------|----------------------|
|                                        |          | correction?                                                                                                                        |                      |
| <b>Domain 3: analysis and findings</b> |          |                                                                                                                                    |                      |
| <i>Data analysis</i>                   |          |                                                                                                                                    |                      |
| Number of data coders                  | 24       | How many data coders coded the data?                                                                                               |                      |
| Description of the coding tree         | 25       | Did authors provide a description of the coding tree?                                                                              |                      |
| Derivation of themes                   | 26       | Were themes identified in advance or derived from the data?                                                                        |                      |
| Software                               | 27       | What software, if applicable, was used to manage the data?                                                                         |                      |
| Participant checking                   | 28       | Did participants provide feedback on the findings?                                                                                 |                      |
| <i>Reporting</i>                       |          |                                                                                                                                    |                      |
| Quotations presented                   | 29       | Were participant quotations presented to illustrate the themes/findings?<br>Was each quotation identified? e.g. participant number |                      |
| Data and findings consistent           | 30       | Was there consistency between the data presented and the findings?                                                                 |                      |
| Clarity of major themes                | 31       | Were major themes clearly presented in the findings?                                                                               |                      |
| Clarity of minor themes                | 32       | Is there a description of diverse cases or discussion of minor themes?                                                             |                      |

Developed from: Tong A, Sainsbury P, Craig J. Consolidated criteria for reporting qualitative research (COREQ): a 32-item checklist for interviews and focus groups. *International Journal for Quality in Health Care*. 2007. Volume 19, Number 6: pp. 349 – 357

**Once you have completed this checklist, please save a copy and upload it as part of your submission. DO NOT include this checklist as part of the main manuscript document. It must be uploaded as a separate file.**

# BMJ Open

## The challenge of stigma among people with chronic Hepatitis B in Ghana: a qualitative study

|                                 |                                                                                                                                                                                                                                                                                       |
|---------------------------------|---------------------------------------------------------------------------------------------------------------------------------------------------------------------------------------------------------------------------------------------------------------------------------------|
| Journal:                        | <i>BMJ Open</i>                                                                                                                                                                                                                                                                       |
| Manuscript ID                   | bmjopen-2018-025503.R1                                                                                                                                                                                                                                                                |
| Article Type:                   | Research                                                                                                                                                                                                                                                                              |
| Date Submitted by the Author:   | 04-Feb-2019                                                                                                                                                                                                                                                                           |
| Complete List of Authors:       | Adjei, Charles; University of Ghana, Community Health Nursing Department<br>Stutterheim, Sarah; Maastricht University, Department of Work and Social Psychology<br>Naab, Florence; University of Ghana, Department of Maternal and Child Health<br>Ruiters, R; Maastricht University, |
| <b>Primary Subject Heading</b>: | Gastroenterology and hepatology                                                                                                                                                                                                                                                       |
| Secondary Subject Heading:      | Gastroenterology and hepatology, Infectious diseases, Public health                                                                                                                                                                                                                   |
| Keywords:                       | Hepatitis B, Stigma, Challenge, Ghana, Qualitative study, INFECTIOUS DISEASES                                                                                                                                                                                                         |
|                                 |                                                                                                                                                                                                                                                                                       |

SCHOLARONE™  
Manuscripts

1  
2  
3 **The challenge of stigma among people with chronic Hepatitis B in Ghana: a qualitative**  
4 **study**  
5  
6  
7

8 Charles Ampong Adjei - **Corresponding Author**  
9 (PhD student, Maastricht University, The Netherlands)  
10 Department of Community Health Nursing  
11 School of Nursing  
12 College of Health Sciences  
13 University of Ghana  
14 chadjei@ug.edu.gh  
15  
16  
17  
18

19 Dr. Sarah E. Stutterheim  
20 Department of Work and Social Psychology  
21 Maastricht University, The Netherlands  
22 Email: s.stutterheim@maastrichtuniversity.nl  
23  
24  
25

26 Dr. Florence Naab  
27 Department of Maternal and Child Health  
28 School of Nursing  
29 College of health Sciences  
30 University of Ghana  
31 +23324522332  
32 [fnaab@ug.edu.gh](mailto:fnaab@ug.edu.gh)  
33  
34  
35

36 Prof. Dr. Robert A.C. Ruiter  
37 Department of Work and Social Psychology  
38 Maastricht University, The Netherlands  
39 Email: r.ruiter@maastrichtuniversity.nl  
40  
41  
42

43 **ABSTRACT**

44 **Objective:** This study explored the perspectives of people with chronic Hepatitis B and  
45 healthcare providers on the beliefs contributing to Hepatitis B stigma in Northern and Southern  
46 Ghana and the ways in which Hepatitis B stigma manifests.  
47

48 **Design:** We used an exploratory qualitative design with a purposive sampling technique. Face-  
49 to-face interviews and focus group discussions were conducted. Data were processed using  
50 QSR Nvivo version 10.0 and analysed using inductive thematic analysis.  
51

52 **Settings:** Participants were recruited from one tertiary and one regional hospital in Ghana  
53 between February and November, 2017.  
54

55 **Participants:** Overall, 18 people with chronic Hepatitis B and 47 healthcare providers (primary  
56 care physicians, nurses, and midwives) between the ages of 21 and 57 years participated in the  
57 study.  
58

59 **Results:** The findings of the study showed that people with chronic Hepatitis B are faced with  
60 stigma in their socio-cultural context and the healthcare environment. Three main beliefs

underlying stigma were found: (1) the belief that Hepatitis B is highly contagious; (2) the belief that Hepatitis B is very severe; and (3) the belief that Hepatitis B is caused by curses. Stigmatisation manifested as avoidance and social isolation (discrimination). Also, in healthcare settings, excessive cautiousness, task-shifting, procedure avoidance, and breaches of confidentiality were reported.

**Conclusions:** Given the prevalence of incorrect knowledge, as reflect in the beliefs about Hepatitis B, we recommend public awareness campaigns that emphasise Hepatitis B transmission routes. Also, given the manifestations of the stigma in the healthcare settings, we believe that a continuing professional development programme on the aetiology of Hepatitis B is called as this can enhance the knowledge of the healthcare providers in parallel to public awareness campaigns. Also, effective theory and evidence-based stigma reduction interventions are recommended.

**Key words:** Stigma, challenge, chronic Hepatitis B, infection, Ghana.

#### **Strengths and limitations of this study**

- This study is the first to document Hepatitis B stigma in Ghana.
- Triangulation of the data across different settings, people with chronic Hepatitis B and different categories of healthcare providers (primary physicians, nurses, and midwives) assisted in understanding and describing the phenomenon in terms of depth and breadth and further ensured the trustworthiness of the findings.
- Although this study provided insight into the beliefs contributing to Hepatitis B stigma and the manifestations of stigma in Ghana, we recommend confirming these results quantitatively in a large representative sample of the Ghanaian population.
- We recognise the possibility of recall bias since the PWHB had lived with the disease for a period between 1 and 7 years.

## **INTRODUCTION**

Hepatitis B viral (HBV) infection remains a public health challenge affecting approximately 248 million people worldwide.<sup>1</sup> Globally, about 887,000 deaths attributable to complications of Hepatitis B (i.e. hepatocellular carcinoma and cirrhosis) were recorded in 2015.<sup>2</sup> Sub-Saharan Africa is disproportionately affected<sup>2</sup> as evidenced by the high HBV prevalence in the region.<sup>3-6</sup>

Within the Ghanaian context, several studies have estimated Hepatitis B prevalence above 8%.<sup>3</sup><sup>7-12</sup> In fact, the most recent prevalence estimate of Hepatitis B in Ghana is 12.3%.<sup>3</sup> HBV transmission occurs through several means.<sup>1</sup><sup>13</sup> In high endemic countries such as Ghana, Hepatitis B is predominantly transmitted perinatally.<sup>13</sup> Other practices, including but not limited to, unsafe injections, blood transfusions, dialysis, needle stick injuries, and intimate non-sexual contact are postulated as a vehicle for HBV transmission.<sup>13</sup> Perhaps, challenges

1  
2  
3 such as the high cost of testing and treatment, poor referral systems, a lack of HBV management  
4 guidelines, and inadequate infrastructure for screening contribute to the high prevalence of  
5 Hepatitis B in developing countries, including Ghana.<sup>14-16</sup>  
6  
7

8 Generally, diseases with some risk of transmission are associated with stigma.<sup>17 18</sup> This is well  
9 reported for conditions such as tuberculosis, HIV, and mental illnesses.<sup>19-22</sup> Similarly, people  
10 with chronic Hepatitis B (PWHB) are likely to be stigmatised.<sup>23-29</sup> Goffman<sup>30</sup> in his seminal  
11 work described stigmatisation as a socially and culturally constituted process whereby a person  
12 is first labelled as different and then devalued, leading to status loss and discrimination. Link  
13 and Phelan<sup>31</sup> also outlined three main motivations for stigmatisation namely: exploitation and  
14 domination (keeping people down), enforcement of social norms (keeping people in), and  
15 avoidance of diseases (keeping people away). Exploitation and domination occur when a group  
16 dominate or exploit another by virtue of their wealth, power and high social status. On the other  
17 hand, enforcement of social norm centres on written and unwritten rules that people are  
18 expected to follow and violaters of these norms suffer the consequences.<sup>31</sup> However, because  
19 Hepatitis B is an infectious disease, disease avoidance as a motivation for stigmatisation is  
20 likely. This is supported by evidence from Canada and Pakistan showing that PWHB  
21 experience diverse degrees of stigma because of the perceived infectiousness of HBV.<sup>32-33</sup>  
22 Stigmatisation may also be motivated by a desire to enforce social norms as Hepatitis B has  
23 been reported to be considered the consequence of promiscuous behaviour.<sup>29 34 35</sup> In additon,  
24 ignorance about HBV routes of transmission is documented to contributes to Hepatitis B  
25 stigma.<sup>36</sup>  
26  
27  
28  
29  
30  
31  
32  
33

34 The stigmatisation of PWHB manifests in many ways. Previous studies conducted outside of  
35 Ghana have reported social exclusion, problems with close relations including friends and  
36 families, and loss of employment as some of the ways in which Hepatitis B stigma presents.<sup>33</sup>  
37 <sup>35-37</sup> Hepatitis B stigmatisation also occurs across a number of settings and contexts, including  
38 health care settings.<sup>38 39</sup> For example, Wada and colleagues<sup>38</sup> found that some healthcare  
39 providers in Japan were reluctant to care for patients with chronic Hepatitis B due to fear of  
40 infection.  
41  
42  
43

44 The stigmatisation of PWHB has many consequences. It has been found to create an  
45 environment of secrecy and denial, can lead to depression, and can be a barrier to health care  
46 seeking, including screening and treatment.<sup>28 32 39-41</sup> Additionally, fear of being stigmatised,  
47 rejected, and discriminated against has been found to motivate PWHB to conceal their positive  
48 status from family and friends,<sup>25 39 42 43</sup> and non-disclosure of one's HBV status can be a barrier  
49 to preventing transmission to others.<sup>44</sup> Further, stigmatisation can serve to deter people at risk  
50 for HBV infection from being tested, obtaining treatment when eligible, and from seeking  
51 assistance for risk reduction.<sup>28 32 41</sup>  
52  
53  
54  
55

56 Given the high prevalence of Hepatitis B in Ghana,<sup>3</sup> and the paucity of evidence on Hepatitis  
57 B stigma in Ghana, this study sought to explore the perspectives of PWHB and HCPs on the  
58 beliefs contributing to Hepatitis B stigma in Northern and Southern Ghana and the ways in  
59 which Hepatitis B stigma manifests. Understanding this phenomenon is important as it can  
60

1  
2  
3 inform the design of effective Hepatitis B and stigma prevention interventions and policies in  
4 Ghana and beyond.  
5  
6

## 7 **METHODS**

### 8 **Study Design**

9  
10 An exploratory qualitative design was used to explore the perspectives of PWHB and HCPs on  
11 Hepatitis B stigma in Ghana. This design was deemed best suited for this study because there  
12 is very limited documented evidence on Hepatitis B stigma in Ghana.<sup>45</sup> Ethical approval was  
13 given by the Korle-Bu Institutional Review Board (Approval number KBTH-IRB  
14 00092/2016).  
15  
16

### 17 **Study Setting**

18  
19 The study was conducted in two public health facilities in Ghana. Ghana is a tropical country  
20 on the west coast of Africa.<sup>46</sup> According to the most recent census, the population of Ghana  
21 was about 28, 308, 301 in 2016.<sup>47</sup> There are ten administrative regions in the country. Each of  
22 the regions has a regional hospital which serves as a referral centre for the district hospitals.  
23 Also, the country has three main teaching hospitals.<sup>48</sup> A special clinic for patients with liver  
24 conditions, including Hepatitis B, are run at the tertiary hospitals whereas PWHB are mostly  
25 treated as out-patient cases in regional hospitals. One tertiary hospital in the south and one  
26 regional hospital in the North were selected for the study. In most Ghanaian societies, people  
27 attach different beliefs to the cause of their illness depending on their religious affiliation. For  
28 example, Christians and Moslems recognise God as the one who controls life events and also  
29 has the power to deliver people from bad situations including illnesses. On the other hand,  
30 those with traditional beliefs also attribute the cause of unusual event including illness to  
31 consequences of a sin against the gods.  
32  
33  
34  
35  
36

### 37 **Study Population**

38  
39 We recruited PWHB and HCPs including primary physicians, nurses, and midwives in both  
40 Northern and Southern Ghana for the purposes of data source triangulation. Ensuring  
41 triangulation was imperative to understanding the Hepatitis B stigma comprehensively and to  
42 further validating information obtained from the participants.<sup>49</sup> Inclusion of HCPs was deemed  
43 appropriate as they play an important role in the provision of care to PWHB. Also, some of the  
44 manifestations of stigma occur in the clinical setting and therefore we believed that they were  
45 in a better position to share those experiences with us.  
46  
47

### 48 **Participant Eligibility**

#### 49 **Inclusion Criteria**

50  
51 PWHB were included in the study if they were (1) 18 years or older, and (2) had tested Hepatitis  
52 B surface antigen (HBsAg) positive at least 6 months prior to recruitment. The inclusion  
53 criterion for HCPs was (1) having cared for patients with Hepatitis B in a healthcare setting.  
54

#### 55 **Exclusion Criteria**

56  
57 PWHB who were in the terminal stage of the disease and had less energy to go through the  
58 interview session were excluded. However, only one person in the terminal stage of the disease  
59 was seen in the tertiary hospital but was not recruited because he was in a state of dyspnoea  
60

1  
2  
3 (breathlessness). Also, HCPs who had less than three months working experience in a  
4 department where services are provided for PWHB were excluded as these HCPs might not  
5 have enough experience with Hepatitis B.  
6  
7

### 8 **Sampling Method and Data Collection Procedure**

9  
10 A purposeful sampling technique was employed.<sup>50 51</sup> First, posters with details of the study,  
11 including information about the purpose of the study, assurance of the voluntary nature of the  
12 study, as well as the procedure for registration, were advertised in the selected health facilities.  
13 In addition, PWHB and HCPs were also recruited directly through nurses at the health facilities.  
14 PWHB recruited through the advertisement were 6 and the remaining 12 were recruited through  
15 nurses in the hospitals. On the other hand, 10 HCPs were recruited through advertisement and  
16 37 of the HCPs were recruited through nurses in the hospitals. Overall, 16 participants were  
17 recruited through the advertisements and 49 through nurses. Two PWHB refused to participate.  
18 One cited time constraints as the reason and the other declined to provide a reason. Another 5  
19 HCPs did not honour the invitation as a result of an emergency call at work or conflicting  
20 schedule with other unplanned social events. PWHB participated in semi-structured in-depth  
21 interviews. HCPs were either interviewed or participated in a focus group discussion (FGD).  
22 The combination of interviews and FGD for HCP assisted in understanding and describing the  
23 phenomenon comprehensively in terms of depth and breadth and further ensured the  
24 trustworthiness of the findings (Lambert & Loiselle, 2008). However, given the sensitive nature  
25 of the topic and the extent to which responses to the study questions could be quite personal  
26 for PWHB, PWHB were not recruited for FGDs. Interviews were deemed more appropriate.<sup>52</sup>  
27 The interviews and FGD were conducted by the first author (CAA) who is a PhD student with  
28 a good background in qualitative data collection including interviews and FGD. He is also fluent  
29 in English and the local Ghanaian language (Twi) but all interviews and FGD were done in  
30 English. Two days before the interview/FGD, participants were contacted by telephone to  
31 remind them of the appointment. The interviews/FGDs were conducted mostly in the homes  
32 of those with chronic Hepatitis B (under trees) and the workplace of HCPs (nurses' stations  
33 and physician's consulting rooms). The informed consent form was signed by all participants  
34 following an explanation of the purpose of the study and explicit mention of the confidential  
35 and voluntary nature of their participation. In addition, permission was sought from participants  
36 to record the interview/FGD. Field notes were taken during the interviews and the FGDs.  
37  
38  
39  
40  
41  
42  
43  
44  
45  
46

47 Data were collected between February and November 2017. In total, 18 in-depth interviews  
48 were conducted with PWHB and 15 in-depth interviews with HCPs. Additionally, 4 FGD with  
49 a composition of 8 HCPs in each group were conducted. The interviews involving PWHB and  
50 HCPs lasted between 45 minutes and 1 hour whereas the FGDs with HCPs lasted  
51 approximately 1 hour and 15 minutes. Data saturation was reached after the interview of the  
52 14<sup>th</sup> PWHB and 12<sup>th</sup> HCP.<sup>53</sup>  
53  
54  
55

### 56 **Research Instrument**

57 The interview and FGD were guided by a semi-structured protocol with the flexibility to probe.  
58 The protocol was developed based on empirical literature on Hepatitis B stigma<sup>54</sup> and then  
59 reviewed by an expert in stigma (SS). Subsequently, the interview protocol was piloted with  
60



1  
2  
3 two PWHB and two HCPs. Topics explored during the interviews with PWHB include (1)  
4 participants experiences being treated poorly or differently because of their HBV sero-  
5 positivity and the settings in which those experiences took place (2) perceived reasons for being  
6 treated poorly or differently (3) the impact of those experiences. Topics explored in the  
7 interviews and FGDs with HCPs were (1) perceptions about Hepatitis B, (2) the extent to which  
8 they have provided care to someone with Hepatitis B and, their reactions (3) possible reasons  
9 for negative reactions to PWHB. A detailed interview protocol can be found in the  
10 supplementary material 1.  
11  
12  
13  
14

### 15 **Data Analysis**

16 Data were processed with QSR Nvivo version 10.0 and analysed using inductive thematic  
17 analysis.<sup>55</sup> The first author (CAA) played and listened to the audio recordings and transcribed  
18 verbatim. The first transcribed data were coded by two of the authors (CAA and SS) followed  
19 by discussions on the individual codes, categories, and themes generated. At the end, a  
20 consensus was reached on the codes, and the main themes and sub-themes were documented.  
21 Preliminary findings were checked with two representatives of the study population to confirm  
22 if the findings were in lines with their views and experiences. Two main themes and eight sub-  
23 themes emerged from the data (summary presented in table 1).  
24  
25  
26  
27

### 28 **Patient/Public Involvement**

29 Patients and the public were not involved in the development of the research questions, the  
30 design, recruitment, and conduct of the study. The study results will be shared with the  
31 participants and other relevant stakeholders through various social media handles, and  
32 conference presentations.  
33  
34  
35  
36

## 37 **RESULTS**

### 38 **Demographic Characteristics**

39 We recruited, in total, 18 PWHB and 47 HCPs, of which 8 were physicians, 34 were nurses,  
40 and 5 were midwives. PWHB were between 21 and 57 years of age and the HCPs were between  
41 23 and 49 years of age. PWHB had lived with the infection between 1 and 7 years and had been  
42 diagnosed through one of the following means: self-initiated, physician initiated, during  
43 outreach screening services, and as a result of hospital protocol for pregnant women. The HCPs  
44 had practised medicine, nursing, or midwifery between 1 and 20 years. Detailed socio-  
45 demographic data for PWHB and HCPs are presented in table 2 and table 3 respectively.  
46  
47  
48  
49  
50

### 51 **Beliefs About Hepatitis B**

52 PWHB and HCP reported that, in Ghana, Hepatitis B is considered highly contagious and very  
53 severe. Additionally, it is sometimes associated with curses. These themes are described in  
54 detail below.  
55  
56  
57  
58  
59  
60

### Hepatitis B as highly contagious

It was widely reported by participants with Hepatitis B that people in their community believe that Hepatitis B can be acquired through casual contact such as handshaking, touching, and eating from the same bowl with an infected person. These modes of transmission were reported to have created fear and panic within the Ghanaian social arena. The situation was further posited to be compounded by the belief that sweat is a medium by which Hepatitis B can be transmitted. One participant with chronic Hepatitis B said,

*“It is well known that when someone with Hepatitis B’s sweat touches you, you can also get the disease or when he shares the same eating bowl with you, you can be infected with the virus by his saliva. This information scares many people and therefore as soon as they get to know you have Hepatitis B, they tend to dissociate themselves from you.”* (PWHB, South-IDI 2<sup>1</sup>)

Another participant with chronic Hepatitis B also recounted his experience in school,

*“When we were in school, we knew that the virus could be found in human sweat. With this understanding, when someone meets you lying on his mattress, he becomes very furious because you have the tendency of infecting him with the virus. If you use someone’s spoon or cup and he sees it, that is it, you will have it forever. He will prefer to buy a new one than to use the one used by you to get the virus.”* (PWHB, North-IDI 7)

According to one PWHB, the fear of infection on the part of others is the result of a lack of knowledge. She said,

*“There is a lot of false information about Hepatitis B in the public domain which put fear in everyone. Some have the mind-set that you can get the virus from an infected person through a handshake. This makes people alarmed when they know you have the virus.”* (PWHB, South-IDI 11)

Similarly, a HCP recounted her experience with a family that nearly ex-communicated their daughter because of fear of possible transmission of the virus to other relations.

*“I had a fourteen year old pregnant lady who had Hepatitis B. I counselled her and the mother. When they returned to the house, the father denied the girl opportunity to stay with them to prevent others getting infected. The father thought that people with Hepatitis B are not supposed to eat with anyone and the person must use a separate bowl, cups etc. Based on this, he could not accept the girl in the house for fear of passing on the infection to the entire family.”* (HCP, North-FGD 21)

The belief that Hepatitis B is easily transmitted was also held by HCPs. Some reported that because of this they have assigned unique names to chronic Hepatitis B positive patients for

---

<sup>1</sup> All names have been changed to protect the identity of participants

1  
2  
3 easy identification and notification. Also, HCPs reported treating PWHB differently because  
4 they fear possible infection. Some of the reactions from HCP are as follows,  
5  
6

7 *“I am a midwife and in the ward, we have given those with Hepatitis B names. We call them*  
8 *candidates. When we identify you as a candidate, most midwives don’t want to touch such a*  
9 *person. Even we ignore their money because we believe that where she kept the money sweat*  
10 *could get to it and therefore we don’t like it.”* (HCP, North-FGD 13)  
11  
12

13  
14 Fear of infection on the part of HCPs was also said to result in patients with chronic Hepatitis  
15 B being neglected by some HCPs.  
16

17  
18 *“We had one Hepatitis B case that came in a coma state and if you look at the severity of the*  
19 *condition, most of the staff were not willing to provide any service for the patient. The patient*  
20 *was restless and ended up losing his life after three days. After he died, nobody even wanted*  
21 *to go closer to his dead body because we were afraid that we could be infected.”* (HCP, South-  
22 IDI 10)  
23  
24

### 25 **Hepatitis B as very severe**

26  
27 Participants also indicated that many people think Hepatitis B is not only easily transmittable  
28 but very severe. Hepatitis B was claimed to be seen as a condition with poor prognosis which  
29 eventually leads to death. One participant with chronic Hepatitis B shared her view,  
30  
31

32 *“Everyone is afraid of the Hepatitis B virus. Since it is known that it kills, no one wants to have*  
33 *anything to do with people who have it. Many people are aware of HIV but because it is well*  
34 *publicised that Hepatitis B is more deadly than HIV, people are terrified when getting closer*  
35 *to those who are known to have Hepatitis B.”* (PWHB, South-IDI 18).  
36  
37

38  
39 Another HCP said, *“People who are aware of Hepatitis B know that it kills. They are very*  
40 *cautious when they hear that someone has Hepatitis B.”* (HCP, South-IDI 2).  
41  
42

43  
44 Participants emphasized the severity by comparing Hepatitis B to HIV/AIDS as illustrated by  
45 this quote: *“People say it is deadly, it kills faster than HIV/AIDS.”* (HCP, South-IDI 12)

46 A belief that was said to contribute to the perceived severity of Hepatitis B is the belief that  
47 Hepatitis B is incurable.  
48

49 *“What scares us is the information that Hepatitis B has no cure. It therefore means that is*  
50 *either you die with it or you live with it forever. HIV which is a popular disease seems to be*  
51 *better than Hepatitis B because there are drugs to keep you alive when you get it.”* (PWHB,  
52 North-IDI 14)  
53  
54  
55  
56  
57  
58  
59  
60

### Hepatitis B as a curse

Another belief held about Hepatitis B is that it affects people who have been cursed for their wrong doing. This was reported to be based on the fact that people in advanced stages of Hepatitis B clinically present with ascites, jaundice, and oedema, and these presentations are linked to punishment from gods in the Ghanaian context. According to a number of the participants, people in their community believe that the swollen abdomen and feet that characterise Hepatitis B suggest that those infected are cursed for not respecting or taking care of their parents. This was vividly reported by some HCPs in Northern Ghana where tradition and culture are highly upheld.

*“Ascites [enlarged abdomen] and oedema [swollen feet] is one thing that society perceives as caused by curses. Once they see it, they believe that the person has been cursed. The family members don’t want to get closer since they feel that it is happening because of the person’s bad deeds.”* (HCP, North-FGD 16)

Participants spoke of how, in certain circumstances, family members seek alternative treatment for Hepatitis B when they are convinced that the gods are the cause of the complications. They seek spiritual support and this often delays health care seeking. One HCP recounted her experience with her father who had been Hepatitis B positive.

*“My father had Hepatitis B and died. He grew very lean, his stomach bloated and they said it was a curse from the family. He wasn’t taken to the hospital and he was neglected by his siblings. He was moved from one prayer camp to the other, one church to the other thinking he would be cured but when he was brought back to the house, the infection was worse than before. His eyes were very yellowish and he was very lean.”* (HCP, South-IDI 11)

Furthermore, a report by an HCP revealed some of the rituals that are performed in the healthcare settings before the corpse of someone with chronic Hepatitis B is taken out for a burial. This according to the participant is done to prevent possible transmission of the disease to the family members of the deceased.

She said,

*“Sometimes when they [PWHB] die, the relatives perform some rituals to cleanse themselves before the body is conveyed to the morgue.”* (HCP, North-IDI 6)

### Manifestations of Stigma

In addition to reporting common beliefs about Hepatitis B in Ghana, participants also reported a number of ways in which Hepatitis B stigma manifests, both in general and specifically in healthcare settings.

### Avoidance

Participants reported various ways in which stigmatisation was expressed toward PWHB. Avoidance was a typical reaction reported. A participant with chronic Hepatitis B recounted her experience following diagnosis and disclosure of her status to her close relation.

1  
2  
3  
4  
5  
6  
7  
8  
9  
10  
11  
12  
13  
14  
15  
16  
17  
18  
19  
20  
21  
22  
23  
24  
25  
26  
27  
28  
29  
30  
31  
32  
33  
34  
35  
36  
37  
38  
39  
40  
41  
42  
43  
44  
45  
46  
47  
48  
49  
50  
51  
52  
53  
54  
55  
56  
57  
58  
59  
60

*“As soon as they see that you have Hepatitis B, they start avoiding you; something you pick, they won’t pick; something you have used, they don’t want to get closer to it. At first, I used to do things together with my uncle. Whenever he is eating, I can put my hand in it and eat with him. After I told him that I was Hepatitis B positive, he avoids me completely. Anytime he returns from work he just greets me and enters his room. I don’t see him to chat and joke like the way we used to.” (PWHB, South-IDI 3)*

Another participant with chronic Hepatitis B also said,

*“Hmmm! When my household members see me, they change their conversation. When they are chatting and I go to sit down, then they get up. They treat you as if you have shit on yourself. Everyone leaves you with so many excuses.” (PWHB, North-IDI 16)*

Avoidance was also reported to occur in the healthcare settings. One HCP shared how she avoided a colleague after learning she had Hepatitis B.

*“I was working at one sub-district and the staff were friendly and so we were eating together. One day, we were chatting and a colleague said, ‘She is Hepatitis B positive’. From that day, I never ate with them again because I felt uncomfortable. Knowing that the virus can be in the saliva and there could be exchange of saliva while eating from the same bowl, I was afraid of getting the infection so I stopped eating with them.” (HCP, North-FGD 8)*

Some of the avoidance was said to be based on speculations. People who were known or suspected to have a sexual relationship with persons with Hepatitis B were also said to be avoided.

*“I was in a community health centre with subordinates who were young nurses. They were eating together, doing everything together and very close until there was a death of a man. It came out that the person died of Hepatitis B and one of the nurses was said to be the girlfriend. After the funeral, the girl was deserted. The eating together could not continue and, in fact, the girl became very worried and miserable because the relationship with her colleagues changed.” (HCP, North-FGD 30)*

Another participant narrated a similar experience,

*“I stayed in a compound house with a certain lady who was befriending someone positive of Hepatitis B. Later, somebody in the yard got to know that the man was Hepatitis B positive and the news spread in the yard. Nobody was coming near her veranda because they concluded that once the guy had Hepatitis B then the lady has also gotten it. When they are sitting in the yard and she comes to sit, they all enter their rooms. Nobody was going close to her until she had a quarrel with one of the residents and she was insulted as having Hepatitis B. That was when the lady got to know why everybody was avoiding her.” (HCP, North-FGD 4)*

### Social isolation

Participants also reported social isolation as manifestations of stigma. They reported that, in some senior high schools where students reside in the dormitories, those with chronic Hepatitis B are isolated from their peers in an effort to prevent possible transmission of the virus to other students. One HCP narrated an encounter she had with a man, whose son suffered this treatment in school,

*“I met one man who was lamenting that his son in a senior high school was ejected from the school dormitory because he tested Hepatitis B positive. The boy has been isolated and now sleeps in the classroom. The school authorities feel that, if they don’t isolate those who are positive, they will end up infecting everybody and more students. Parents are compelled to get houses outside school campus for such students.”* (HCP, North-FGD 14)

Participants also indicated that, in some parts of Northern Ghana, people who test Hepatitis B positive are confined to their rooms. They are treated as outcasts and have many social restrictions. Additionally, it was reported that some PWHB have family roles taken from them and are denied participation in family functions. A participant with chronic Hepatitis B shared her observations,

*“The person is isolated when family members are made aware of his/her Hepatitis B positive status. If they were cooking in one pot, the person ceases to cook with them. They give them their own room and sometimes put the person very far away. They [PWHB] don’t move around and always stay inside mourning their dead when not dead. They only come and throw their food to them to take and eat. They won’t let you feel that you are also normal like them.”* (PWHB, North-DI 8)

The social isolation of PWHB was also reported to occur in the healthcare settings as well. In this context, social isolation occurred because, according to the participants, people tend to believe, as reported above, that an infected person can pass the infection to others through sweat. This was claimed to motivate HCPs actions to separate PWHB from other patients. *“We put them [PWHB] at the extreme corner where no one goes there.”* (HCP, North-IDI 3)

Another PWHB shared his thoughts,

*“Many people see those with Hepatitis B as sources of infection because they think it can be transmitted through sweat. They are sometimes afraid to go closer to them especially when the person looks jaundiced (yellowish) and the stomach becomes big. Everyone becomes scared and they may treat the person like a leper by distancing themselves from the person.”* (PWHB, South-IDI 15)

The public reaction toward PWHB was said to worsen when they exhibit severe forms of jaundice,



1  
2  
3  
4  
5  
6  
7  
8  
9  
10  
11  
12  
13  
14  
15  
16  
17  
18  
19  
20  
21  
22  
23  
24  
25  
26  
27  
28  
29  
30  
31  
32  
33  
34  
35  
36  
37  
38  
39  
40  
41  
42  
43  
44  
45  
46  
47  
48  
49  
50  
51  
52  
53  
54  
55  
56  
57  
58  
59  
60

*“Some people feel that when you have Hepatitis B and you look yellowish, it means that the viruses are too many in your blood. At that point, everyone withdraws. When the person dies, they don’t waste time to keep his/her body for proper funeral but quickly bury the person. I have seen a number of cases like that in my village.”* (PWHB, North-IDI 3)

Furthermore, participants indicated that family members sometimes distance themselves because they consider it as way of escaping the wrath of the gods, reflecting again the belief that Hepatitis B is a curse from the gods,

*“People fear to be closer to someone who has been cursed so they withdraw from the person in order not to attract the anger of the gods.”* (HCP, North-FGD 27)

### **Stigmatisation in health care settings**

Specific manifestations of stigma in health care settings were reported as well. There, stigma not only manifested as avoidance and social isolation as outlined above, but also as excessive cautiousness, task-shifting, procedure avoidance, and breaches of confidentiality.

#### **Excessive cautiousness by HCPs**

Participants reported that excessive cautiousness was taken by HCPs when provided care to patients with chronic Hepatitis B. This was evidenced by the use of extreme infection prevention precautions. In some instances, HCPs stated that they wore extra gloves to prevent possible acquisition of the virus,

*“Anytime I am managing someone with Hepatitis B, I am extra careful. I put on more than one gloves and also wash my hands regularly.”* (HCP, South-FGD 20)

Another HCP explained how this is related to the belief that Hepatitis B is highly contagious, *“When you get to know that the patient has Hepatitis B infection, the mind-set changes outright. You become very cautious because you are afraid of getting infected.”* (HCP, South-IDI 9)

Notwithstanding, some HCPs indicated that their actions were dependent on the kind of procedure.

*“Sometimes it depends on what you are going to do for the person. For instance, when I am going to empty the urine bag, I put on three gloves. But when I am feeding them, I don’t do that because I know I am not coming into contact with anybody’s fluid.”* (HCP, South-FGD 22)

Some HCPs reported that the negative perception about Hepatitis B compromises, to some extent, the quality of care individuals with chronic Hepatitis B are expected to receive.

*“I’ve seen a couple of cases where midwives were very careful not wanting to assist the delivery of Hepatitis B positive woman. Even the baby that was born, they were very sceptical touching her and the mother. The way they handled them and the way they talked about it - “whispering”*



1  
2  
3 *when they are handing over - sometimes it is very obvious that they are stigmatising the client.*”  
4 (HCP, South- IDI 1)  
5  
6

### 7 **Task-shifting and procedure avoidance**

8 The majority of the HCPs indicated that postponement of procedures and task shifting are  
9 common when caring for PWHB. In some instances, HCPs failed to perform nursing  
10 procedures but, rather, delayed care when the patient was identified as having chronic Hepatitis  
11 B. This too was reported to occur because of the perceived contagiousness of Hepatitis B.  
12  
13

14  
15 *“When we see them [PWHB] at the critical stage, some vomiting blood and coughing out*  
16 *blood, you will see some nurses postponing procedures because they think that they can be*  
17 *infected.”* (HCP, North-FGD 5)  
18  
19

20 Another participant said,

21 *“I ever sent a patient to the hospital. The intravenous line infiltrated and the nurses were*  
22 *supposed to change it. I was amazed that no nurse was ready to do it. This nurse will say to the*  
23 *other to go and do it. Another said let’s wait for the doctor and giggled. So I was getting afraid.*  
24 *Is this person having HIV or what that no one seems interested working on him?”* (HCP, North-  
25 FGD 23)  
26  
27

28  
29 A number of the participants indicated that some HCPs shift their tasks such that student nurses  
30 have to perform them. A nurse recounted her experience during her formal clinical training,  
31  
32

33 *“During our clinical placement, when cases like Hepatitis B are admitted, it was we, the*  
34 *students, that the nurses used to send to go and manage those clients. In fact, they won’t let*  
35 *you know the exact condition until you cannot do something. Even that, when one of them is*  
36 *coming to help you, the gloves will be more than five. Even with that, she will still come and*  
37 *stand and say, “hold this place”, “do that”. She will not do it. So, if they begin to do that and*  
38 *you also take the patient’s folder and you see that it is Hepatitis B, then you advise yourself”*  
39 (HCP, North - FGD 19)  
40  
41  
42

43 Another nurse said,

44  
45  
46 *“During my first clinical attachment as a student nurse, Hepatitis B patients were put in the*  
47 *cubicle or an isolated veranda. Anytime they [nurses] were to attend to them, either during*  
48 *dressing, checking of vital signs, it was student nurses that they ask us to go and do.”* (HCP,  
49 North-FGD 10)  
50  
51  
52

### 53 **Breaches of confidentiality**

54 The final manifestations of stigma that were reported to occur in healthcare settings was  
55 breaches of confidentiality. Participants reported that some HCPs indeed fail to maintain  
56 confidentiality. According to some participants, it is common to receive information about  
57 PWHB from a colleague in the various hospital wards and units.  
58  
59  
60

1  
2  
3  
4  
5  
6  
7  
8  
9  
10  
11  
12  
13  
14  
15  
16  
17  
18  
19  
20  
21  
22  
23  
24  
25  
26  
27  
28  
29  
30  
31  
32  
33  
34  
35  
36  
37  
38  
39  
40  
41  
42  
43  
44  
45  
46  
47  
48  
49  
50  
51  
52  
53  
54  
55  
56  
57  
58  
59  
60

*“The moment they diagnose somebody Hepatitis B positive, even if it is one single nurse who is on duty, the whole hospital will hear. The nurse will circulate the information until that ward nurses finish and everybody is informed. If the person is pregnant, it will even spread to the antenatal unit and then to maternity ward and every nurse become careful with such a person.”* (HCP, North-FGD 28)

## DISCUSSION

This study set out to explore the perspectives of PWHB and HCPs on the beliefs contributing to Hepatitis B stigma in Northern and Southern Ghana and the ways in which Hepatitis B stigma manifests. Our findings show three main beliefs underlie Hepatitis B stigma in Ghana, namely 1) the belief that Hepatitis B is highly contagious; 2) the belief that Hepatitis B is very severe; and c) the belief that Hepatitis B is caused by curses. Our findings also show that Hepatitis B stigmatisation manifests as avoidance and social isolation. In the healthcare setting, excessive cautiousness, task-shifting, procedure avoidance, and breaches of confidentiality were also reported.

The belief that Hepatitis B is highly contagious was reported by both PWHB and HCPs as central to the existence of stigma in Ghana. Contributing to this perceived contagiousness were beliefs that Hepatitis B can be transmitted through casual contact such as handshaking, touching, and the sharing of eating utensils with chronic Hepatitis B infected persons and a focus on body fluids, such as sweat, as a source of infection. Stigmatisation originating from a fear of infection is not particular to Ghana, but has been reported in other locations.<sup>26 33 42 55 56-59</sup> For example, in Parkistan, Rafique and colleagues<sup>33</sup> indicated that PWHB suffered stigmatising reactions from their families who feared infection and thus refused to share eating and drinking utensils, as well as soap and towels with relatives living with chronic Hepatitis B. That sweat was claimed to be an important source of HBV transmission thus leading to avoidance of PWHB has also previously been documented by a study conducted in Nigeria.<sup>60</sup> That sweat is in fact not a vehicle for HBV transmission<sup>61</sup> suggests a knowledge deficit regarding Hepatitis B transmission not only among the general public in Ghana but also among HCPs. This is particularly disconcerting given that HCPs are considered an important source of Hepatitis B information by their patients.<sup>62</sup>

Our study further showed that the belief that Hepatitis B is very severe is also present in Ghana and that this contributes to stigmatisation. Generally, participants perceived Hepatitis B as deadly. This is consistent with a study conducted by Upadhyaya et al.<sup>63</sup> in the United State. In that study Upadhyaya and colleagues assessed the role and attitude of primary care physicians in Hepatitis B diagnosis and treatment. They found that physicians perceived Hepatitis B as very serious.<sup>63</sup> Interestingly, in our study and previous study also conducted in Ghana,<sup>34</sup> Hepatitis B was perceived to be even more severe than HIV. This could be attributable to the fact that Hepatitis B is not optimally managed in Ghana. Unlike in the case of HIV, antiretroviral treatment for Hepatitis B is not readily available and affordable,<sup>16 44</sup> the number of specialised clinics that can monitor and support PWHB is inadequate,<sup>34</sup> and the WHO policy on treatment, management, and support of PWHB in Ghana has not yet been implemented.<sup>64 34</sup>

1  
2  
3 Additionally, with the exception of Hepatitis B testing which is covered by the national health  
4 insurance scheme when requested by physicians, Hepatitis B vaccination is offered at a fee.  
5 The only national policy on Hepatitis B prevention in Ghana is the administration of Hepatitis  
6 B pentavalent vaccine to newborns at the 6, 10, 14 weeks after birth.<sup>34</sup>  
7  
8

9 Another finding of this study was the belief that Hepatitis B is caused by curses. An earlier  
10 study has shown that people attach superstitious beliefs to Hepatitis B in Ghana.<sup>34</sup> Also, a study  
11 conducted by Adjei et al. entitled "Hepatitis B infection among perturient in Peri-Urban  
12 Ghana" found that 86% ( $n=168$ ) of participants linked the cause of Hepatitis B to curses. This  
13 association is unsurprising given that some clinical manifestations of Hepatitis B, including  
14 swollen abdomen and feet, are analogous to the outcomes of a curse in Ghanaian culture. In  
15 Ghana, people are particularly cautious about handling items perceived to be cursed as not  
16 handling them can help to avoid possible transfer of the consequences.  
17  
18  
19

20 In addition to documenting beliefs about Hepatitis B that contribute to stigmatisation, we also  
21 explored manifestations of Hepatitis B stigma. One manifestation was avoidance. This finding  
22 is consistent with other studies.<sup>55 57</sup> For example, in a study conducted in Japan with a sample  
23 of the working population, Eguchi and Wada<sup>55</sup> found that 32.1% of their study participants  
24 avoided physical contact with colleagues after learning their HBV positive status. Similarly, in  
25 an Iranian study, patients with Hepatitis B reported believing that saliva is a source of Hepatitis  
26 B infection and therefore avoiding body contact with close relations including kissing.<sup>59</sup>  
27  
28  
29

30 In our study, we also found that stigma manifests as social isolation. Our finding that students  
31 were isolated from their counterparts in school dormitories because of their Hepatitis B status  
32 is similar to a finding from a study in China where a university student with Hepatitis B was  
33 put in a single room instead of a shared dormitory.<sup>58</sup> In another somewhat earlier study by Yang  
34 and Wu,<sup>65</sup> the findings showed that some universities and kindergartens in China refused to  
35 admit prospective students who were Hepatitis B positive.  
36  
37  
38

39 Our study also looked specifically at Hepatitis B stigma in healthcare settings. The findings  
40 showed that stigmatisation took form as excessive cautiousness, task-shifting and procedure  
41 avoidance, and breaches of confidentiality. Perhaps inadequate knowledge and fear of  
42 acquisition of HBV among the HCPs led to the excessive cautiousness and fear. This has been  
43 previously document by Yu and colleagues<sup>66</sup> in China. Similarly, Wada et al.<sup>38</sup>, in their study  
44 conducted in Japan, reported that some nurses were also reluctant to care for PWHB due to a  
45 perceived risk of infection. In another study conducted in Iran with chronic Hepatitis B patients  
46 by Dehkordi and others<sup>39</sup>, nurses and doctors were reported to be hesitant caring for PWHB  
47 after realising they have Hepatitis B.  
48  
49  
50  
51

52 Our findings have important practical implications. First, the findings provide important insight  
53 on how to go about reducing Hepatitis B stigma. Given the prevalence of incorrect knowledge,  
54 as reflect in the beliefs about Hepatitis B, we recommend public awareness campaigns that  
55 emphasize Hepatitis B transmission routes. Also, given the manifestations of the stigma in the  
56 healthcare settings, we feel that a continuing professional development programme on the  
57 aetiology of Hepatitis B is called as this can enhance HCPs knowledge in parallel to public  
58  
59  
60

1  
2  
3 awareness campaigns. Additionally, we recommend efforts to increase health literacy on  
4 Hepatitis B prevention measures, including vaccination, as this may increase HCPs confidence  
5 when caring for PWHB. If developed based on both theory and evidence and in collaboration  
6 with target populations, these interventions have the potential to effectively reduce Hepatitis B  
7 stigma in Ghana.<sup>67</sup> In addition, PWHB should be counsel on the relevance of using either  
8 problem focused coping strategies such as seeking social support, affiliating with others with  
9 same disease and emotion-focused strategies such as religious coping and positive reappraisal  
10 as a way of building their resilience.<sup>19 68</sup> Stigma reduction intervention such as psycho-  
11 educational intervention which focuses on education, skill building, empowerment, and social  
12 support can be explored in Ghana.<sup>69</sup>  
13  
14  
15  
16

17 The findings of this study should be viewed in light of a few limitations. Although this study  
18 provided insight into the beliefs contributing to Hepatitis B stigma and the manifestations of  
19 stigma in Ghana, we recommend confirming these results quantitatively in a large  
20 representative sample of the Ghanaian population. Second, given that participants, particularly  
21 PWHB had lived with the infection for a period between one and seven years, and were asked  
22 to recall their experiences retrospectively, there was potential for recall bias. We, however,  
23 sought to reduce this by asking follow-up questions to confirm or verify participants'  
24 experiences. The third limitation of this study is the exclusion of PWHB who were in the  
25 terminal stage of the disease. We therefore recognise that their experiences with stigma might  
26 differ from our study participants.  
27  
28  
29  
30

### 31 **Conclusion**

32  
33 This study gives insight about beliefs contributing to Hepatitis B stigma in Ghana and its  
34 manifestations. We found that beliefs that Hepatitis B is highly contagious, very severe, and  
35 caused by a curse are present and contribute to the stigmatisation of PWHB in Ghana. Hepatitis  
36 B stigmatisation manifested as avoidance and social isolation. In the healthcare settings,  
37 excessive cautiousness, task-shifting, procedure avoidance, and breaches of confidentiality  
38 were also found. We therefore recommend interventions that seek to alter the beliefs  
39 contributing to Hepatitis B stigma in Ghana, starting with efforts that correct knowledge  
40 deficits.  
41  
42  
43  
44

45 **Acknowledgement:** We acknowledge the Ghana Education Trust Fund (GETFUND) for  
46 supporting the First author's PhD programme. We appreciate the support of Mr. Gilbert  
47 Nachinab, Miss Suglo, and Miss Adu-Twumwaa during the period of data collection. We  
48 acknowledge the contribution of the study participants.  
49  
50

### 51 **Abbreviation**

52 HBV- Hepatitis B Virus; PWHB- People with Hepatitis B; HCPs – Healthcare Providers; IDI  
53 – In-depth Interviews; FGD – Focus Group Discussions  
54  
55

### 56 **Funding**

57 No funding  
58  
59  
60

**Availability of data and materials:** Participants have consented for anonymised transcripts to be shared upon request.

**Authors Contribution:** CAA conceptualised the study. CAA, SES, RACR, FN designed the study. Interview guide was designed by CAA and SES. Data analysis was done by CAA and SES. Manuscript was critically reviewed by SES, FN, RACR. All authors read and approved the manuscript.

**Competing interests:** The authors declare no conflict of interest in this study.

**Consent for publication:** Not applicable

### Ethical Approval

Ethical clearance was obtained from Institutional Review Board of Korle-Bu Teaching Hospital (Approval number KBTH-IRB 00092/2016). Permission was sought from the management of the data collection sites, and informed consent (written) was obtained from the participants.

### References

1. Schweitzer A, Horn J, Mikolajczyk RT, *et al.* Estimations of worldwide prevalence of chronic hepatitis B virus infection: A systematic review of data published between 1965 and 2013. *Lancet* 2015;386:1546–55. doi:10.1016/S0140-6736(15)61412-X
2. WHO. Hepatitis B Fact Sheet. 2018a. [Retrieved from: <http://www.who.int/mediacentre/factsheets/fs204/en/>. Available on February 06, 2018]
3. Ofori-Asenso R, Agyeman AA. Hepatitis B in Ghana: a systematic review & meta-analysis of prevalence studies (1995-2015). *BMC Infect Dis* 2016;16:130. doi:10.1186/s12879-016-1467-5
4. Musa BM, Bussell S, Borodo MM, *et al.* Prevalence of hepatitis B virus infection in Nigeria, 2000-2013: a systematic review and meta-analysis. *Niger J clin Pr* 2015;18:163–72. doi:10.4103/1119-3077.151035
5. Kolou M, Katawa G, Salou M, *et al.* High Prevalence of Hepatitis B Virus Infection in the Age Range of 20-39 Years Old Individuals in Lome. 2015;:1–7. doi:10.2174/1874357901710011001
6. Bigna JJ, Amougou MA, Asangbeh SL, *et al.* Seroprevalence of hepatitis B virus infection in Cameroon : a systematic review and meta-analysis. 2017;:1–12. doi:10.1136/bmjopen-2016-015298



- 1  
2  
3 7. Rufai T, Mutocheluh M, Kwarteng K, *et al.* The prevalence of hepatitis B virus E  
4 antigen among Ghanaian blood donors. *Pan Afr Med J* 2014;**17**:53.  
5 doi:10.11604/pamj.2014.17.53.3390  
6  
7
- 8  
9 8. Mutocheluh M, Owusu M, Kwofie TB, *et al.* Risk factors associated with hepatitis B  
10 exposure and the reliability of five rapid kits commonly used for screening blood donors  
11 in Ghana. *BMC Res Notes* 2014;**7**:1–8. doi:10.1186/1756-0500-7-8739.  
12
- 13  
14 9. Sagoe KWC, Agyei AA, Ziga F, Lartey M, Adiku TK, Seshi M, Arens MQ, Mingle J  
15 A A. Prevalence and Impact of Hepatitis B and C Virus Co-Infections in Antiretroviral  
16 Treatment Naive Patients with HIV Infection at a Major Treatment Center in Ghana.  
17 *Journal of Medical Virology* 2012; **84**: 6-10  
18
- 19  
20 10. Adjei AA, Armah HB, Gbagbo F, *et al.* Correlates of HIV, HBV, HCV and syphilis  
21 infections among prison inmates and officers in Ghana: A national multicenter study.  
22 *BMC Infect Dis* 2008;**8**:1–12. doi:10.1186/1471-2334-8-33  
23
- 24  
25 11. Candotti D, Danso K, Allain J-P. Maternofetal transmission of hepatitis B virus  
26 genotype E in Ghana, west Africa. *J Gen Virol* 2007;**88**:2686–95.  
27 doi:10.1099/vir.0.83102-0  
28
- 29  
30 12. Cho Y, Bonsu G, Akoto-Ampaw A, *et al.* The prevalence and risk factors for  
31 hepatitis B surface Ag positivity in pregnant women in eastern region of Ghana. *Gut*  
32 *Liver* 2012;**6**:235–40. doi:10.5009/gnl.2012.6.2.235  
33
- 34  
35 13. Trépo C, Chan HLY, Lok A. Hepatitis B virus infection. *Lancet* 2014;**6736**:1–11.  
36 doi:10.1016/S0140-6736(14)60220-8  
37
- 38  
39 14. Giles-Vernick T, Hejoaka F, Sanou A, Shimakawa Y, Bamba I, Traoré A. Barriers to  
40 Linkage to Care for Hepatitis B Virus Infection: A Qualitative Analysis in Burkina  
41 Faso, West Africa. *Am J Trop Med Hyg* 2016;**95**:1368–75. doi:10.4269/ajtmh.16-  
42 0398  
43
- 44  
45 15. Lemoine M, Eholié S, Lacombe K. Reducing the neglected burden of viral hepatitis  
46 in Africa: Strategies for a global approach. *J Hepatol* 2015;**62**:469–76.  
47 doi:10.1016/j.jhep.2014.10.008  
48
- 49  
50 16. Nwokediuko SC. Chronic Hepatitis B : Management Challenges in Resource-Poor  
51 Coun- tries. 2011;**11**:786–93. doi:10.5812/kowsar.1735143X.757  
52
- 53  
54 17. Butt G, Paterson BL, McGuinness LK. Living with the stigma of hepatitis C. *West J*  
55 *Nurs Res* 2008;**30**:204–21. doi:10.1177/0193945907302771  
56
- 57  
58 18. Sandelowski, M., Lambe, C., & Barroso, J. (2004). Stigma in HIV-Positive Women.  
59 *J Nurs Scholarsh.*, 2004;**36** (2):122-8  
60

19. Stutterheim SE, Bos AER, Shiripinda I, *et al.* HIV-related stigma in African and Afro-Caribbean communities in the Netherlands : Manifestations , consequences , and coping. *Psychol Health* 2012;**27**:1–32. doi:10.1080/08870446.2011.585426
20. Colombini M, Mutemwa R, Kivunaga J, *et al.* Experiences of stigma among women living with HIV attending sexual and reproductive health services in Kenya : a qualitative study. 2014:1–9.
21. Courtwright A, Turner NA. Tuberculosis and Stigmatization :Pathways and Interventions. *Public Health Reports* 2010;**125**:34–42.
22. Miller C, Huston J, Samu L, *et al.* ‘ It makes the patient’s spirit weaker’: tuberculosis stigma and gender interaction in Dar es Salaam , Tanzania. 2017;**21**:42–9.
23. Cotler SJ, Cotler S, Xie H, *et al.* Characterizing hepatitis B stigma in Chinese immigrants. *J Viral Hepat* 2012;**19**:147–52. doi:10.1111/j.1365-2893.2011.01462.x
24. Ellard, J. & Wallace J. (2013). Stigma and discrimination and hepatitis B: A review of current research. *ARCSHS Monographs Series*, 93
25. Ng CJ, Low WY, Wong LP, *et al.* Uncovering the experiences and needs of patients with chronic hepatitis B infection at diagnosis: a qualitative study. *Asia Pac J Public Health* 2013;**25**:32–40. doi:10.1177/1010539511413258
26. Wu H, Yim C, Chan A, *et al.* Sociocultural factors that potentially affect the institution of prevention and treatment strategies for hepatitis B in Chinese Canadians. *Can J Gastroenterol* 2009;**23**:31–6.
27. Alizadeh a HM, Ranjbar M, Yadollahzadeh M. Patient concerns regarding chronic hepatitis B and C infection. 2008;**14**:1142–8.
28. Guirgis M, Nusair F, Bu YM, *et al.* Barriers faced by migrants in accessing healthcare for viral hepatitis infection. *Intern Med J* 2012;**42**:491–6. doi:10.1111/j.1445-5994.2011.02647.x
29. WHO. “My untold story”- a hepatitis B patient in Ghana shares his experience. 2018b. [Retrieved from: [http://www.who.int/hepatitis/news-events/ghana-pr-an\\_untold\\_story/en/](http://www.who.int/hepatitis/news-events/ghana-pr-an_untold_story/en/). Available on February 20, 2018]
30. Goffman, E. (1963). Stigma: notes on the management of social spoiled identity. Eaglewood Cliffs, NJ@ Prentice-Hall.



- 1  
2  
3 31. Link B, Phelan J. Stigma power. *Soc. Sci. Med.* 2014; 103: 24-  
4 doi:10.1016/j.socscimed.2013.07.035  
5  
6  
7 32. Li D, Tang T, Patterson M, *et al.* The impact of hepatitis B knowledge and stigma on  
8 screening in Canadian Chinese persons. 2012;**26**:597–602.  
9  
10  
11 33. Rafique I, Saqib MAN, Siddiqui S, *et al.* Experiences of stigma among hepatitis B and  
12 C patients in Rawalpindi and Islamabad, Pakistan/Expériences de stigmatisation chez  
13 des patients atteints d'hépatite B et C à Rawalpindi et Islamabad (Pakistan). *East*  
14 *Mediterr Heal J* 2014;**20**:796.  
15  
16  
17 34. Adjei CA, Naab F, Donkor ES. Beyond the diagnosis: a qualitative exploration of the  
18 experiences of persons with hepatitis B in the Accra Metropolis, Ghana. *BMJ Open*  
19 2017;**7**:e017665. doi:10.1136/bmjopen-2017-017665  
20  
21  
22 35. Yoo GJ, Fang T, Zola J, *et al.* Destigmatizing hepatitis B in the Asian American  
23 community: Lessons learned from the San Francisco Hep B free campaign. *J Cancer*  
24 *Educ* 2012;**27**:138–44. doi:10.1007/s13187-011-0252-9  
25  
26  
27 36. Huang J, Guan ML, Balch J, *et al.* Survey of hepatitis B knowledge and stigma  
28 among chronically infected patients and uninfected persons in Beijing, China. *Liver*  
29 *Int* 2016;**36**:1595–603. doi:10.1111/liv.13168  
30  
31  
32 37. Carabez RM, Swanner JA, Yoo GJ, *et al.* Knowledge and fears among Asian  
33 Americans chronically infected with hepatitis B. *J Cancer Educ* 2014;**29**:522–8.  
34 doi:10.1007/s13187-013-0585-7  
35  
36  
37 38. Wada K, Smith DR, Ishimaru T. Reluctance to care for patients with HIV or  
38 hepatitis B / C in Japan. *BMC Pregnancy Childbirth* 2016;**16**:1–6.  
39 doi:10.1186/s12884-016-0822-2  
40  
41  
42 39. Dehkordi AH, Mohammadi N, NikbakhatNasrabadi A. Hepatitis-related stigma in  
43 chronic patients: A qualitative study. *Appl Nurs Res* 2016;**29**:206–10.  
44 doi:10.1016/j.apnr.2015.04.010  
45  
46  
47 40. Lee H, Fawcett J, Yang JH, *et al.* Correlates of Hepatitis B Virus Health-Related  
48 Behaviors of Korean Americans : A Situation-Specific Nursing Theory. 2012;:315–22.  
49 doi:10.1111/j.1547-5069.2012.01468.x  
50  
51  
52 41. Shi J, Chyun D a., Sun Z, *et al.* Assessing the stigma toward chronic carriers of  
53 hepatitis B virus: development and validation of a Chinese college students' stigma  
54 scale. *J Appl Soc Psychol* 2013;**43**:E46–55. doi:10.1111/jasp.12040  
55  
56  
57 42. Mohamed R, Ng CJ, Tong WT, *et al.* Knowledge, attitudes and practices among  
58 people with chronic hepatitis B attending a hepatology clinic in Malaysia: a cross  
59 sectional study. *BMC Public Health* 2012;**12**:601. doi:10.1186/1471-2458-12-601  
60  
61 43. Wallace J, McNally S, Richmond J, *et al.* Managing chronic hepatitis B: A

- 1  
2  
3 qualitative study exploring the perspectives of people living with chronic hepatitis B in  
4 Australia. *BMC Res Notes* 2011;**4**:45. doi:10.1186/1756-0500-4-45  
5  
6  
7  
8 44. Spearman CW, Afihene M, Ally R, *et al.* Hepatitis B in sub-Saharan Africa:  
9 strategies to achieve the 2030 elimination targets. *Lancet Gastroenterol Hepatol*  
10 2017;**2**:2121. doi:10.1016/S2468-1253(17)30295-9  
11  
12  
13 45. Labaree RV. Organising your Social sciences Research Paper: Types of  
14 Research designs. 2009.[Retrieved from:  
15 <http://libguides.usc.edu/writingguide/researchdesigns>. Available on January 25, 2018]  
16  
17  
18 46. Ghana Statistical Service. Ghana Health Service (GHS), and ICF Macro.  
19 Ghana Demographic and Health Survey 2008, Calverton, Maryland, USA: GSS, GHS,  
20 and Macro International. 2009  
21  
22 47. Ghana Statistical Service. 2010 population projected by sex, 2010-2016. 2016.  
23 Retrieved from: [http://www.statsghana.gov.gh/pop\\_stats.html](http://www.statsghana.gov.gh/pop_stats.html), Accessed on May 24,  
24 2018]  
25  
26  
27 48. Ministry of Health. Category: Ministry agencies. 2018. [Retrieved from:  
28 <http://www.moh.gov.gh/category/ministry-agencies/>, Accessed on January 01, 2017]  
29  
30  
31 49. Carter N, Bryant-Lukosius D, DiCenso A, *et al.* The Use of Triangulation in  
32 Qualitative Research. *Oncol Nurs Forum* 2014;**41**:545–7. doi:10.1188/14.ONF.545-  
33 547  
34  
35  
36 50. Etikan I, Musa SA, Alkassim RS. Comparison of Convenience Sampling and  
37 Purposive Sampling. 2016;**5**:1–4. doi:10.11648/j.ajtas.20160501.1  
38  
39  
40 51. Palinkas L a, Horwitz SM, Green C a, *et al.* Purposeful Sampling for Qualitative  
41 Data Collection and Analysis in Mixed Method Implementation Research. *Adm Policy*  
42 *Ment Heal* 2015;**42**:533–44. doi:10.1007/s10488-013-0528-y.Purposeful  
43  
44  
45 52. Wellings K, Branigan P, Mitchell K. Discomfort, discord and discontinuity as data:  
46 Using focus groups to research sensitive topics. *Cult Heal Sex* 2000;**2**:255–67.  
47 doi:10.1080/136910500422241  
48  
49  
50 53. Polit DF, Beck CT. Nursing research: Principles and methods (8<sup>TH</sup>  
51 Edition). 2014. Lippincot William & Wilkins.  
52  
53  
54 54. Valizadeh L, Zamanzadeh V, Bayani M, Zabihi A. The Social Stigma Experience in  
55 Patients With Hepatitis B Infection. *Gastroenterol Nurs* [Internet]. 2017;**40**(2):143–50.  
56 Available from: <http://insights.ovid.com/crossref?an=00001610-201703000-00009>  
57  
58  
59 55. Vaismoradi M, Turunen H, Bondas T. Content analysis and thematic analysis:  
60 Implications for conducting a qualitative descriptive study. *Nurs Heal Sci*.  
2013;**15**(3):398–405.

- 1  
2  
3  
4  
5  
6  
7  
8  
9  
10  
11  
12  
13  
14  
15  
16  
17  
18  
19  
20  
21  
22  
23  
24  
25  
26  
27  
28  
29  
30  
31  
32  
33  
34  
35  
36  
37  
38  
39  
40  
41  
42  
43  
44  
45  
46  
47  
48  
49  
50  
51  
52  
53  
54  
55  
56  
57  
58  
59  
60
56. Eguchi H, Wada K. Knowledge of HBV and HCV and Individuals' Attitudes Toward HBV- and HCV-Infected Colleagues: A National Cross-Sectional Study among a Working Population in Japan. *PLoS One* 2013;**8**:1–7. doi:10.1371/journal.pone.0076921
  57. Dahl TFM, Cowie BC, Biggs B, *et al.* Health literacy in patients with chronic hepatitis B attending a tertiary hospital in Melbourne : a questionnaire based survey. 2014;:1–9.
  58. Dam L, Cheng A, Tran P, *et al.* Hepatitis B stigma and knowledge among Vietnamese in Ho Chi Minh City and Chicago. *Can J Gastroenterol Hepatol* 2016;**2016**. doi:10.1155/2016/1910292
  59. Kan Q, Wen J, Xue R. Discrimination against people with hepatitis B in China. *Lancet* 2015;**386**:245–6. doi:10.1016/S0140-6736(15)61276-4
  60. Ochu CL, Beynon CM. Hepatitis B vaccination coverage, knowledge and sociodemographic determinants of uptake in high risk public safety workers in Kaduna State, Nigeria: A cross sectional survey. *BMJ Open* 2017;**7**:1–10. doi:10.1136/bmjopen-2017-015845
  61. Schillie S, Vellozzi C, Reingold A, Harris A, Haber P, Ward JW, Nelson NP. Prevention of hepatitis B virus infection in the United States: Recommendations of the Advisory Committee on Immunisation Practices. MMWR Report. 2018. [Retrieved from <https://www.cdc.gov/mmwr/volumes/67/rr/rr6701a1.htm>. Available on February 20, 2018]
  62. Hajarizadeh B, Wallace J, Richmond J, *et al.* Hepatitis B knowledge and associated factors among people with chronic hepatitis B. *Aust N Z J Public Health* 2015;**39**:563–8. doi:10.1111/1753-6405.12378
  63. Upadhyaya N, Chang R, Davis C, *et al.* Chronic hepatitis B: Perceptions in Asian American communities and diagnosis and management practices among primary care physicians. *Postgrad Med* 2010;**122**:165–75. doi:10.3810/pgm.2010.09.2213
  64. WHO. Guidelines for the prevention, care and treatment of persons with chronic hepatitis B infection. 2015;:166.
  65. Yang T, Wu MC. Discrimination against hepatitis B carriers in China. *Lancet* 2011;**378**:1059. doi:10.1016/S0140-6736(11)61460-8
  66. Yu L, Wang J, Zhu D, *et al.* Hepatitis B-related knowledge and vaccination in association with discrimination against hepatitis B in rural China. *Hum Vaccines Immunother* 2016;**12**:70–6. doi:10.1080/21645515.2015.1069932
  67. Eldredge LKB, Markham CM, Ruiters RAC, Fernández MA, Kok G,

Parcel GS. *Planning Health Promotion Programmes: An Intervention Mapping Approach (4<sup>th</sup> Edition)*. 2016. Jossey-Bass

68. Setlhare V, Wright A, Couper I. The experiences of people living with HIV/AIDS in Gaborone, Botswana: stigma, its consequences and coping mechanisms. *South African Fam Pract* [Internet]. 2014;56(6):309–13. Available from: <http://www.tandfonline.com/doi/abs/10.1080/20786190.2014.975484>

69. Ma PHX, Chan ZCY, Loke AY. Self-Stigma Reduction Interventions for People Living with HIV/AIDS and Their Families: A Systematic Review [Internet]. *AIDS and Behavior*. Springer US; 2018. Available from: <https://doi.org/10.1007/s10461-018-2304-1>

**Table 1: Summary of themes and sub-themes**

| Themes                       | Sub-themes                            |
|------------------------------|---------------------------------------|
| Beliefs About Hepatitis B    | Hepatitis B as highly contagious      |
|                              | Hepatitis B as very severe            |
|                              | Hepatitis B as a curse                |
| Manifestations of HBV Stigma | Avoidance                             |
|                              | Social isolation                      |
|                              | Excessive cautiousness by HCPs        |
|                              | Task-shifting and procedure avoidance |
|                              | Breaches of confidentiality           |

**Table 2: Socio-Demographic Data of Participants with Chronic Hepatitis B**

| <b>Pseudonyms</b> | <b>Occupation</b> | <b>Year of Diagnosis</b> | <b>How participants were diagnosed</b> |
|-------------------|-------------------|--------------------------|----------------------------------------|
| PWHB 1            | Nursing           | 2014                     | Self- initiated                        |
| PWHB 2            | Teacher           | 2011                     | Hospital protocol for pregnant women   |
| PWHB 3            | Caterer           | 2013                     | Hospital protocol for pregnant women   |
| PWHB 4            | Student           | 2016                     | Physician initiated                    |
| PWHB 5            | Sales Manager     | 2016                     | Hospital protocol for pregnant women   |
| PWHB 6            | Trader            | 2012                     | Hospital protocol for pregnant women   |
| PWHB 7            | Unemployed        | 2015                     | Self-initiated                         |
| PWHB 8            | Trader            | 2012                     | Outreach screening programme           |
| PWHB 9            | Unemployed        | 2016                     | Outreach screening programme           |
| PWHB 10           | Banker            | 2008                     | Outreach programme                     |
| PWHB 11           | Unemployed        | 2010                     | Outreach programme                     |
| PWHB 12           | Teacher           | 2015                     | Self-initiated                         |
| PWHB 13           | Unemployed        | 2011                     | Hospital protocol for pregnant women   |
| PWHB 14           | Housewife         | 2014                     | Outreach programme                     |
| PWHB 15           | Trader            | 2009                     | Self-initiated                         |

|         |            |      |                                      |
|---------|------------|------|--------------------------------------|
| PWHB 16 | Teacher    | 2010 | Self-initiated                       |
| PWHB 17 | Trader     | 2013 | Hospital protocol for pregnant women |
| PWHB 18 | Accountant | 2015 | Self-initiated                       |

**Table 3: Socio-Demographic Data of Healthcare Providers**

| Pseudonyms | Occupation | Year of practice |
|------------|------------|------------------|
| HCP 1      | Physician  | 4                |
| HCP 2      | Nurse      | 7                |
| HCP 3      | Nurse      | 9                |
| HCP 4      | Physicians | 3                |
| HCP 5      | Nurse      | 2                |
| HCP 6      | Nurse      | 4                |
| HCP 7      | Physicians | 5                |
| HCP 8      | Nurse      | 5                |
| HCP 9      | Physician  | 3                |
| HCP 10     | Nurse      | 9                |
| HCP 11     | Nurse      | 3                |
| HCP 12     | Physician  | 14               |
| HCP 13     | Physician  | 4                |
| HCP 14     | Physician  | 4                |
| HCP 15     | Physician  | 9                |
| FGD 1      | Nurse      | 10               |
| FGD 2      | Nurse      | 3                |
| FGD 3      | Nurse      | 5                |
| FGD 4      | Nurse      | 9                |
| FGD 5      | Nurse      | 11               |

|        |         |    |
|--------|---------|----|
| FGD 6  | Nurse   | 3  |
| FGD 7  | Nurse   | 4  |
| FGD 8  | Nurse   | 20 |
| FGD 9  | Nurse   | 9  |
| FGD 10 | Nurse   | 3  |
| FGD 11 | Nurse   | 11 |
| FGD 13 | Midwife | 8  |
| FGD 14 | Nurse   | 4  |
| FGD 15 | Midwife | 9  |
| FGD 16 | Nurse   | 4  |
| FGD 17 | Nurse   | 7  |
| FGD 18 | Nurse   | 2  |
| FGD 19 | Nurse   | 7  |
| FGD 20 | Nurse   | 4  |
| FGD 21 | Nurse   | 2  |
| FGD 22 | Midwife | 7  |
| FGD 23 | Nurse   | 8  |
| FGD 24 | Nurse   | 20 |
| FGD 25 | Nurse   | 5  |
| FGD 26 | Nurse   | 3  |
| FGD 27 | Midwife | 11 |
| FGD 28 | Nurse   | 8  |
| FGD 29 | Nurse   | 1  |
| FGD 30 | Midwife | 14 |
| FGD 31 | Nurse   | 4  |
| FGD 32 | Nurse   | 3  |



1  
2  
3  
4  
5  
6  
7  
8  
9  
10  
11  
12  
13  
14  
15  
16  
17  
18  
19  
20  
21  
22  
23  
24  
25  
26  
27  
28  
29  
30  
31  
32  
33  
34  
35  
36  
37  
38  
39  
40  
41  
42  
43  
44  
45  
46  
47  
48  
49  
50  
51  
52  
53  
54  
55  
56  
57  
58  
59  
60

For peer review only

## Supplementary material 1: Interview Guide

### PROTOCOL 1: HEPATITIS B RELATED STIGMA AND COPING INTERVIEW WITH PEOPLE WITH HEPATITIS B

#### 1. Introduction

- Welcome the interviewee and appreciate their time for the session.
- Explain what the study is about.
- Explain what the interview involves including the specific topics to be discussed.
- Inform the interviewee about confidentiality.
- Tell the interviewee that the discussion will be recorded and explain the rationale.
- Discuss voluntary participation- emphasize on their right to stop at any time without consequences.
- Give interviewee opportunity to ask questions including concerns.
- Signing of informed consent form by participant.
- Switch on audio-recorder.

#### 2. Background Information

- ✓ Age
- ✓ Gender
- ✓ Marital Status
- ✓ Occupation
- ✓ Year first diagnosed with HBV infection
- ✓ How participant got tested (self-request, general screening exercise, recommendation by physician, employment requirement, pre-marital requirement etc.)

#### 3. Experience of Stigma and Its Manifestations

- a. Have you been treated differently because you have hepatitis B?
- b. If yes, can you share with me about a situation in which you were treated differently (stigma), or discriminated against because of your HBV positive status? Probe
- c. Where were you treated differently? **Probe**
- d. How often have you experienced this including negative reaction?
- e. What do you think causes people to treat you differently? **Probe**
- f. What do you think society perceive people with hepatitis B as? **Probe**
- g. How did these experiences affect you? **Probe**

### PROTOCOL 2: INTERVIEW OF HEALTHCARE PROVIDERS

1. Have you attended to someone with hepatitis B infection before?
2. If yes, can you share your experience/reaction with me? **Probe**
3. What do society perceive hepatitis B as? **Probe**

1  
2  
3 4. What do people perceive individuals with hepatitis B infection as? **Probe**  
4  
5  
6  
7  
8  
9  
10  
11  
12  
13  
14  
15  
16  
17  
18  
19  
20  
21  
22  
23  
24  
25  
26  
27  
28  
29  
30  
31  
32  
33  
34  
35  
36  
37  
38  
39  
40  
41  
42  
43  
44  
45  
46  
47  
48  
49  
50  
51  
52  
53  
54  
55  
56  
57  
58  
59  
60

For peer review only

## COREQ (CONsolidated criteria for REporting Qualitative research) Checklist

A checklist of items that should be included in reports of qualitative research. You must report the page number in your manuscript where you consider each of the items listed in this checklist. If you have not included this information, either revise your manuscript accordingly before submitting or note N/A.

| Topic                                          | Item No. | Guide Questions/Description                                                                                                                              | Reported on Page No. |
|------------------------------------------------|----------|----------------------------------------------------------------------------------------------------------------------------------------------------------|----------------------|
| <b>Domain 1: Research team and reflexivity</b> |          |                                                                                                                                                          |                      |
| <i>Personal characteristics</i>                |          |                                                                                                                                                          |                      |
| Interviewer/facilitator                        | 1        | Which author/s conducted the interview or focus group?                                                                                                   |                      |
| Credentials                                    | 2        | What were the researcher's credentials? E.g. PhD, MD                                                                                                     |                      |
| Occupation                                     | 3        | What was their occupation at the time of the study?                                                                                                      |                      |
| Gender                                         | 4        | Was the researcher male or female?                                                                                                                       |                      |
| Experience and training                        | 5        | What experience or training did the researcher have?                                                                                                     |                      |
| <i>Relationship with participants</i>          |          |                                                                                                                                                          |                      |
| Relationship established                       | 6        | Was a relationship established prior to study commencement?                                                                                              |                      |
| Participant knowledge of the interviewer       | 7        | What did the participants know about the researcher? e.g. personal goals, reasons for doing the research                                                 |                      |
| Interviewer characteristics                    | 8        | What characteristics were reported about the interviewer/facilitator? e.g. Bias, assumptions, reasons and interests in the research topic                |                      |
| <b>Domain 2: Study design</b>                  |          |                                                                                                                                                          |                      |
| <i>Theoretical framework</i>                   |          |                                                                                                                                                          |                      |
| Methodological orientation and Theory          | 9        | What methodological orientation was stated to underpin the study? e.g. grounded theory, discourse analysis, ethnography, phenomenology, content analysis |                      |
| <i>Participant selection</i>                   |          |                                                                                                                                                          |                      |
| Sampling                                       | 10       | How were participants selected? e.g. purposive, convenience, consecutive, snowball                                                                       |                      |
| Method of approach                             | 11       | How were participants approached? e.g. face-to-face, telephone, mail, email                                                                              |                      |
| Sample size                                    | 12       | How many participants were in the study?                                                                                                                 |                      |
| Non-participation                              | 13       | How many people refused to participate or dropped out? Reasons?                                                                                          |                      |
| <i>Setting</i>                                 |          |                                                                                                                                                          |                      |
| Setting of data collection                     | 14       | Where was the data collected? e.g. home, clinic, workplace                                                                                               |                      |
| Presence of non-participants                   | 15       | Was anyone else present besides the participants and researchers?                                                                                        |                      |
| Description of sample                          | 16       | What are the important characteristics of the sample? e.g. demographic data, date                                                                        |                      |
| <i>Data collection</i>                         |          |                                                                                                                                                          |                      |
| Interview guide                                | 17       | Were questions, prompts, guides provided by the authors? Was it pilot tested?                                                                            |                      |
| Repeat interviews                              | 18       | Were repeat interviews carried out? If yes, how many?                                                                                                    |                      |
| Audio/visual recording                         | 19       | Did the research use audio or visual recording to collect the data?                                                                                      |                      |
| Field notes                                    | 20       | Were field notes made during and/or after the interview or focus group?                                                                                  |                      |
| Duration                                       | 21       | What was the duration of the interviews or focus group?                                                                                                  |                      |
| Data saturation                                | 22       | Was data saturation discussed?                                                                                                                           |                      |
| Transcripts returned                           | 23       | Were transcripts returned to participants for comment and/or                                                                                             |                      |

| Topic                                  | Item No. | Guide Questions/Description                                                                                                        | Reported on Page No. |
|----------------------------------------|----------|------------------------------------------------------------------------------------------------------------------------------------|----------------------|
|                                        |          | correction?                                                                                                                        |                      |
| <b>Domain 3: analysis and findings</b> |          |                                                                                                                                    |                      |
| <i>Data analysis</i>                   |          |                                                                                                                                    |                      |
| Number of data coders                  | 24       | How many data coders coded the data?                                                                                               |                      |
| Description of the coding tree         | 25       | Did authors provide a description of the coding tree?                                                                              |                      |
| Derivation of themes                   | 26       | Were themes identified in advance or derived from the data?                                                                        |                      |
| Software                               | 27       | What software, if applicable, was used to manage the data?                                                                         |                      |
| Participant checking                   | 28       | Did participants provide feedback on the findings?                                                                                 |                      |
| <i>Reporting</i>                       |          |                                                                                                                                    |                      |
| Quotations presented                   | 29       | Were participant quotations presented to illustrate the themes/findings?<br>Was each quotation identified? e.g. participant number |                      |
| Data and findings consistent           | 30       | Was there consistency between the data presented and the findings?                                                                 |                      |
| Clarity of major themes                | 31       | Were major themes clearly presented in the findings?                                                                               |                      |
| Clarity of minor themes                | 32       | Is there a description of diverse cases or discussion of minor themes?                                                             |                      |

Developed from: Tong A, Sainsbury P, Craig J. Consolidated criteria for reporting qualitative research (COREQ): a 32-item checklist for interviews and focus groups. *International Journal for Quality in Health Care*. 2007. Volume 19, Number 6: pp. 349 – 357

**Once you have completed this checklist, please save a copy and upload it as part of your submission. DO NOT include this checklist as part of the main manuscript document. It must be uploaded as a separate file.**

# BMJ Open

## Chronic Hepatitis B stigma in Ghana: a qualitative study with patients and providers

|                                 |                                                                                                                                                                                                                                                                                      |
|---------------------------------|--------------------------------------------------------------------------------------------------------------------------------------------------------------------------------------------------------------------------------------------------------------------------------------|
| Journal:                        | <i>BMJ Open</i>                                                                                                                                                                                                                                                                      |
| Manuscript ID                   | bmjopen-2018-025503.R2                                                                                                                                                                                                                                                               |
| Article Type:                   | Research                                                                                                                                                                                                                                                                             |
| Date Submitted by the Author:   | 12-Mar-2019                                                                                                                                                                                                                                                                          |
| Complete List of Authors:       | Adjei, Charles; University of Ghana, Community Health Nursing Department<br>Stutterheim, Sarah; Maastricht University, Department of Work and Social Psychology<br>Naab, Florence; University of Ghana, Department of Maternal and Child Health<br>Ruiter, R; Maastricht University, |
| <b>Primary Subject Heading</b>: | Gastroenterology and hepatology                                                                                                                                                                                                                                                      |
| Secondary Subject Heading:      | Gastroenterology and hepatology, Infectious diseases, Public health                                                                                                                                                                                                                  |
| Keywords:                       | Hepatitis B, Ghana, Qualitative study, Belief, Stigma                                                                                                                                                                                                                                |
|                                 |                                                                                                                                                                                                                                                                                      |

SCHOLARONE™  
Manuscripts



## Chronic Hepatitis B stigma in Ghana: a qualitative study with patients and providers

Charles Ampong Adjei - **Corresponding Author**

(PhD student, Maastricht University, The Netherlands)

Department of Community Health Nursing

School of Nursing and Midwifery

College of Health Sciences

University of Ghana

chadjei@ug.edu.gh

Dr. Sarah E. Stutterheim

Department of Work and Social Psychology

Maastricht University, The Netherlands

Email: s.stutterheim@maastrichtuniversity.nl

Dr. Florence Naab

Department of Maternal and Child Health

School of Nursing and Midwifery

College of health Sciences

University of Ghana

+23324522332

fnaab@ug.edu.gh

Prof. Dr. Robert A.C. Ruiter

Department of Work and Social Psychology

Maastricht University, The Netherlands

Email: r.ruiter@maastrichtuniversity.nl

### ABSTRACT

**Objective:** This study explored beliefs contributing to Hepatitis B stigma, and the ways in which Hepatitis B stigma manifests, from the perspectives of people with chronic Hepatitis B as well as healthcare providers in Northern and Southern Ghana.

**Design:** We used an exploratory qualitative design with a purposive sampling technique. Face-to-face interviews and focus group discussions were conducted. Data were processed using QSR Nvivo version 10.0 and analysed using inductive thematic analysis.

**Settings:** Participants were recruited from one tertiary and one regional hospital in Ghana between February and November, 2017.

**Participants:** Overall, 18 people with chronic Hepatitis B and 47 healthcare providers (primary care physicians, nurses, and midwives) between the ages of 21 and 57 years participated in the study.

**Results:** People with chronic Hepatitis B face stigma in their socio-cultural context and the healthcare environment. Three main beliefs underlying stigma were found: (1) the belief that Hepatitis B is highly contagious; (2) the belief that Hepatitis B is very severe; and (3) the belief

1  
2  
3 that Hepatitis B is caused by curses. Stigmatisation manifested as avoidance and social  
4 isolation (discrimination). In healthcare settings, stigmatisation manifested as excessive  
5 cautiousness, procedure postponement or avoidance, task-shifting, and breaches of  
6 confidentiality.  
7  
8

9 **Conclusions:** Given the prevalence of incorrect knowledge, as reflected in the beliefs about  
10 Hepatitis B, we recommend public awareness campaigns that emphasise Hepatitis B  
11 transmission routes. Also, given the manifestations of the stigma in healthcare settings, we  
12 recommend the development and implementation of a continuing professional development  
13 programme on Hepatitis B and adjusted policy on Hepatitis B vaccination for HCPs.  
14  
15

16 **Key words:** Hepatitis B, Ghana, stigma, beliefs.  
17  
18

### 19 **Strengths and limitations of this study**

- 20 ➤ This study is the first to document Hepatitis B stigma in Ghana.
- 21
- 22 ➤ Triangulation of the data across settings as well as the inclusion of people with  
23 chronic Hepatitis B (PWHB) and healthcare providers (primary physicians, nurses,  
24 and midwives) assisted in understanding and describing the phenomenon, and further  
25 ensured the trustworthiness of the findings.  
26
- 27 ➤ Although this study provided insight into the beliefs contributing to Hepatitis B  
28 stigma and the manifestations of stigma in Ghana, we recommend confirming these  
29 results quantitatively in a large representative sample of the Ghanaian population.  
30
- 31 ➤ We recognise the possibility of recall bias since the PWHB had lived with the disease  
32 for a period between 1 and 7 years.  
33  
34  
35  
36  
37  
38

## 39 **INTRODUCTION**

40 Hepatitis B viral (HBV) infection remains a public health challenge affecting approximately  
41 248 million people worldwide.<sup>1</sup> Globally, about 887,000 deaths attributable to complications  
42 of Hepatitis B (i.e. hepatocellular carcinoma and cirrhosis) were recorded in 2015.<sup>2</sup> Sub-  
43 Saharan Africa is disproportionately affected<sup>2</sup> as evidenced by the high HBV prevalence in  
44 the region.<sup>3-6</sup>  
45  
46  
47

48 Within the Ghanaian context, several studies have estimated Hepatitis B prevalence above 8%.<sup>3</sup>  
49 <sup>7-12</sup> In fact, the most recent prevalence estimate of Hepatitis B in Ghana is 12.3%.<sup>3</sup> HBV  
50 transmission occurs through several means.<sup>1 13</sup> In high endemic countries such as Ghana,  
51 Hepatitis B is predominantly transmitted perinatally.<sup>13</sup> Other practices, including but not  
52 limited to, unsafe injections, blood transfusions, dialysis, needle stick injuries, intimate sexual  
53 contact, and non-sexual contact are postulated as a vehicle for HBV transmission.<sup>13</sup> Perhaps,  
54 challenges such as the high cost of testing and treatment, poor referral systems, a lack of HBV  
55 management guidelines, and inadequate infrastructure for screening contribute to the high  
56 prevalence of Hepatitis B in developing countries, including Ghana.<sup>14-16</sup>  
57  
58  
59  
60

1  
2  
3  
4  
5 Generally, conditions with some risk of transmission are associated with stigma.<sup>17 18</sup> This is  
6 well reported for conditions such as Tuberculosis and HIV.<sup>19-22</sup> Similarly, people with chronic  
7 Hepatitis B (PWHB) are likely to be stigmatised.<sup>23-29</sup> Goffman,<sup>30</sup> in his seminal work, described  
8 stigmatisation as a socially and culturally constituted process whereby a person is first labelled  
9 as different and then devalued, leading to status loss and discrimination. Link and Phelan<sup>31</sup> also  
10 outlined three main motivations for stigmatisation namely exploitation and domination  
11 (keeping people down), enforcement of social norms (keeping people in), and avoidance of  
12 diseases (keeping people away). Exploitation and domination occur when a group dominate or  
13 exploit another by virtue of their wealth, power, and high social status. Enforcement of social  
14 norms centres on written and unwritten rules that people are expected to follow and those who  
15 violate these norms are stigmatized.<sup>31</sup> Because Hepatitis B is an infectious disease, the third  
16 motivation for stigmatisation, disease avoidance, is most likely. This is supported by evidence  
17 from Canada and Pakistan showing that PWHB experience stigma because of the perceived  
18 infectiousness of HBV.<sup>32-33</sup> However, research also supports the contention that stigmatisation  
19 of PWHB may be motivated by a desire to enforce social norms as Hepatitis B has been  
20 reported to be considered the consequence of promiscuous behaviour.<sup>29 34 35</sup> Further, given that  
21 HBV can be transmitted through intimate sexual contact, the enforcement of social norms as a  
22 motivation for stigmatization could be particularly relevant in Ghana, where the majority of  
23 the population are Christians and Muslims who disapprove of pre-marital sex.<sup>34</sup> In addition, a  
24 lack of knowledge about HBV routes of transmission has been found to also contribute to  
25 Hepatitis B stigma in other locales, such as China.<sup>36</sup>

26  
27  
28  
29  
30  
31  
32  
33  
34 The stigmatisation of PWHB manifests in many ways. Previous studies conducted outside of  
35 Ghana have reported social exclusion, problems with close relations including friends and  
36 families, and loss of employment as some of the ways in which Hepatitis B stigma presents.<sup>33</sup>  
37  
38  
39  
40  
41  
42  
43  
44  
45  
46  
47  
48  
49  
50  
51  
52  
53  
54  
55  
56  
57  
58  
59  
60  
61  
62  
63  
64  
65  
66  
67  
68  
69  
70  
71  
72  
73  
74  
75  
76  
77  
78  
79  
80  
81  
82  
83  
84  
85  
86  
87  
88  
89  
90  
91  
92  
93  
94  
95  
96  
97  
98  
99  
100  
101  
102  
103  
104  
105  
106  
107  
108  
109  
110  
111  
112  
113  
114  
115  
116  
117  
118  
119  
120  
121  
122  
123  
124  
125  
126  
127  
128  
129  
130  
131  
132  
133  
134  
135  
136  
137  
138  
139  
140  
141  
142  
143  
144  
145  
146  
147  
148  
149  
150  
151  
152  
153  
154  
155  
156  
157  
158  
159  
160  
161  
162  
163  
164  
165  
166  
167  
168  
169  
170  
171  
172  
173  
174  
175  
176  
177  
178  
179  
180  
181  
182  
183  
184  
185  
186  
187  
188  
189  
190  
191  
192  
193  
194  
195  
196  
197  
198  
199  
200  
201  
202  
203  
204  
205  
206  
207  
208  
209  
210  
211  
212  
213  
214  
215  
216  
217  
218  
219  
220  
221  
222  
223  
224  
225  
226  
227  
228  
229  
230  
231  
232  
233  
234  
235  
236  
237  
238  
239  
240  
241  
242  
243  
244  
245  
246  
247  
248  
249  
250  
251  
252  
253  
254  
255  
256  
257  
258  
259  
260  
261  
262  
263  
264  
265  
266  
267  
268  
269  
270  
271  
272  
273  
274  
275  
276  
277  
278  
279  
280  
281  
282  
283  
284  
285  
286  
287  
288  
289  
290  
291  
292  
293  
294  
295  
296  
297  
298  
299  
300  
301  
302  
303  
304  
305  
306  
307  
308  
309  
310  
311  
312  
313  
314  
315  
316  
317  
318  
319  
320  
321  
322  
323  
324  
325  
326  
327  
328  
329  
330  
331  
332  
333  
334  
335  
336  
337  
338  
339  
340  
341  
342  
343  
344  
345  
346  
347  
348  
349  
350  
351  
352  
353  
354  
355  
356  
357  
358  
359  
360  
361  
362  
363  
364  
365  
366  
367  
368  
369  
370  
371  
372  
373  
374  
375  
376  
377  
378  
379  
380  
381  
382  
383  
384  
385  
386  
387  
388  
389  
390  
391  
392  
393  
394  
395  
396  
397  
398  
399  
400  
401  
402  
403  
404  
405  
406  
407  
408  
409  
410  
411  
412  
413  
414  
415  
416  
417  
418  
419  
420  
421  
422  
423  
424  
425  
426  
427  
428  
429  
430  
431  
432  
433  
434  
435  
436  
437  
438  
439  
440  
441  
442  
443  
444  
445  
446  
447  
448  
449  
450  
451  
452  
453  
454  
455  
456  
457  
458  
459  
460  
461  
462  
463  
464  
465  
466  
467  
468  
469  
470  
471  
472  
473  
474  
475  
476  
477  
478  
479  
480  
481  
482  
483  
484  
485  
486  
487  
488  
489  
490  
491  
492  
493  
494  
495  
496  
497  
498  
499  
500  
501  
502  
503  
504  
505  
506  
507  
508  
509  
510  
511  
512  
513  
514  
515  
516  
517  
518  
519  
520  
521  
522  
523  
524  
525  
526  
527  
528  
529  
530  
531  
532  
533  
534  
535  
536  
537  
538  
539  
540  
541  
542  
543  
544  
545  
546  
547  
548  
549  
550  
551  
552  
553  
554  
555  
556  
557  
558  
559  
560  
561  
562  
563  
564  
565  
566  
567  
568  
569  
570  
571  
572  
573  
574  
575  
576  
577  
578  
579  
580  
581  
582  
583  
584  
585  
586  
587  
588  
589  
590  
591  
592  
593  
594  
595  
596  
597  
598  
599  
600  
601  
602  
603  
604  
605  
606  
607  
608  
609  
610  
611  
612  
613  
614  
615  
616  
617  
618  
619  
620  
621  
622  
623  
624  
625  
626  
627  
628  
629  
630  
631  
632  
633  
634  
635  
636  
637  
638  
639  
640  
641  
642  
643  
644  
645  
646  
647  
648  
649  
650  
651  
652  
653  
654  
655  
656  
657  
658  
659  
660  
661  
662  
663  
664  
665  
666  
667  
668  
669  
670  
671  
672  
673  
674  
675  
676  
677  
678  
679  
680  
681  
682  
683  
684  
685  
686  
687  
688  
689  
690  
691  
692  
693  
694  
695  
696  
697  
698  
699  
700  
701  
702  
703  
704  
705  
706  
707  
708  
709  
710  
711  
712  
713  
714  
715  
716  
717  
718  
719  
720  
721  
722  
723  
724  
725  
726  
727  
728  
729  
730  
731  
732  
733  
734  
735  
736  
737  
738  
739  
740  
741  
742  
743  
744  
745  
746  
747  
748  
749  
750  
751  
752  
753  
754  
755  
756  
757  
758  
759  
760  
761  
762  
763  
764  
765  
766  
767  
768  
769  
770  
771  
772  
773  
774  
775  
776  
777  
778  
779  
780  
781  
782  
783  
784  
785  
786  
787  
788  
789  
790  
791  
792  
793  
794  
795  
796  
797  
798  
799  
800  
801  
802  
803  
804  
805  
806  
807  
808  
809  
810  
811  
812  
813  
814  
815  
816  
817  
818  
819  
820  
821  
822  
823  
824  
825  
826  
827  
828  
829  
830  
831  
832  
833  
834  
835  
836  
837  
838  
839  
840  
841  
842  
843  
844  
845  
846  
847  
848  
849  
850  
851  
852  
853  
854  
855  
856  
857  
858  
859  
860  
861  
862  
863  
864  
865  
866  
867  
868  
869  
870  
871  
872  
873  
874  
875  
876  
877  
878  
879  
880  
881  
882  
883  
884  
885  
886  
887  
888  
889  
890  
891  
892  
893  
894  
895  
896  
897  
898  
899  
900  
901  
902  
903  
904  
905  
906  
907  
908  
909  
910  
911  
912  
913  
914  
915  
916  
917  
918  
919  
920  
921  
922  
923  
924  
925  
926  
927  
928  
929  
930  
931  
932  
933  
934  
935  
936  
937  
938  
939  
940  
941  
942  
943  
944  
945  
946  
947  
948  
949  
950  
951  
952  
953  
954  
955  
956  
957  
958  
959  
960  
961  
962  
963  
964  
965  
966  
967  
968  
969  
970  
971  
972  
973  
974  
975  
976  
977  
978  
979  
980  
981  
982  
983  
984  
985  
986  
987  
988  
989  
990  
991  
992  
993  
994  
995  
996  
997  
998  
999  
1000

The stigmatisation of PWHB manifests in many ways. Previous studies conducted outside of Ghana have reported social exclusion, problems with close relations including friends and families, and loss of employment as some of the ways in which Hepatitis B stigma presents.<sup>33 35-37</sup> Hepatitis B stigmatisation also occurs across a number of settings and contexts, including healthcare settings.<sup>38 39</sup> For example, Wada and colleagues<sup>38</sup> found that some healthcare providers in Japan were reluctant to care for patients with chronic Hepatitis B due to fear of infection.

The stigmatisation of PWHB has substantial consequences. It has been found to create an environment of secrecy and denial, can lead to depression, and can be a barrier to health care seeking, including screening and treatment.<sup>28 32 39-41</sup> Additionally, fear of being stigmatised, rejected, and discriminated against has been found to motivate PWHB to conceal their positive status from family and friends,<sup>25 39 42 43</sup> and non-disclosure of HBV status can contribute to further infections.<sup>44</sup> Stigmatisation can also deter people at risk for HBV infection from getting tested, obtaining treatment when eligible, and from seeking assistance for risk reduction.<sup>28 32 41</sup>

Given the high prevalence of Hepatitis B in Ghana,<sup>3</sup> and the paucity of evidence on Hepatitis B stigma in Ghana, this study sought to explore beliefs contributing to Hepatitis B stigma, and the ways in which Hepatitis B stigma manifests, from the perspectives of people with chronic Hepatitis B as well healthcare providers in Northern and Southern Ghana. Understanding this

phenomenon is important as it can inform the design of effective Hepatitis B and stigma prevention interventions, as well as Hepatitis B policies in Ghana and beyond.

## **METHODS**

### **Study Design**

An exploratory qualitative design was used to explore the perspectives of PWHB and HCPs on Hepatitis B stigma in Ghana. This design was deemed best suited for this study because there is very limited documented evidence on Hepatitis B stigma in Ghana.<sup>45</sup> Ethical approval was given by the Korle-Bu Institutional Review Board (Approval number KBTH-IRB 00092/2016). This study is part of larger research project focusing on Hepatitis B stigma. In this article, we report only on the findings that pertain to manifestations of stigma and the beliefs that underlie those manifestations.

### **Study Setting**

The study was conducted in two public health facilities in Ghana. Ghana is a tropical country on the West coast of Africa.<sup>46</sup> According to the most recent census, the population of Ghana was about 28, 308, 301 in 2016.<sup>47</sup> There are ten administrative regions in the country. Each of the regions has a regional hospital which serves as a referral centre for the district hospitals. Also, the country has three main teaching hospitals.<sup>48</sup> A special clinic for patients with liver conditions, including Hepatitis B, are run at the tertiary hospitals whereas PWHB are mostly treated as out-patient cases in regional hospitals. One tertiary hospital in the South and one regional hospital in the North were selected for the study. The selection of the study areas was based on the differences in terms of tradition and culture in the selected regions. People from the Northern region tend to uphold to their tradition and culture to a greater extent than people in the South where urbanisation seems to impact the preservation of tradition and culture.

In Ghanaian society, people tend to attach beliefs to the cause of illnesses depending on their religious affiliation. For example, Christians and Muslims recognise God as one who controls life events and one who has the power to deliver people from bad situations including illnesses. Similarly, those with traditional beliefs also tend to attribute the cause of unusual events including illness to consequences of a sin against the gods.

### **Study Population**

We recruited PWHB and HCPs including primary physicians, nurses, and midwives in both Northern and Southern Ghana for the purposes of data source triangulation. Ensuring triangulation was imperative to understanding the Hepatitis B stigma comprehensively and to further validating information obtained from the participants.<sup>49</sup> Inclusion of HCPs was deemed appropriate as they play an important role in the provision of care to PWHB. Also, given that stigma is experienced by PWHB in clinical settings, including the perspectives of HCPs was considered important.

## Participant Eligibility

### Inclusion Criteria

PWHB were included in the study if they were (1) 18 years or older, and (2) had tested Hepatitis B surface antigen (HBsAg) positive at least 6 months prior to recruitment. The inclusion criterion for HCPs was (1) having cared for patients with Hepatitis B in a healthcare setting.

### Exclusion Criteria

PWHB who were in the terminal stage of Hepatitis B and had insufficient energy to participate in an interview were excluded. Only one person in the terminal stage was seen in the tertiary hospital. He was not included because he was in a state of dyspnoea (breathlessness). Also, HCPs who had less than three months working experience in a department where services are provided for PWHB were excluded as these HCPs might not have enough experience to discuss their perspectives on Hepatitis B in their role as HCP.

### Sampling Method and Data Collection Procedure

A purposeful sampling technique was employed.<sup>50 51</sup> First, posters with details of the study, including information about the purpose of the study, assurance of the voluntary nature of the study, as well as the procedure for registration, were advertised in the selected health facilities. In addition, PWHB and HCPs were recruited directly through nurses at the health facilities. Among PWHB, 6 were recruited through the advertisement and the remaining 12 were recruited through nurses in the hospitals. Among HCPs, 10 were recruited through advertisement and 37 were recruited through nurses in the hospitals. In total, 16 participants were recruited through the advertisements and 49 through nurses. Two PWHB refused to participate. One cited time constraints as the reason and the other declined to provide a reason. An additional 5 HCPs did not honour the invitation as a result of an emergency call at work or a conflicting schedule with other unplanned (social) events. PWHB participated in semi-structured in-depth interviews. HCPs were either interviewed or participated in a focus group discussion (FGD). The combination of interviews and FGD for HCP assisted in understanding and describing the phenomenon comprehensively and further ensured the trustworthiness of the findings<sup>52</sup>. One important observation that was made during the FGD was that the participant's built on the ideas of their colleagues which added some details to the data. In fact, the use of the FGD for the HCPs stimulated each other's thoughts. However, given the sensitive nature of the topic and the extent to which responses to the study questions could be quite personal for PWHB, PWHB were not recruited for FGDs. Interviews were deemed more appropriate.<sup>53</sup>

The interviews and FGD were conducted by the first author (CAA) who is a PhD candidate with a background in qualitative research including conducting and analysing interviews and FGD. He is also fluent in English and the local Ghanaian language (Twi) but all interviews and FGD were done in English. Two days before the interview/FGD, participants were contacted by telephone to remind them of the appointment. The interviews/FGDs were conducted mostly in the homes of those with chronic Hepatitis B (under trees) and the workplace of HCPs (nurses' stations and physician's consulting rooms). The informed consent form was signed by all participants following an explanation of the purpose of the study and explicit mention of

1  
2  
3 the confidential and voluntary nature of their participation. In addition, permission was sought  
4 from participants to record the interview/FGD. Field notes were taken during the interviews  
5 and the FGDs.  
6  
7

8 Data were collected between February and November 2017. In total, 18 in-depth interviews  
9 were conducted with PWHB and 15 in-depth interviews with HCPs. Additionally, 4 FGD with  
10 a composition of 8 HCPs in each group were conducted. The interviews involving PWHB and  
11 HCPs lasted between 45 minutes and 1 hour whereas the FGDs with HCPs lasted  
12 approximately 1 hour and 15 minutes. Data saturation was reached after the interview of the  
13 14<sup>th</sup> PWHB and 12<sup>th</sup> HCP.<sup>52</sup>  
14  
15  
16

### 17 **Research Instrument**

18 The interview and FGD were guided by a semi-structured protocol with the flexibility to probe.  
19 The protocol was developed based on empirical literature on Hepatitis B stigma<sup>54</sup> and then  
20 reviewed by an expert in stigma (SS). Subsequently, the interview protocol was piloted with  
21 two PWHB and two HCPs. Topics explored during the interviews with PWHB included: (1)  
22 participants' experiences with being treated differently because of their HBV sero-positivity  
23 and the settings in which those experiences took place; (2) perceived reasons for being treated  
24 differently; and (3) the impact of those experiences. Topics explored in the interviews and  
25 FGDs with HCPs were: (1) perceptions about Hepatitis B; (2) the extent to which they have  
26 provided care to someone with Hepatitis B; (3) their reactions to PWHB; and (4) possible  
27 reasons for possible negative reactions to PWHB. A detailed interview protocol can be found  
28 in the supplementary material 1.  
29  
30  
31  
32  
33

### 34 **Data Analysis**

35 Data were processed with QSR Nvivo version 10.0 and analysed using inductive thematic  
36 analysis.<sup>55</sup> The first author (CAA) played and listened to the audio recordings and transcribed  
37 verbatim. The first transcribed data were coded by two of the authors (CAA and SS) followed  
38 by discussions on the individual codes, and, later, the categories and themes generated.  
39 Consensus was reached on the codes, and the main themes and sub-themes were documented.  
40 Preliminary findings were checked with two representatives of the study population to ascertain  
41 if the findings were in line with their views and experiences. Two main themes and eight sub-  
42 themes emerged from the data. These are summarised in Table 1.  
43  
44  
45  
46  
47

### 48 **Patient/Public Involvement**

49 Patients and the public were not involved in the development of the research questions, the  
50 design, recruitment, and conduct of the study. The study results will be shared with the  
51 participants and other relevant stakeholders through various social media handles, and  
52 conference presentations.  
53  
54  
55  
56  
57  
58  
59  
60



## RESULTS

### Demographic Characteristics

We recruited, in total, 18 PWHB and 47 HCPs, of which 8 were physicians, 34 were nurses, and 5 were midwives. PWHB were between 21 and 57 years of age and the HCPs were between 23 and 49 years of age. PWHB had lived with HBV between 1 and 7 years and had been diagnosed through one of the following means: self-initiated, physician initiated, during outreach screening services, and as a result of hospital protocol for pregnant women. The HCPs had practised medicine, nursing, or midwifery between 1 and 20 years. Detailed socio-demographic data for PWHB and HCPs are presented in Table 2 and Table 3 respectively.

### Beliefs About Hepatitis B

PWHB and HCP reported that, in Ghana, Hepatitis B is considered highly contagious and very severe. Additionally, Hepatitis B is sometimes associated with curses. These themes are described in detail below.

#### Hepatitis B as highly contagious

Participants with Hepatitis B reported that people in their community believe that Hepatitis B can be acquired through casual contact such as handshaking, touching, and eating from the same bowl with someone with Hepatitis B. These perceived modes of transmission were reported to have created fear and panic within the Ghanaian social arena. The situation was further posited to be compounded by the belief that sweat is a medium by which Hepatitis B can be transmitted. One participant with chronic Hepatitis B said the following:

*“It is well known that when someone with Hepatitis B’s sweat touches you, you can also get the disease or when he shares the same eating bowl with you, you can be infected with the virus by his saliva. This information scares many people and therefore as soon as they get to know you have Hepatitis B, they tend to dissociate themselves from you.”* (PWHB, South-IDI 2<sup>1</sup>)

Another participant with chronic Hepatitis B also recounted his experience in school as follows:

*“When we were in school, we knew that the virus could be found in human sweat. With this understanding, when someone meets you lying on his mattress, he becomes very furious because you have the tendency of infecting him with the virus. If you use someone’s spoon or cup and he sees it, that is it, you will have it forever. He will prefer to buy a new one than to use the one used by you to get the virus.”* (PWHB, North-IDI 7)

According to one PWHB, the fear of infection on the part of others is the result of a lack of knowledge,

---

<sup>1</sup> All names have been changed to protect the identity of participants



1  
2  
3  
4  
5  
6  
7  
8  
9  
10  
11  
12  
13  
14  
15  
16  
17  
18  
19  
20  
21  
22  
23  
24  
25  
26  
27  
28  
29  
30  
31  
32  
33  
34  
35  
36  
37  
38  
39  
40  
41  
42  
43  
44  
45  
46  
47  
48  
49  
50  
51  
52  
53  
54  
55  
56  
57  
58  
59  
60

*“There is a lot of false information about Hepatitis B in the public domain which puts fear in everyone. Some have the mind-set that you can get the virus from an infected person through a handshake. This makes people alarmed when they know you have the virus.” (PWHB, South-IDI 11)*

The belief that Hepatitis B is easily transmitted was also held by HCPs. Some reported that because of this, they have assigned unique names to chronic Hepatitis B positive patients for easy identification and notification. Also, HCPs reported treating PWHB differently because they fear possible infection.

*“I am a midwife and in the ward, we have given those with Hepatitis B names. We call them candidates. When we identify you as a candidate, most midwives don’t want to touch such a person. Even we ignore their money because we believe that where she kept the money sweat could get to it and therefore we don’t like it.” (HCP, North-FGD 13)*

### **Hepatitis B as very severe**

Participants indicated that many people think Hepatitis B is not only easily transmitted but also very severe. Hepatitis B was claimed to be a condition with poor prognosis that eventually leads to death. One participant with chronic Hepatitis B shared her view as follows:

*“Everyone is afraid of the Hepatitis B virus. Since it is known that it kills, no one wants to have anything to do with people who have it. Many people are aware of HIV but because it is well publicised that Hepatitis B is more deadly than HIV, people are terrified when getting closer to those who are known to have Hepatitis B.” (PWHB, South-IDI 18).*

Another HCP said, *“People who are aware of Hepatitis B know that it kills. They are very cautious when they hear that someone has Hepatitis B.” (HCP, South-IDI 2).*

Along similar lines, participants reported Hepatitis B to be incurable.

*“What scares us is the information that Hepatitis B has no cure. It therefore means that is either you die with it or you live with it forever. HIV which is a popular disease seems to be better than Hepatitis B because there are drugs to keep you alive when you get it.” (PWHB, North-IDI 14)*

The severity of Hepatitis B was further emphasized by comparisons that were made with HIV, a condition that is also considered to be very severe. Interestingly, Hepatitis B was considered to be more severe than HIV: *“People say it is deadly, it kills faster than HIV/AIDS.” (HCP, South-IDI 12)*

### **Hepatitis B as a curse**

Another belief held about Hepatitis B by participants is that Hepatitis B affects people who have been cursed for some kind of wrong doing. This was reported to be based on the fact that people in advanced stages of Hepatitis B clinically present with ascites, jaundice, and oedema, and these presentations are linked to punishment from gods in Ghanaian society. According to a number of the participants, people in their community believe that people with swollen abdomens and feet are cursed for not respecting or taking care of their parents.

*“Ascites [enlarged abdomen] and oedema [swollen feet] is one thing that society perceives as caused by curses. Once they see it, they believe that the person has been cursed. The family members don’t want to get closer since they feel that it is happening because of the person’s bad deeds.”* (HCP, North-FGD 16)

Participants spoke of how, in certain circumstances, family members seek alternative treatment for Hepatitis B when they are convinced that the gods are the cause of the complications. They seek spiritual support and this often delays health care seeking. One HCP recounted her experience with her father who had been Hepatitis B positive.

*“My father had Hepatitis B and died. He grew very lean, his stomach bloated and they said it was a curse from the family. He wasn’t taken to the hospital and he was neglected by his siblings. He was moved from one prayer camp to the other, one church to the other, thinking he would be cured but when he was brought back to the house, the infection was worse than before. His eyes were very yellowish and he was very lean.”* (HCP, South-IDI 11)

Furthermore, a report by a HCP revealed some of the rituals that are performed in the healthcare settings before the corpse of a person with chronic Hepatitis B is taken out for a burial. According to the participant, this is done to prevent possible transmission of the disease to the family members of the deceased.

*“Sometimes when they [PWHB] die, the relatives perform some rituals to cleanse themselves before the body is conveyed to the morgue.”* (HCP, North-IDI 6)

### **Manifestations of Stigma**

In addition to reporting common beliefs about Hepatitis B in Ghana, participants also reported a number of ways in which Hepatitis B stigma manifests, in general and specifically in healthcare settings.

### **Avoidance**

One manifestation of Hepatitis B stigma reported by participants was avoidance. A participant with chronic Hepatitis B recounted her experience following diagnosis and disclosure of her status to her close relative.

1  
2  
3  
4  
5  
6  
7  
8  
9  
10  
11  
12  
13  
14  
15  
16  
17  
18  
19  
20  
21  
22  
23  
24  
25  
26  
27  
28  
29  
30  
31  
32  
33  
34  
35  
36  
37  
38  
39  
40  
41  
42  
43  
44  
45  
46  
47  
48  
49  
50  
51  
52  
53  
54  
55  
56  
57  
58  
59  
60

*“As soon as they see that you have Hepatitis B, they start avoiding you; something you pick, they won’t pick; something you have used, they don’t want to get closer to it. At first, I used to do things together with my uncle. Whenever he is eating, I can put my hand in it and eat with him. After I told him that I was Hepatitis B positive, he avoids me completely. Anytime he returns from work he just greets me and enters his room. I don’t see him to chat and joke like the way we used to.” (PWHB, South-IDI 3)*

Another participants with chronic Hepatitis B also, reported avoidance by family as follows:

*“When my household members see me, they change their conversation. When they are chatting and I go to sit down, then they get up. They treat you as if you have shit on yourself. Everyone leaves you with so many excuses.” (PWHB, North-IDI 16)*

Yet another participant with Hepatitis B reported the following:

*“Many people see those with Hepatitis B as sources of infection because they think it can be transmitted through sweat. They are sometimes afraid to go closer to them especially when the person looks jaundiced (yellowish) and the stomach becomes big. Everyone becomes scared and they may treat the person like a leper by distancing themselves from the person.” (PWHB, South-IDI 15)*

Avoidance was also reported to occur in the healthcare settings. One HCP shared how she avoided a colleague after learning she had Hepatitis B.

*“I was working at one sub-district and the staff were friendly and so we were eating together. One day, we were chatting and a colleague said, ‘she is Hepatitis B positive’. From that day, I never ate with them again because I felt uncomfortable. Knowing that the virus can be in the saliva and there could be exchange of saliva while eating from the same bowl, I was afraid of getting the infection so I stopped eating with them.” (HCP, North-FGD 8)*

Some of the avoidance reported was said to be based on speculations. People who were known or suspected to have a sexual relationship with a person with Hepatitis B were also avoided.

*“I was in a community health centre with subordinates who were young nurses. They were eating together, doing everything together and very close until there was a death of a man. It came out that the person died of Hepatitis B and one of the nurses was said to be the girlfriend. After the funeral, the girl was deserted. The eating together could not continue and, in fact, the girl became very worried and miserable because the relationship with her colleagues changed.” (HCP, North-FGD 30)*

Another participant narrated a similar experience as follows:

*“I stayed in a compound house with a certain lady who was befriending someone positive of Hepatitis B. Later, somebody in the yard got to know that the man was Hepatitis B positive and*

1  
2  
3 *the news spread in the yard. Nobody was coming near her veranda because they concluded*  
4 *that once the guy had Hepatitis B then the lady has also gotten it. When they are sitting in the*  
5 *yard and she comes to sit, they all enter their rooms. Nobody was going close to her until she*  
6 *had a quarrel with one of the residents and she was insulted as having Hepatitis B. That was*  
7 *when the lady got to know why everybody was avoiding her.” (HCP, North-FGD 4)*  
8  
9

10  
11 Additionally, participants indicated that family members sometimes distance themselves  
12 because they see distancing themselves as a way of escaping the wrath of the gods, reflecting  
13 again the belief that Hepatitis B can be the result of a curse from the gods.  
14

15  
16 *“People fear to be closer to someone who has been cursed so they withdraw from the person*  
17 *in order not to attract the anger of the gods.” (HCP, North-FGD 27)*  
18  
19

### 20 21 **Social isolation**

22 Participants also reported social isolation as a manifestation of stigma. They reported that, in  
23 some senior high schools where students reside in the dormitories, those with chronic Hepatitis  
24 B are isolated from their peers in an effort to prevent possible transmission of the virus to other  
25 students. One HCP narrated an encounter she had with a man, whose son suffered this treatment  
26 in school, as follows:  
27  
28

29  
30 *“I met one man who was lamenting that his son in a senior high school was ejected from the*  
31 *school dormitory because he tested Hepatitis B positive. The boy has been isolated and now*  
32 *sleeps in the classroom. The school authorities feel that, if they don’t isolate those who are*  
33 *positive, they will end up infecting everybody and more students. Parents are compelled to get*  
34 *houses outside school campus for such students.” (HCP, North-FGD 14)*  
35  
36  
37

38 Participants also indicated that, in some parts of Northern Ghana, people who test Hepatitis B  
39 positive are subsequently confined to their rooms. They are treated as outcasts and have many  
40 social restrictions. Additionally, some PWHB reported having family roles taken from them  
41 and being denied participation in family functions. A participant with chronic Hepatitis B  
42 shared her observations as follows:  
43  
44

45  
46 *“The person is isolated when family members are made aware of his/her Hepatitis B positive*  
47 *status. If they were cooking in one pot, the person ceases to cook with them. They give them*  
48 *their own room and sometimes put the person very far away. They [PWHB] don’t move around*  
49 *and always stay inside mourning their dead when not dead. They only come and throw their*  
50 *food to them to take and eat. They won’t let you feel that you are also normal like them.”*  
51 *(PWHB, North-DI 8)*  
52  
53

54  
55 Similarly, a HCP recounted her experience with a family that nearly ex-communicated their  
56 daughter because of fear of possible transmission of the virus to other relations.  
57  
58  
59  
60

1  
2  
3 *“I had a fourteen-year-old pregnant lady who had Hepatitis B. I counselled her and the mother.*  
4 *When they returned to the house, the father denied the girl opportunity to stay with them to*  
5 *prevent others getting infected. The father thought that people with Hepatitis B are not*  
6 *supposed to eat with anyone and the person must use a separate bowl, cups etc. Based on this,*  
7 *he could not accept the girl in the house for fear of passing on the infection to the entire family.”*  
8  
9 (HCP, North-FGD 21)  
10  
11

12 The social isolation of PWHB was additionally reported to occur in healthcare settings. In this  
13 context, social isolation occurred because, according to participants, people tend to believe, as  
14 reported above, that an infected person can pass the infection to others through sweat. This was  
15 claimed to motivate HCPs actions to separate PWHB from other patients. *“We put them*  
16 *[PWHB] at the extreme corner where no one goes there.”* (HCP, North-IDI 3)  
17  
18

19 Isolation of PWHB was also reported to worsen when PWHB exhibit severe forms of  
20 jaundice.  
21  
22

23  
24 *“Some people feel that when you have Hepatitis B and you look yellowish, it means that the*  
25 *viruses are too many in your blood. At that point, everyone withdraws. When the person dies,*  
26 *they don’t waste time to keep his/her body for proper funeral but quickly bury the person. I*  
27 *have seen a number of cases like that in my village.”* (PWHB, North-IDI 3)  
28  
29

### 30 31 **Stigmatisation in health care settings**

32 Specific manifestations of stigma in health care settings were reported as well. In healthcare  
33 settings, stigma was reported to not only manifest as avoidance and social isolation as outlined  
34 above, but also as excessive cautiousness, task-shifting, procedure postponement and  
35 avoidance, and breaches of confidentiality.  
36  
37

#### 38 39 **Excessive cautiousness**

40 Participants reported that excessive cautiousness was taken by HCPs when providing care to  
41 patients with chronic Hepatitis B. This was evidenced by the use of extreme infection  
42 prevention precautions. In some instances, HCPs stated that they wore extra gloves to prevent  
43 possible acquisition of the virus.  
44  
45

46  
47 *“Anytime I am managing someone with Hepatitis B, I am extra careful. I put on more than one*  
48 *glove and also wash my hands regularly.”* (HCP, South-FGD 20)  
49  
50

51 Another HCP explained how this is related to the belief that Hepatitis B is highly contagious.  
52

53 *“When you get to know that the patient has Hepatitis B infection, the mind-set changes outright.*  
54 *You become very cautious because you are afraid of getting infected.”* (HCP, South-IDI 9)  
55  
56

57 Notwithstanding, some HCPs indicated that their actions were dependent on the kind of  
58 procedure.  
59  
60



1  
2  
3  
4  
5  
6  
7  
8  
9  
10  
11  
12  
13  
14  
15  
16  
17  
18  
19  
20  
21  
22  
23  
24  
25  
26  
27  
28  
29  
30  
31  
32  
33  
34  
35  
36  
37  
38  
39  
40  
41  
42  
43  
44  
45  
46  
47  
48  
49  
50  
51  
52  
53  
54  
55  
56  
57  
58  
59  
60

*“Sometimes it depends on what you are going to do for the person. For instance, when I am going to empty the urine bag, I put on three gloves. But when I am feeding them, I don’t do that because I know I am not coming into contact with anybody’s fluid.”* (HCP, South-FGD 22)

Some HCPs reported that negative perceptions about Hepatitis B compromises, to some extent, the quality of care individuals with chronic Hepatitis B receive.

*“I’ve seen a couple of cases where midwives were very careful not wanting to assist the delivery of Hepatitis B positive woman. Even the baby that was born, they were very sceptical touching her and the mother. The way they handled them and the way they talked about it - “whispering” when they are handing over - sometimes it is very obvious that they are stigmatising the client.”* (HCP, South- IDI 1)

### **Procedure postponement or avoidance and task-shifting**

The majority of the participating HCPs indicated that postponement or avoidance of procedures and task shifting are common when caring for PWHB. This was reported to occur because of the perceived contagiousness of Hepatitis B.

*“When we see them [PWHB] at the critical stage, some vomiting blood and coughing out blood, you will see some nurses postponing procedures because they think that they can be infected.”* (HCP, North-FGD 5)

Another participant reported procedure avoidance:

*“I ever sent a patient to the hospital. The intravenous line infiltrated and the nurses were supposed to change it. I was amazed that no nurse was ready to do it. This nurse will say to the other to go and do it. Another said let’s wait for the doctor and giggled. So I was getting afraid. Is this person having HIV or what that no one seems interested working on him?”* (HCP, North-FGD 23)

Yet another HCP narrated a similar experience with a Hepatitis B positive patient as follows:

*“We had one Hepatitis B case that came in a coma state and if you look at the severity of the condition, most of the staff were not willing to provide any service for the patient. The patient was restless and ended up losing his life after three days. After he died, nobody even wanted to go closer to his dead body because we were afraid that we could be infected.”* (HCP, South-IDI 10)

A number of the participants indicated that, when a patient has Hepatitis B, some HCPs shift their tasks such that student nurses have to perform them. A nurse recounted her experience during her formal clinical training as follows:

*“During our clinical placement, when cases like Hepatitis B are admitted, it was we, the students, that the nurses used to send to go and manage those clients. In fact, they won’t let*

1  
2  
3  
4  
5  
6  
7  
8  
9  
10  
11  
12  
13  
14  
15  
16  
17  
18  
19  
20  
21  
22  
23  
24  
25  
26  
27  
28  
29  
30  
31  
32  
33  
34  
35  
36  
37  
38  
39  
40  
41  
42  
43  
44  
45  
46  
47  
48  
49  
50  
51  
52  
53  
54  
55  
56  
57  
58  
59  
60

*you know the exact condition until you cannot do something. Even that, when one of them is coming to help you, the gloves will be more than five. Even with that, she will still come and stand and say, “hold this place”, “do that”. She will not do it. So, if they begin to do that and you also take the patient’s folder and you see that it is Hepatitis B, then you advise yourself”* (HCP, North - FGD 19)

Similarly, another nurse reported the following experience:

*“During my first clinical attachment as a student nurse, Hepatitis B patients were put in the cubicle or an isolated veranda. Anytime they [nurses] were to attend to them, either during dressing, checking of vital signs, it was student nurses that they ask us to go and do.”* (HCP, North-FGD 10)

### **Breaches of confidentiality**

The final manifestation of stigma reported to occur in healthcare settings was breaches of confidentiality. Participants reported that some HCPs fail to maintain confidentiality. According to participants working in the healthcare sector, it is common to receive information about PWHB from a colleague in the various hospital wards and units.

*“The moment they diagnose somebody Hepatitis B positive, even if it is one single nurse who is on duty, the whole hospital will hear. The nurse will circulate the information until that ward nurses finish and everybody is informed. If the person is pregnant, it will even spread to the antenatal unit and then to maternity ward and every nurse become careful with such a person.”* (HCP, North-FGD 28)

## **DISCUSSION**

This study set out to explore beliefs contributing to Hepatitis B stigma, and the ways in which Hepatitis B stigma manifests, from the perspectives of people with chronic Hepatitis B as well as healthcare providers in Northern and Southern Ghana. Our findings demonstrated that three main beliefs underlie Hepatitis B stigma in Ghana, namely 1) the belief that Hepatitis B is highly contagious; 2) the belief that Hepatitis B is very severe; and c) the belief that Hepatitis B is caused by curses. In healthcare settings, stigmatisation manifested as excessive cautiousness, procedure postponement or avoidance, task-shifting, and breaches of confidentiality.

The belief that Hepatitis B is highly contagious was reported by both PWHB and HCPs as central to stigma in Ghana. Contributing to this perceived contagiousness were beliefs that Hepatitis B can be transmitted through casual contact such as handshaking, touching, and the sharing of eating utensils with people with chronic Hepatitis B and a focus on body fluids, such as sweat, as a source of infection. Stigmatisation originating from a fear of infection is not particular to Ghana, but has been reported in other locations as well.<sup>26 33 42 55 56-59</sup> For example, in Parkistan, Rafique and colleagues<sup>33</sup> indicated that PWHB experienced stigmatising reactions from their families who feared infection and thus refused to share eating and drinking utensils,



1  
2  
3 as well as soap and towels, with relatives living with chronic Hepatitis B. That sweat was  
4 considered to be an important source of HBV transmission leading to avoidance of PWHB has  
5 also previously been documented by a study conducted in Nigeria.<sup>60</sup> However, sweat is not a  
6 vehicle for HBV transmission<sup>61</sup> and this suggests a knowledge deficit regarding Hepatitis B  
7 transmission not only among the general public in Ghana but also among HCPs. This is  
8 particularly disconcerting given that HCPs are considered an important source of Hepatitis B  
9 information by their patients.<sup>62</sup>

10  
11  
12  
13 Our study further showed that the belief that Hepatitis B is very severe is also present in Ghana  
14 and that this belief contributes to stigmatisation. Generally, participants perceived Hepatitis B  
15 as deadly and reported that others think PWHB will inevitably die. The belief that Hepatitis B  
16 is very severe is consistent with a study conducted by Upadhyaya et al.<sup>63</sup> in the United States,  
17 where the role and attitudes of primary care physicians in Hepatitis B diagnosis and treatment  
18 were assessed. The results showed that physicians perceived Hepatitis B as very serious.<sup>63</sup>  
19 Interestingly, in our study, and in previous studies conducted in Ghana<sup>34</sup> and in the  
20 Netherlands,<sup>64</sup> Hepatitis B was associated with, and perceived to be even more severe, than  
21 HIV. It is possible that in the Ghanaian context, this is attributable to the fact that Hepatitis B  
22 is not optimally managed. Unlike HIV, antiretroviral treatment for Hepatitis B is not readily  
23 available and affordable.<sup>16 44</sup> Additionally, the number of specialised clinics that can monitor  
24 and support PWHB is inadequate<sup>34</sup> and the WHO policy on treatment, management, and  
25 support of PWHB in Ghana has not yet been implemented.<sup>65 34</sup> Further, with the exception of  
26 Hepatitis B testing, which is covered by the national health insurance scheme when requested  
27 by physicians, Hepatitis B vaccination is offered at a fee in Ghana. The only national policy on  
28 Hepatitis B prevention in Ghana is the administration of Hepatitis B pentavalent vaccine to  
29 newborn babies at 6, 10, and 14 weeks after birth.<sup>34</sup>

30  
31  
32  
33  
34  
35  
36  
37 Another finding of this study was that, in Ghana, there is a belief that Hepatitis B is caused by  
38 curses. An earlier study showed that people do attach superstitious beliefs to Hepatitis B in  
39 Ghana.<sup>34</sup> Also, a study conducted by Adjei et al.<sup>66</sup> found that 86% ( $n=168$ ) of participants  
40 linked the cause of Hepatitis B to curses. This association is unsurprising given that some  
41 clinical manifestations of Hepatitis B, including swollen abdomen and feet, are analogous to  
42 the perceived outcomes of a curse in Ghanaian culture. In Ghana, people are particularly  
43 cautious about handling items perceived to be cursed as not handling them can help to avoid  
44 possible transfer of the consequences of that curse.

45  
46  
47  
48 In addition to documenting beliefs about Hepatitis B that contribute to stigmatisation, we also  
49 explored the manifestations of Hepatitis B stigma in Ghana. One manifestation was avoidance.  
50 This is consistent with other studies.<sup>55 57</sup> For example, in a study conducted in Japan with a  
51 sample of the working population, Eguchi and Wada<sup>55</sup> found that 32.1% of their study  
52 participants avoided physical contact with colleagues after learning their HBV positive status.  
53 Similarly, in an Iranian study, patients with Hepatitis B reported believing that saliva is a source  
54 of Hepatitis B infection and therefore avoiding bodily contact with close relations including  
55 kissing.<sup>59</sup>

1  
2  
3 In our study, we also found that stigma manifests as social isolation. Our finding that students  
4 were isolated from other students in school dormitories because of their Hepatitis B status is  
5 similar to a finding from a study in China where a university student with Hepatitis B was put  
6 in a single room instead of a shared dormitory.<sup>58</sup> In an study by Yang and Wu<sup>67</sup> the findings  
7 showed that some universities and kindergartens in China refused to admit prospective students  
8 who were Hepatitis B positive.  
9

10  
11  
12 Our study also looked specifically at Hepatitis B stigma in healthcare settings. We ascertained  
13 that stigmatisation took form as excessive cautiousness, procedure postponement or avoidance,  
14 task-shifting, and breaches of confidentiality. Perhaps inadequate knowledge and fear of  
15 acquisition of HBV among the HCPs led to the excessive cautiousness and fear. Currently,  
16 there is no Hepatitis B vaccination policy in place for HCPs in Ghana. HCPs therefore freely  
17 choose to vaccinate against the HBV based on their willingness and financial means to do so  
18 because the vaccination is not free. Our finding that HCP use excessive precautions due to fear  
19 of acquisition of HBV by the HCPs found in this study has been previously documented by Yu  
20 and colleagues<sup>68</sup> in China. Similarly, Wada et al.<sup>38</sup>, in their study conducted in Japan, reported  
21 that some nurses were also reluctant to care for PWHB due to a perceived risk of infection. In  
22 another study conducted in Iran with chronic Hepatitis B patients by Dehkordi and others<sup>39</sup>,  
23 nurses and doctors were reported to be hesitant caring for PWHB after realising they have  
24 Hepatitis B.  
25  
26  
27  
28  
29

30 Our findings have important practical implications. First, the findings provide important insight  
31 on how to go about reducing Hepatitis B stigma. Given the prevalence of incorrect knowledge,  
32 as reflected in the beliefs about Hepatitis B, we recommend public awareness campaigns that  
33 emphasize Hepatitis B transmission routes. Also, given the manifestations of the stigma in the  
34 healthcare settings, we feel that a continuing professional development programme for HCP  
35 on Hepatitis B is called for as this can enhance HCPs knowledge in parallel to public awareness  
36 campaigns. Additionally, we recommend the development and implementation of policy on  
37 HBV vaccination for HCPs that makes this free to HCP, as this may increase HCPs confidence  
38 when caring for PWHB. In developing public awareness campaigns and professional  
39 development program, we consider it important to do this based on both theory and evidence  
40 and in collaboration with target populations, as this improves the likelihood that these  
41 interventions will effectively reduce Hepatitis B stigma in Ghana.<sup>69</sup> In addition, we recommend  
42 providing PWHB with counselling where they can learn to use effective coping strategies when  
43 confronted with stigma. Such coping strategies include seeking social support, affiliating with  
44 others with Hepatitis B, religious coping, and positive reappraisal. These coping strategies have  
45 been shown to build resilience against the negative effects of stigmatization.<sup>19 70</sup> Additionally,  
46 it may be beneficial to explore the possible use or adaptation of existing effective stigma  
47 reduction interventions for PWHB such as psycho-educational interventions that focus on  
48 education, skill building, empowerment, and social support.<sup>71</sup>  
49  
50  
51  
52  
53  
54  
55

56 The findings of this study should be viewed in light of a few limitations. Although this study  
57 provided insights into the beliefs contributing to Hepatitis B stigma and the manifestations of  
58 stigma in Ghana, it did not establish the extent to which these beliefs are endorsed or how often  
59 manifestations of stigma occur. We therefore recommend investigating belief endorsement  
60

1  
2  
3 and the prevalence of stigma manifestations quantitatively in a large representative sample of  
4 the Ghanaian population. Second, given that PWHB participants had lived with the infection  
5 for a period between one and seven years, and were asked to recall their experiences  
6 retrospectively, there was potential for recall bias. We, however, sought to reduce this by  
7 asking follow-up questions to confirm or verify participants' experiences. The third possible  
8 limitation of this study was the exclusion of PWHB who were in the terminal stage of the  
9 disease. We recognise that their experiences with stigma might differ from our study  
10 participants.  
11  
12  
13

## 14 **Conclusion**

15  
16 This study has provided insights about beliefs contributing to Hepatitis B stigma in Ghana and  
17 the manifestations of Hepatitis B stigma, both generally and specifically in healthcare settings.  
18 We found that beliefs that Hepatitis B is highly contagious, very severe, and caused by a curse  
19 are present and contribute to the stigmatisation of PWHB in Ghana. Hepatitis B stigmatisation  
20 manifested as avoidance and social isolation. In the healthcare settings, stigma manifested as  
21 excessive cautiousness, procedure postponement or avoidance, task-shifting, and breaches of  
22 confidentiality. We recommend interventions that seek to alter the beliefs contributing to  
23 Hepatitis B stigma in Ghana, starting with efforts that correct knowledge deficits.  
24  
25  
26  
27

28 **Acknowledgement:** We acknowledge the Ghana Education Trust Fund (GETFUND) for  
29 supporting the First author's PhD programme. We appreciate the support of Mr. Gilbert  
30 Nachinab, Miss Suglo, and Miss Adu-Twumwaa during the period of data collection. We  
31 acknowledge the contribution of the study participants.  
32  
33  
34

## 35 **Abbreviation**

36 HBV- Hepatitis B Virus; PWHB- People with Hepatitis B; HCPs – Healthcare Providers; IDI  
37 – In-depth Interviews; FGD – Focus Group Discussions  
38  
39

## 40 **Funding**

41 No funding  
42  
43

44 **Availability of data and materials:** Participants have consented for anonymised transcripts to  
45 be shared upon request.  
46  
47

48 **Authors Contribution:** CAA conceptualised the study. CAA, SES, RACR, FN designed the  
49 study. Interview guide was designed by CAA and SES. Data analysis was done by CAA and  
50 SES. Manuscript was critically reviewed by SES, FN, RACR. All authors read and approved  
51 the manuscript.  
52  
53

54 **Competing interests:** The authors declare no conflict of interest in this study.

55 **Consent for publication:** Not applicable  
56  
57

## 58 **Ethical Approval**

59  
60

Ethical clearance was obtained from Institutional Review Board of Korle-Bu Teaching Hospital (Approval number KBTH-IRB 00092/2016). Permission was sought from the management of the data collection sites, and informed consent (written) was obtained from the participants.

## References

1. Schweitzer A, Horn J, Mikolajczyk RT, *et al.* Estimations of worldwide prevalence of chronic hepatitis B virus infection: A systematic review of data published between 1965 and 2013. *Lancet* 2015;386:1546–55. doi:10.1016/S0140-6736(15)61412-X
2. WHO. Hepatitis B Fact Sheet. 2018a. [Retrieved from: <http://www.who.int/mediacentre/factsheets/fs204/en/>. Available on February 06, 2018]
3. Ofori-Asenso R, Agyeman AA. Hepatitis B in Ghana: a systematic review & meta-analysis of prevalence studies (1995-2015). *BMC Infect Dis* 2016;16:130. doi:10.1186/s12879-016-1467-5
4. Musa BM, Bussell S, Borodo MM, *et al.* Prevalence of hepatitis B virus infection in Nigeria, 2000-2013: a systematic review and meta-analysis. *Niger J clin Pr* 2015;18:163–72. doi:10.4103/1119-3077.151035
5. Kolou M, Katawa G, Salou M, *et al.* High Prevalence of Hepatitis B Virus Infection in the Age Range of 20-39 Years Old Individuals in Lome. 2015;:1–7. doi:10.2174/1874357901710011001
6. Bigna JJ, Amougou MA, Asangbeh SL, *et al.* Seroprevalence of hepatitis B virus infection in Cameroon : a systematic review and meta-analysis. 2017;:1–12. doi:10.1136/bmjopen-2016-015298
7. Rufai T, Mutocheluh M, Kwarteng K, *et al.* The prevalence of hepatitis B virus E antigen among Ghanaian blood donors. *Pan Afr Med J* 2014;17:53. doi:10.11604/pamj.2014.17.53.3390
8. Mutocheluh M, Owusu M, Kwofie TB, *et al.* Risk factors associated with hepatitis B exposure and the reliability of five rapid kits commonly used for screening blood donors in Ghana. *BMC Res Notes* 2014;7:1–8. doi:10.1186/1756-0500-7-8739.
9. Sagoe KWC, Agyei AA, Ziga F, Lartey M, Adiku TK, Seshi M, Arens MQ, Mingle J A A. Prevalence and Impact of Hepatitis B and C Virus Co-Infections in Antiretroviral Treatment Naive Patients with HIV Infection at a Major Treatment Center in Ghana. *Journal of Medical Virology* 2012; 84: 6-10

10. Adjei AA, Armah HB, Gbagbo F, *et al.* Correlates of HIV, HBV, HCV and syphilis infections among prison inmates and officers in Ghana: A national multicenter study. *BMC Infect Dis* 2008;**8**:1–12. doi:10.1186/1471-2334-8-33
11. Candotti D, Danso K, Allain J-P. Maternofetal transmission of hepatitis B virus genotype E in Ghana, west Africa. *J Gen Virol* 2007;**88**:2686–95. doi:10.1099/vir.0.83102-0
12. Cho Y, Bonsu G, Akoto-Ampaw A, *et al.* The prevalence and risk factors for hepatitis B surface Ag positivity in pregnant women in eastern region of Ghana. *Gut Liver* 2012;**6**:235–40. doi:10.5009/gnl.2012.6.2.235
13. Trépo C, Chan HLY, Lok A. Hepatitis B virus infection. *Lancet* 2014;**6736**:1–11. doi:10.1016/S0140-6736(14)60220-8
14. Giles-Vernick T, Hejoaka F, Sanou A, Shimakawa Y, Bamba I, Traoré A. Barriers to Linkage to Care for Hepatitis B Virus Infection: A Qualitative Analysis in Burkina Faso, West Africa. *Am J Trop Med Hyg* 2016;**95**:1368–75. doi:10.4269/ajtmh.16-0398
15. Lemoine M, Eholié S, Lacombe K. Reducing the neglected burden of viral hepatitis in Africa: Strategies for a global approach. *J Hepatol* 2015;**62**:469–76. doi:10.1016/j.jhep.2014.10.008
16. Nwokediuko SC. Chronic Hepatitis B : Management Challenges in Resource-Poor Coun- tries. 2011;**11**:786–93. doi:10.5812/kowsar.1735143X.757
17. Butt G, Paterson BL, McGuinness LK. Living with the stigma of hepatitis C. *West J Nurs Res* 2008;**30**:204–21. doi:10.1177/0193945907302771
18. Sandelowski, M., Lambe, C., & Barroso, J. (2004). Stigma in HIV-Positive Women. *J Nurs Scholarsh.*, 2004;36 (2):122-8
19. Stutterheim SE, Bos AER, Shiripinda I, *et al.* HIV-related stigma in African and Afro-Caribbean communities in the Netherlands : Manifestations , consequences , and coping. *Psychol Health* 2012;**27**:1–32. doi:10.1080/08870446.2011.585426
20. Colombini M, Mutemwa R, Kivunaga J, *et al.* Experiences of stigma among women living with HIV attending sexual and reproductive health services in Kenya : a qualitative study. 2014:1–9.
21. Courtwright A, Turner NA. Tuberculosis and Stigmatization :Pathways and Interventions. *Public Health Reports* 2010;**125**:34–42.

- 1  
2  
3 22. Miller C, Huston J, Samu L, *et al.* ‘ It makes the patient’s spirit weaker’: tuberculosis  
4 stigma and gender interaction in Dar es Salaam , Tanzania. *Int. J Tuberc Lung Dis*  
5 2017;**21**:42–9.  
6  
7  
8 23. Cotler SJ, Cotler S, Xie H, *et al.* Characterizing hepatitis B stigma in Chinese  
9 immigrants. *J Viral Hepat* 2012;**19**:147–52. doi:10.1111/j.1365-2893.2011.01462.x  
10  
11  
12 24. Ellard, J. & Wallace J. (2013). Stigma and discrimination and hepatitis B: A review  
13 of current research. *ARCSHS Monographs Series*, 93  
14  
15  
16 25. Ng CJ, Low WY, Wong LP, *et al.* Uncovering the experiences and needs of patients  
17 with chronic hepatitis B infection at diagnosis: a qualitative study. *Asia Pac J Public*  
18 *Health* 2013;**25**:32–40. doi:10.1177/1010539511413258  
19  
20  
21 26. Wu H, Yim C, Chan A, *et al.* Sociocultural factors that potentially affect the  
22 institution of prevention and treatment strategies for hepatitis B in Chinese Canadians.  
23 *Can J Gastroenterol* 2009;**23**:31–6.  
24  
25  
26 27. Alizadeh a HM, Ranjbar M, Yadollahzadeh M. Patient concerns regarding chronic  
27 hepatitis B and C infection. 2008;**14**:1142–8.  
28  
29  
30 28. Guirgis M, Nusair F, Bu YM, *et al.* Barriers faced by migrants in accessing healthcare  
31 for viral hepatitis infection. *Intern Med J* 2012;**42**:491–6. doi:10.1111/j.1445-  
32 5994.2011.02647.x  
33  
34  
35 29. WHO. “My untold story”- a hepatitis B patient in Ghana shares his  
36 experience. 2018b. [Retrieved from: [http://www.who.int/hepatitis/news-](http://www.who.int/hepatitis/news-events/ghana-pr-an_untold_story/en/)  
37 [events/ghana-pr-an\\_untold\\_story/en/](http://www.who.int/hepatitis/news-events/ghana-pr-an_untold_story/en/). Available on February 20, 2018]  
38  
39  
40 30. Goffman, E. (1963). Stigma: notes on the management of social spoiled identity.  
41 *Eaglewood Cliffs, NJ@ Prentice-Hall.*  
42  
43  
44 31. Link B, Phelan J. Stigma power. *Soc. Sci. Med.* 2014; 103: 24-  
45 doi:10.1016/j.socscimed.2013.07.035  
46  
47  
48 32. Li D, Tang T, Patterson M, *et al.* The impact of hepatitis B knowledge and stigma on  
49 screening in Canadian Chinese persons. 2012;**26**:597–602.  
50  
51  
52 33. Rafique I, Saqib MAN, Siddiqui S, *et al.* Experiences of stigma among hepatitis B and  
53 C patients in Rawalpindi and Islamabad, Pakistan/Expériences de stigmatisation chez  
54 des patients atteints d’hépatite B et C à Rawalpindi et Islamabad (Pakistan). *East*  
55 *Mediterr Heal J* 2014;**20**:796.  
56  
57  
58  
59  
60



- 1  
2  
3  
4  
5  
6  
7  
8  
9  
10  
11  
12  
13  
14  
15  
16  
17  
18  
19  
20  
21  
22  
23  
24  
25  
26  
27  
28  
29  
30  
31  
32  
33  
34  
35  
36  
37  
38  
39  
40  
41  
42  
43  
44  
45  
46  
47  
48  
49  
50  
51  
52  
53  
54  
55  
56  
57  
58  
59  
60
34. Adjei CA, Naab F, Donkor ES. Beyond the diagnosis: a qualitative exploration of the experiences of persons with hepatitis B in the Accra Metropolis, Ghana. *BMJ Open* 2017;**7**:e017665. doi:10.1136/bmjopen-2017-017665
  35. Yoo GJ, Fang T, Zola J, *et al.* Destigmatizing hepatitis B in the Asian American community: Lessons learned from the San Francisco Hep B free campaign. *J Cancer Educ* 2012;**27**:138–44. doi:10.1007/s13187-011-0252-9
  36. Huang J, Guan ML, Balch J, *et al.* Survey of hepatitis B knowledge and stigma among chronically infected patients and uninfected persons in Beijing, China. *Liver Int* 2016;**36**:1595–603. doi:10.1111/liv.13168
  37. Carabez RM, Swanner JA, Yoo GJ, *et al.* Knowledge and fears among Asian Americans chronically infected with hepatitis B. *J Cancer Educ* 2014;**29**:522–8. doi:10.1007/s13187-013-0585-7
  38. Wada K, Smith DR, Ishimaru T. Reluctance to care for patients with HIV or hepatitis B / C in Japan. *BMC Pregnancy Childbirth* 2016;**16**:1–6. doi:10.1186/s12884-016-0822-2
  39. Dehkordi AH, Mohammadi N, NikbakhatNasrabadi A. Hepatitis-related stigma in chronic patients: A qualitative study. *Appl Nurs Res* 2016;**29**:206–10. doi:10.1016/j.apnr.2015.04.010
  40. Lee H, Fawcett J, Yang JH, *et al.* Correlates of Hepatitis B Virus Health-Related Behaviors of Korean Americans : A Situation-Specific Nursing Theory. 2012;**31**:5–22. doi:10.1111/j.1547-5069.2012.01468.x
  41. Shi J, Chyun D a., Sun Z, *et al.* Assessing the stigma toward chronic carriers of hepatitis B virus: development and validation of a Chinese college students' stigma scale. *J Appl Soc Psychol* 2013;**43**:E46–55. doi:10.1111/jasp.12040
  42. Mohamed R, Ng CJ, Tong WT, *et al.* Knowledge, attitudes and practices among people with chronic hepatitis B attending a hepatology clinic in Malaysia: a cross sectional study. *BMC Public Health* 2012;**12**:601. doi:10.1186/1471-2458-12-601
  43. Wallace J, McNally S, Richmond J, *et al.* Managing chronic hepatitis B: A qualitative study exploring the perspectives of people living with chronic hepatitis B in Australia. *BMC Res Notes* 2011;**4**:45. doi:10.1186/1756-0500-4-45
  44. Spearman CW, Afihene M, Ally R, *et al.* Hepatitis B in sub-Saharan Africa: strategies to achieve the 2030 elimination targets. *Lancet Gastroenterol Hepatol* 2017;**2**:2121. doi:10.1016/S2468-1253(17)30295-9
  45. Labaree RV. Organising your Social sciences Research Paper: Types of Research designs. 2009.[Retrieved from: <http://libguides.usc.edu/writingguide/researchdesigns>. Availabe on January 25, 2018]
  46. Ghana Statistical Service. Ghana Health Service (GHS), and ICF Macro.



- 1  
2  
3 Ghana Demographic and Health Survey 2008, Calverton, Maryland, USA: GSS, GHS,  
4 and Macro International. 2009  
5  
6  
7 47. Ghana Statistical Service. 2010 population projected by sex, 2010-2016. 2016.  
8 Retrieved from: [http://www.statsghana.gov.gh/pop\\_stats.html](http://www.statsghana.gov.gh/pop_stats.html), Accessed on May 24,  
9 2018]
- 10  
11 48. Ministry of Health. Category: Ministry agencies. 2018. [Retrieved from:  
12 <http://www.moh.gov.gh/category/ministry-agencies/>, Accessed on January 01, 2017]
- 13  
14 49. Carter N, Bryant-Lukosius D, DiCenso A, *et al.* The Use of Triangulation in  
15 Qualitative Research. *Oncol Nurs Forum* 2014;**41**:545–7. doi:10.1188/14.ONF.545-  
16 547  
17  
18  
19
- 20 50. Etikan I, Musa SA, Alkassim RS. Comparison of Convenience Sampling and  
21 Purposive Sampling. 2016;**5**:1–4. doi:10.11648/j.ajtas.20160501.1  
22
- 23 51. Palinkas L a, Horwitz SM, Green C a, *et al.* Purposeful Sampling for Qualitative  
24 Data Collection and Analysis in Mixed Method Implementation Research. *Adm Policy*  
25 *Ment Heal* 2015;**42**:533–44. doi:10.1007/s10488-013-0528-y.Purposeful  
26  
27  
28
- 29 52. Polit DF, Beck CT. Nursing research: Principles and methods (8<sup>TH</sup>  
30 Edition). 2014. Lippincot William & Wilkins.  
31
- 32 53. Wellings K, Branigan P, Mitchell K. Discomfort, discord and discontinuity as data:  
33 Using focus groups to research sensitive topics. *Cult Heal Sex* 2000;**2**:255–67.  
34 doi:10.1080/136910500422241  
35
- 36 54. Valizadeh L, Zamanzadeh V, Bayani M, Zabihi A. The Social Stigma Experience in  
37 Patients With Hepatitis B Infection. *Gastroenterol Nurs* [Internet]. 2017;**40**(2):143–  
38 50. Available from: [http://insights.ovid.com/crossref?an=00001610-201703000-](http://insights.ovid.com/crossref?an=00001610-201703000-00009)  
39 00009  
40  
41
- 42 55. Vaismoradi M, Turunen H, Bondas T. Content analysis and thematic analysis:  
43 Implications for conducting a qualitative descriptive study. *Nurs Heal Sci*.  
44 2013;**15**(3):398–405.  
45  
46  
47
- 48 56. Eguchi H, Wada K. Knowledge of HBV and HCV and Individuals' Attitudes  
49 Toward HBV- and HCV-Infected Colleagues: A National Cross-Sectional Study  
50 among a Working Population in Japan. *PLoS One* 2013;**8**:1–7.  
51 doi:10.1371/journal.pone.0076921  
52
- 53 57. Dahl TFM, Cowie BC, Biggs B, *et al.* Health literacy in patients with chronic hepatitis  
54 B attending a tertiary hospital in Melbourne : a questionnaire based survey. 2014;:1–9.  
55
- 56 58. Dam L, Cheng A, Tran P, *et al.* Hepatitis B stigma and knowledge among  
57 Vietnamese in Ho Chi Minh City and Chicago. *Can J Gastroenterol Hepatol*  
58 2016;**2016**. doi:10.1155/2016/1910292  
59  
60

- 1  
2  
3 59. Kan Q, Wen J, Xue R. Discrimination against people with hepatitis B in China. *Lancet* 2015;**386**:245–6. doi:10.1016/S0140-6736(15)61276-4  
4  
5  
6  
7  
8 60. Ochu CL, Beynon CM. Hepatitis B vaccination coverage, knowledge and  
9 sociodemographic determinants of uptake in high risk public safety workers in  
10 Kaduna State, Nigeria: A cross sectional survey. *BMJ Open* 2017;**7**:1–10.  
11 doi:10.1136/bmjopen-2017-015845  
12  
13 61. Schillie S, Vellozzi C, Reingold A, Harris A, Haber P, Ward JW,  
14 Nelson NP. Prevention of hepatitis B virus infection in the United States:  
15 Recommendations of the Advisory Committee on Immunisation Practices. MMWR  
16 Report. 2018. [Retrieved from  
17 <https://www.cdc.gov/mmwr/volumes/67/rr/rr6701a1.htm>. Available on February 20,  
18 2018]  
19  
20  
21 62. Hajarizadeh B, Wallace J, Richmond J, *et al.* Hepatitis B knowledge and  
22 associated  
23 factors among people with chronic hepatitis B. *Aust N Z J Public Health*  
24 2015;**39**:563–8. doi:10.1111/1753-6405.12378  
25  
26  
27 63. Upadhyaya N, Chang R, Davis C, *et al.* Chronic hepatitis B: Perceptions in Asian  
28 American communities and diagnosis and management practices among primary care  
29 physicians. *Postgrad Med* 2010;**122**:165–75. doi:10.3810/pgm.2010.09.2213  
30  
31  
32 64. Hamdiui N, Stein ML, Timen A, Timmermans D, Wong A, van den Muijsenbergh  
33 METC, *et al.* Hepatitis B in Moroccan-Dutch: A quantitative study into determinants  
34 of screening participation. *BMC Med*. 2018;**16**(1):1–6.  
35  
36  
37 65. WHO. Guidelines for the prevention, care and treatment of persons with chronic  
38 hepatitis B infection. 2015;:166.  
39  
40 66. Adjei CA, Atibila F, Apiribu F, Ahordzor F, Attafuah PA, Ansah-Nyarko M,  
41 Asamoah R, and Menkah W. Hepatitis B infection among parturient women in Peri-  
42 Urban Ghana. *American Journal of Tropical Medicine and Hygiene*. 2018;  
43 Doi:10.4269/ajtmh.17-0752.  
44  
45  
46 67. Yang T, Wu MC. Discrimination against hepatitis B carriers in China. *Lancet*  
47 2011;**378**:1059. doi:10.1016/S0140-6736(11)61460-8  
48  
49  
50 68. Yu L, Wang J, Zhu D, *et al.* Hepatitis B-related knowledge and vaccination in  
51 association with discrimination against hepatitis B in rural China. *Hum Vaccines*  
52 *Immunother* 2016;**12**:70–6. doi:10.1080/21645515.2015.1069932  
53  
54  
55 69. Eldredge LKB, Markham CM, Ruiters RAC, Fernández MA, Kok G,  
56 Parcel GS. *Planning Health Promotion Programmes: An Intervention Mapping*  
57 *Approach (4<sup>th</sup> Edition)*. 2016. Jossey-Bass  
58  
59  
60

70. Setlhare V, Wright A, Couper I. The experiences of people living with HIV/AIDS in Gaborone, Botswana: stigma, its consequences and coping mechanisms. *South African Fam Pract* [Internet]. 2014;56(6):309–13. Available from: <http://www.tandfonline.com/doi/abs/10.1080/20786190.2014.975484>

71. Ma PHX, Chan ZCY, Loke AY. Self-Stigma Reduction Interventions for People Living with HIV/AIDS and Their Families: A Systematic Review [Internet]. *AIDS and Behavior*. Springer US; 2018. Available from: <https://doi.org/10.1007/s10461-018-2304-1>

**Table 1: Summary of themes and sub-themes**

| Themes                       | Sub-themes                                            |
|------------------------------|-------------------------------------------------------|
| Beliefs About Hepatitis B    | Hepatitis B as highly contagious                      |
|                              | Hepatitis B as very severe                            |
|                              | Hepatitis B as a curse                                |
| Manifestations of HBV Stigma | Avoidance                                             |
|                              | Social isolation                                      |
|                              | Excessive cautiousness by HCPs                        |
|                              | Procedure postponement or avoidance and task-shifting |
|                              | Breaches of confidentiality                           |

**Table 2: Socio-demographic data of participants with chronic Hepatitis B**

| Pseudonyms | Occupation | Year of diagnosis | Means of diagnosis                   |
|------------|------------|-------------------|--------------------------------------|
| PWHB 1     | Nursing    | 2014              | Self- initiated                      |
| PWHB 2     | Teacher    | 2011              | Hospital protocol for pregnant women |

|         |               |      |                                      |
|---------|---------------|------|--------------------------------------|
| PWHB 3  | Caterer       | 2013 | Hospital protocol for pregnant women |
| PWHB 4  | Student       | 2016 | Physician initiated                  |
| PWHB 5  | Sales Manager | 2016 | Hospital protocol for pregnant women |
| PWHB 6  | Trader        | 2012 | Hospital protocol for pregnant women |
| PWHB 7  | Unemployed    | 2015 | Self-initiated                       |
| PWHB 8  | Trader        | 2012 | Outreach screening programme         |
| PWHB 9  | Unemployed    | 2016 | Outreach screening programme         |
| PWHB 10 | Banker        | 2008 | Outreach screening programme         |
| PWHB 11 | Unemployed    | 2010 | Outreach screening programme         |
| PWHB 12 | Teacher       | 2015 | Self-initiated                       |
| PWHB 13 | Unemployed    | 2011 | Hospital protocol for pregnant women |
| PWHB 14 | Housewife     | 2014 | Outreach screening programme         |
| PWHB 15 | Trader        | 2009 | Self-initiated                       |
| PWHB 16 | Teacher       | 2010 | Self-initiated                       |
| PWHB 17 | Trader        | 2013 | Hospital protocol for pregnant women |
| PWHB 18 | Accountant    | 2015 | Self-initiated                       |

**Table 3: Socio-Demographic Data of Healthcare Providers**

| Pseudonyms | Occupation | Years of practice | Pseudonyms | Occupation | Years of practice |
|------------|------------|-------------------|------------|------------|-------------------|
| HCP 1      | Physician  | 4                 | FGD 1      | Nurse      | 10                |
| HCP 2      | Nurse      | 7                 | FGD 2      | Nurse      | 3                 |
| HCP 3      | Nurse      | 9                 | FGD 3      | Nurse      | 5                 |
| HCP 4      | Physicians | 3                 | FGD 4      | Nurse      | 9                 |
| HCP 5      | Nurse      | 2                 | FGD 5      | Nurse      | 11                |
| HCP 6      | Nurse      | 4                 | FGD 6      | Nurse      | 3                 |
| HCP 7      | Physicians | 5                 | FGD 7      | Nurse      | 4                 |
| HCP 8      | Nurse      | 5                 | FGD 8      | Nurse      | 20                |
| HCP 9      | Physician  | 3                 | FGD 9      | Nurse      | 9                 |
| HCP 10     | Nurse      | 9                 | FGD 10     | Nurse      | 3                 |

|        |           |    |        |         |    |
|--------|-----------|----|--------|---------|----|
| HCP 11 | Nurse     | 3  | FGD 11 | Nurse   | 11 |
| HCP 12 | Physician | 14 | FGD 12 | Nurse   | 6  |
| HCP 13 | Physician | 4  | FGD 13 | Midwife | 8  |
| HCP 14 | Physician | 4  | FGD 14 | Nurse   | 4  |
| HCP 15 | Physician | 9  | FGD 15 | Midwife | 9  |
|        |           |    | FGD 16 | Nurse   | 4  |
|        |           |    | FGD 17 | Nurse   | 7  |
|        |           |    | FGD 18 | Nurse   | 2  |
|        |           |    | FGD 19 | Nurse   | 7  |
|        |           |    | FGD 20 | Nurse   | 4  |
|        |           |    | FGD 21 | Nurse   | 2  |
|        |           |    | FGD 22 | Midwife | 7  |
|        |           |    | FGD 23 | Nurse   | 8  |
|        |           |    | FGD 24 | Nurse   | 20 |
|        |           |    | FGD 25 | Nurse   | 5  |
|        |           |    | FGD 26 | Nurse   | 3  |
|        |           |    | FGD 27 | Midwife | 11 |
|        |           |    | FGD 28 | Nurse   | 8  |
|        |           |    | FGD 29 | Nurse   | 1  |
|        |           |    | FGD 30 | Midwife | 14 |
|        |           |    | FGD 31 | Nurse   | 4  |
|        |           |    | FGD 32 | Nurse   | 3  |

1  
2  
3  
4  
5  
6  
7  
8  
9  
10  
11  
12  
13  
14  
15  
16  
17  
18  
19  
20  
21  
22  
23  
24  
25  
26  
27  
28  
29  
30  
31  
32  
33  
34  
35  
36  
37  
38  
39  
40  
41  
42  
43  
44  
45  
46  
47  
48  
49  
50  
51  
52  
53  
54  
55  
56  
57  
58  
59  
60

For peer review only

## Supplementary material 1: Interview Guide

### PROTOCOL 1: HEPATITIS B RELATED STIGMA AND COPING INTERVIEW WITH PEOPLE WITH HEPATITIS B

#### 1. Introduction

- Welcome the interviewee and appreciate their time for the session.
- Explain what the study is about.
- Explain what the interview involves including the specific topics to be discussed.
- Inform the interviewee about confidentiality.
- Tell the interviewee that the discussion will be recorded and explain the rationale.
- Discuss voluntary participation- emphasize on their right to stop at any time without consequences.
- Give interviewee opportunity to ask questions including concerns.
- Signing of informed consent form by participant.
- Switch on audio-recorder.

#### 2. Background Information

- ✓ Age
- ✓ Gender
- ✓ Marital Status
- ✓ Occupation
- ✓ Year first diagnosed with HBV infection
- ✓ How participant got tested (self-request, general screening exercise, recommendation by physician, employment requirement, pre-marital requirement etc.)

#### 3. Experience of Stigma and Its Manifestations

- a. Have you been treated differently because you have hepatitis B?
- b. If yes, can you share with me about a situation in which you were treated differently (stigma), or discriminated against because of your HBV positive status? Probe
- c. Where were you treated differently? **Probe**
- d. How often have you experienced this including negative reaction?
- e. What do you think causes people to treat you differently? **Probe**
- f. What do you think society perceive people with hepatitis B as? **Probe**
- g. How did these experiences affect you? **Probe**

### PROTOCOL 2: INTERVIEW OF HEALTHCARE PROVIDERS

1. Have you attended to someone with hepatitis B infection before?
2. If yes, can you share your experience/reaction with me? **Probe**
3. What do society perceive hepatitis B as? **Probe**



1  
2  
3 4. What do people perceive individuals with hepatitis B infection as? **Probe**  
4  
5  
6  
7  
8  
9  
10  
11  
12  
13  
14  
15  
16  
17  
18  
19  
20  
21  
22  
23  
24  
25  
26  
27  
28  
29  
30  
31  
32  
33  
34  
35  
36  
37  
38  
39  
40  
41  
42  
43  
44  
45  
46  
47  
48  
49  
50  
51  
52  
53  
54  
55  
56  
57  
58  
59  
60

For peer review only

## COREQ (CONsolidated criteria for REporting Qualitative research) Checklist

A checklist of items that should be included in reports of qualitative research. You must report the page number in your manuscript where you consider each of the items listed in this checklist. If you have not included this information, either revise your manuscript accordingly before submitting or note N/A.

| Topic                                          | Item No. | Guide Questions/Description                                                                                                                              | Reported on Page No. |
|------------------------------------------------|----------|----------------------------------------------------------------------------------------------------------------------------------------------------------|----------------------|
| <b>Domain 1: Research team and reflexivity</b> |          |                                                                                                                                                          |                      |
| <i>Personal characteristics</i>                |          |                                                                                                                                                          |                      |
| Interviewer/facilitator                        | 1        | Which author/s conducted the interview or focus group?                                                                                                   |                      |
| Credentials                                    | 2        | What were the researcher's credentials? E.g. PhD, MD                                                                                                     |                      |
| Occupation                                     | 3        | What was their occupation at the time of the study?                                                                                                      |                      |
| Gender                                         | 4        | Was the researcher male or female?                                                                                                                       |                      |
| Experience and training                        | 5        | What experience or training did the researcher have?                                                                                                     |                      |
| <i>Relationship with participants</i>          |          |                                                                                                                                                          |                      |
| Relationship established                       | 6        | Was a relationship established prior to study commencement?                                                                                              |                      |
| Participant knowledge of the interviewer       | 7        | What did the participants know about the researcher? e.g. personal goals, reasons for doing the research                                                 |                      |
| Interviewer characteristics                    | 8        | What characteristics were reported about the interviewer/facilitator? e.g. Bias, assumptions, reasons and interests in the research topic                |                      |
| <b>Domain 2: Study design</b>                  |          |                                                                                                                                                          |                      |
| <i>Theoretical framework</i>                   |          |                                                                                                                                                          |                      |
| Methodological orientation and Theory          | 9        | What methodological orientation was stated to underpin the study? e.g. grounded theory, discourse analysis, ethnography, phenomenology, content analysis |                      |
| <i>Participant selection</i>                   |          |                                                                                                                                                          |                      |
| Sampling                                       | 10       | How were participants selected? e.g. purposive, convenience, consecutive, snowball                                                                       |                      |
| Method of approach                             | 11       | How were participants approached? e.g. face-to-face, telephone, mail, email                                                                              |                      |
| Sample size                                    | 12       | How many participants were in the study?                                                                                                                 |                      |
| Non-participation                              | 13       | How many people refused to participate or dropped out? Reasons?                                                                                          |                      |
| <i>Setting</i>                                 |          |                                                                                                                                                          |                      |
| Setting of data collection                     | 14       | Where was the data collected? e.g. home, clinic, workplace                                                                                               |                      |
| Presence of non-participants                   | 15       | Was anyone else present besides the participants and researchers?                                                                                        |                      |
| Description of sample                          | 16       | What are the important characteristics of the sample? e.g. demographic data, date                                                                        |                      |
| <i>Data collection</i>                         |          |                                                                                                                                                          |                      |
| Interview guide                                | 17       | Were questions, prompts, guides provided by the authors? Was it pilot tested?                                                                            |                      |
| Repeat interviews                              | 18       | Were repeat interviews carried out? If yes, how many?                                                                                                    |                      |
| Audio/visual recording                         | 19       | Did the research use audio or visual recording to collect the data?                                                                                      |                      |
| Field notes                                    | 20       | Were field notes made during and/or after the interview or focus group?                                                                                  |                      |
| Duration                                       | 21       | What was the duration of the interviews or focus group?                                                                                                  |                      |
| Data saturation                                | 22       | Was data saturation discussed?                                                                                                                           |                      |
| Transcripts returned                           | 23       | Were transcripts returned to participants for comment and/or                                                                                             |                      |

| Topic                                  | Item No. | Guide Questions/Description                                                                                                        | Reported on Page No. |
|----------------------------------------|----------|------------------------------------------------------------------------------------------------------------------------------------|----------------------|
|                                        |          | correction?                                                                                                                        |                      |
| <b>Domain 3: analysis and findings</b> |          |                                                                                                                                    |                      |
| <i>Data analysis</i>                   |          |                                                                                                                                    |                      |
| Number of data coders                  | 24       | How many data coders coded the data?                                                                                               |                      |
| Description of the coding tree         | 25       | Did authors provide a description of the coding tree?                                                                              |                      |
| Derivation of themes                   | 26       | Were themes identified in advance or derived from the data?                                                                        |                      |
| Software                               | 27       | What software, if applicable, was used to manage the data?                                                                         |                      |
| Participant checking                   | 28       | Did participants provide feedback on the findings?                                                                                 |                      |
| <i>Reporting</i>                       |          |                                                                                                                                    |                      |
| Quotations presented                   | 29       | Were participant quotations presented to illustrate the themes/findings?<br>Was each quotation identified? e.g. participant number |                      |
| Data and findings consistent           | 30       | Was there consistency between the data presented and the findings?                                                                 |                      |
| Clarity of major themes                | 31       | Were major themes clearly presented in the findings?                                                                               |                      |
| Clarity of minor themes                | 32       | Is there a description of diverse cases or discussion of minor themes?                                                             |                      |

Developed from: Tong A, Sainsbury P, Craig J. Consolidated criteria for reporting qualitative research (COREQ): a 32-item checklist for interviews and focus groups. *International Journal for Quality in Health Care*. 2007. Volume 19, Number 6: pp. 349 – 357

**Once you have completed this checklist, please save a copy and upload it as part of your submission. DO NOT include this checklist as part of the main manuscript document. It must be uploaded as a separate file.**

# BMJ Open

## Chronic Hepatitis B stigma in Ghana: a qualitative study with patients and providers

|                                 |                                                                                                                                                                                                                                                                                      |
|---------------------------------|--------------------------------------------------------------------------------------------------------------------------------------------------------------------------------------------------------------------------------------------------------------------------------------|
| Journal:                        | <i>BMJ Open</i>                                                                                                                                                                                                                                                                      |
| Manuscript ID                   | bmjopen-2018-025503.R3                                                                                                                                                                                                                                                               |
| Article Type:                   | Research                                                                                                                                                                                                                                                                             |
| Date Submitted by the Author:   | 17-May-2019                                                                                                                                                                                                                                                                          |
| Complete List of Authors:       | Adjei, Charles; University of Ghana, Community Health Nursing Department<br>Stutterheim, Sarah; Maastricht University, Department of Work and Social Psychology<br>Naab, Florence; University of Ghana, Department of Maternal and Child Health<br>Ruiter, R; Maastricht University, |
| <b>Primary Subject Heading</b>: | Gastroenterology and hepatology                                                                                                                                                                                                                                                      |
| Secondary Subject Heading:      | Gastroenterology and hepatology, Infectious diseases, Public health                                                                                                                                                                                                                  |
| Keywords:                       | Hepatitis B, Ghana, Qualitative study, Belief, Stigma                                                                                                                                                                                                                                |
|                                 |                                                                                                                                                                                                                                                                                      |

SCHOLARONE™  
Manuscripts

## Chronic Hepatitis B stigma in Ghana: a qualitative study with patients and providers

Charles Ampong Adjei - **Corresponding Author**  
(PhD student, Maastricht University, The Netherlands)  
Department of Community Health Nursing  
School of Nursing and Midwifery  
College of Health Sciences  
University of Ghana  
chadjei@ug.edu.gh

Dr. Sarah E. Stutterheim  
Department of Work and Social Psychology  
Maastricht University, The Netherlands  
Email: s.stutterheim@maastrichtuniversity.nl

Dr. Florence Naab  
Department of Maternal and Child Health  
School of Nursing and Midwifery  
College of health Sciences  
University of Ghana  
fnaab@ug.edu.gh

Prof. Dr. Robert A.C. Ruiter  
Department of Work and Social Psychology  
Maastricht University, The Netherlands  
Email: r.ruiter@maastrichtuniversity.nl

### ABSTRACT

**Objective:** This study explored beliefs contributing to Hepatitis B stigma, and the ways in which Hepatitis B stigma manifests, from the perspectives of people with chronic Hepatitis B as well as healthcare providers in Northern and Southern Ghana.

**Design:** We used an exploratory qualitative design with a purposive sampling technique. Face-to-face interviews and focus group discussions were conducted. Data were processed using QSR Nvivo version 10.0 and analysed using inductive thematic analysis.

**Settings:** Participants were recruited from one tertiary and one regional hospital in Ghana between February and November, 2017.

**Participants:** Overall, 18 people with chronic Hepatitis B and 47 healthcare providers (primary care physicians, nurses, and midwives) between the ages of 21 and 57 years participated in the study.

**Results:** People with chronic Hepatitis B face stigma in their socio-cultural context and the healthcare environment. Three main beliefs underlying stigma were found: (1) the belief that Hepatitis B is highly contagious; (2) the belief that Hepatitis B is very severe; and (3) the belief that Hepatitis B is caused by curses. Stigmatisation manifested as avoidance and social

isolation (discrimination). In healthcare settings, stigmatisation manifested as excessive cautiousness, procedure postponement or avoidance, task-shifting, and breaches of confidentiality.

**Conclusions:** Given the prevalence of incorrect knowledge, as reflected in the beliefs about Hepatitis B, we recommend public awareness campaigns that emphasise Hepatitis B transmission routes. Also, given the manifestations of the stigma in healthcare settings, we recommend the development and implementation of a continuing professional development programme on Hepatitis B and adjusted policy on Hepatitis B vaccination for HCPs.

**Key words:** Hepatitis B, Ghana, stigma, beliefs.

#### Strengths and limitations of this study

- This study is the first to document Hepatitis B stigma in Ghana.
- Triangulation of the data across settings as well as the inclusion of people with chronic Hepatitis B (PWHB) and healthcare providers (primary physicians, nurses, and midwives) assisted in understanding and describing the phenomenon, and further ensured the trustworthiness of the findings.
- Although this study provided insight into the beliefs contributing to Hepatitis B stigma and the manifestations of stigma in Ghana, we recommend confirming these results quantitatively in a large representative sample of the Ghanaian population.
- We recognise the possibility of recall bias since the PWHB had lived with the disease for a period between 1 and 7 years.

## INTRODUCTION

Hepatitis B viral (HBV) infection remains a public health challenge affecting approximately 248 million people worldwide.<sup>1</sup> Globally, about 887,000 deaths attributable to complications of Hepatitis B (i.e. hepatocellular carcinoma and cirrhosis) were recorded in 2015.<sup>2</sup> Sub-Saharan Africa is disproportionately affected<sup>2</sup> as evidenced by the high HBV prevalence in the region.<sup>3-6</sup>

Within the Ghanaian context, several studies have estimated Hepatitis B prevalence above 8%.<sup>3</sup><sup>7-12</sup> In fact, the most recent prevalence estimate of Hepatitis B in Ghana is 12.3%.<sup>3</sup> HBV transmission occurs through several means.<sup>1</sup><sup>13</sup> In high endemic countries such as Ghana, Hepatitis B is predominantly transmitted perinatally.<sup>13</sup> Other practices, including but not limited to, unsafe injections, blood transfusions, dialysis, needle stick injuries, intimate sexual contact, and non-sexual contact are postulated as a vehicle for HBV transmission.<sup>13</sup> Perhaps, challenges such as the high cost of testing and treatment, poor referral systems, a lack of HBV management guidelines, and inadequate infrastructure for screening contribute to the high prevalence of Hepatitis B in developing countries, including Ghana.<sup>14-16</sup>

1  
2  
3 Generally, conditions with some risk of transmission are associated with stigma.<sup>17 18</sup> This is  
4 well reported for conditions such as Tuberculosis and HIV.<sup>19-22</sup> Similarly, people with chronic  
5 Hepatitis B (PWHB) are likely to be stigmatised.<sup>23-29</sup> Goffman,<sup>30</sup> in his seminal work, described  
6 stigmatisation as a socially and culturally constituted process whereby a person is first labelled  
7 as different and then devalued, leading to status loss and discrimination. Link and Phelan<sup>31</sup> also  
8 outlined three main motivations for stigmatisation namely exploitation and domination  
9 (keeping people down), enforcement of social norms (keeping people in), and avoidance of  
10 diseases (keeping people away). Exploitation and domination occur when a group of people  
11 dominate or exploit another by virtue of their wealth, power, and high social status.  
12 Enforcement of social norms centres on written and unwritten rules that people are expected to  
13 follow and those who violate these norms are stigmatized.<sup>31</sup> Because Hepatitis B is an  
14 infectious disease, the third motivation for stigmatisation, disease avoidance, is most likely.  
15 This is supported by evidence from Canada and Pakistan showing that PWHB experience  
16 stigma because of the perceived infectiousness of HBV.<sup>32-33</sup> However, research also supports  
17 the contention that stigmatisation of PWHB may be motivated by a desire to enforce social  
18 norms as Hepatitis B has been reported to be considered the consequence of promiscuous  
19 behaviour.<sup>29 34 35</sup> Further, given that HBV can be transmitted through intimate sexual contact,  
20 the enforcement of social norms as a motivation for stigmatization could be particularly  
21 relevant in Ghana, where the majority of the population are Christians and Muslims who  
22 disapprove of pre-marital sex.<sup>34</sup> In addition, a lack of knowledge about HBV routes of  
23 transmission has been found to also contribute to Hepatitis B stigma in other locales, such as  
24 China.<sup>36</sup>

25  
26  
27  
28  
29  
30  
31  
32  
33  
34 The stigmatisation of PWHB manifests in many ways. Previous studies conducted outside of  
35 Ghana have reported social exclusion, problems with close relations including friends and  
36 families, and loss of employment as some of the ways in which Hepatitis B stigma presents.<sup>33</sup>  
37  
38  
39  
40  
41  
42  
43  
44  
45  
46  
47  
48  
49  
50  
51  
52  
53  
54  
55  
56  
57  
58  
59  
60  
61  
62  
63  
64  
65  
66  
67  
68  
69  
70  
71  
72  
73  
74  
75  
76  
77  
78  
79  
80  
81  
82  
83  
84  
85  
86  
87  
88  
89  
90  
91  
92  
93  
94  
95  
96  
97  
98  
99  
100  
101  
102  
103  
104  
105  
106  
107  
108  
109  
110  
111  
112  
113  
114  
115  
116  
117  
118  
119  
120  
121  
122  
123  
124  
125  
126  
127  
128  
129  
130  
131  
132  
133  
134  
135  
136  
137  
138  
139  
140  
141  
142  
143  
144  
145  
146  
147  
148  
149  
150  
151  
152  
153  
154  
155  
156  
157  
158  
159  
160  
161  
162  
163  
164  
165  
166  
167  
168  
169  
170  
171  
172  
173  
174  
175  
176  
177  
178  
179  
180  
181  
182  
183  
184  
185  
186  
187  
188  
189  
190  
191  
192  
193  
194  
195  
196  
197  
198  
199  
200  
201  
202  
203  
204  
205  
206  
207  
208  
209  
210  
211  
212  
213  
214  
215  
216  
217  
218  
219  
220  
221  
222  
223  
224  
225  
226  
227  
228  
229  
230  
231  
232  
233  
234  
235  
236  
237  
238  
239  
240  
241  
242  
243  
244  
245  
246  
247  
248  
249  
250  
251  
252  
253  
254  
255  
256  
257  
258  
259  
260  
261  
262  
263  
264  
265  
266  
267  
268  
269  
270  
271  
272  
273  
274  
275  
276  
277  
278  
279  
280  
281  
282  
283  
284  
285  
286  
287  
288  
289  
290  
291  
292  
293  
294  
295  
296  
297  
298  
299  
300  
301  
302  
303  
304  
305  
306  
307  
308  
309  
310  
311  
312  
313  
314  
315  
316  
317  
318  
319  
320  
321  
322  
323  
324  
325  
326  
327  
328  
329  
330  
331  
332  
333  
334  
335  
336  
337  
338  
339  
340  
341  
342  
343  
344  
345  
346  
347  
348  
349  
350  
351  
352  
353  
354  
355  
356  
357  
358  
359  
360  
361  
362  
363  
364  
365  
366  
367  
368  
369  
370  
371  
372  
373  
374  
375  
376  
377  
378  
379  
380  
381  
382  
383  
384  
385  
386  
387  
388  
389  
390  
391  
392  
393  
394  
395  
396  
397  
398  
399  
400  
401  
402  
403  
404  
405  
406  
407  
408  
409  
410  
411  
412  
413  
414  
415  
416  
417  
418  
419  
420  
421  
422  
423  
424  
425  
426  
427  
428  
429  
430  
431  
432  
433  
434  
435  
436  
437  
438  
439  
440  
441  
442  
443  
444  
445  
446  
447  
448  
449  
450  
451  
452  
453  
454  
455  
456  
457  
458  
459  
460  
461  
462  
463  
464  
465  
466  
467  
468  
469  
470  
471  
472  
473  
474  
475  
476  
477  
478  
479  
480  
481  
482  
483  
484  
485  
486  
487  
488  
489  
490  
491  
492  
493  
494  
495  
496  
497  
498  
499  
500  
501  
502  
503  
504  
505  
506  
507  
508  
509  
510  
511  
512  
513  
514  
515  
516  
517  
518  
519  
520  
521  
522  
523  
524  
525  
526  
527  
528  
529  
530  
531  
532  
533  
534  
535  
536  
537  
538  
539  
540  
541  
542  
543  
544  
545  
546  
547  
548  
549  
550  
551  
552  
553  
554  
555  
556  
557  
558  
559  
560  
561  
562  
563  
564  
565  
566  
567  
568  
569  
570  
571  
572  
573  
574  
575  
576  
577  
578  
579  
580  
581  
582  
583  
584  
585  
586  
587  
588  
589  
590  
591  
592  
593  
594  
595  
596  
597  
598  
599  
600  
601  
602  
603  
604  
605  
606  
607  
608  
609  
610  
611  
612  
613  
614  
615  
616  
617  
618  
619  
620  
621  
622  
623  
624  
625  
626  
627  
628  
629  
630  
631  
632  
633  
634  
635  
636  
637  
638  
639  
640  
641  
642  
643  
644  
645  
646  
647  
648  
649  
650  
651  
652  
653  
654  
655  
656  
657  
658  
659  
660  
661  
662  
663  
664  
665  
666  
667  
668  
669  
670  
671  
672  
673  
674  
675  
676  
677  
678  
679  
680  
681  
682  
683  
684  
685  
686  
687  
688  
689  
690  
691  
692  
693  
694  
695  
696  
697  
698  
699  
700  
701  
702  
703  
704  
705  
706  
707  
708  
709  
710  
711  
712  
713  
714  
715  
716  
717  
718  
719  
720  
721  
722  
723  
724  
725  
726  
727  
728  
729  
730  
731  
732  
733  
734  
735  
736  
737  
738  
739  
740  
741  
742  
743  
744  
745  
746  
747  
748  
749  
750  
751  
752  
753  
754  
755  
756  
757  
758  
759  
760  
761  
762  
763  
764  
765  
766  
767  
768  
769  
770  
771  
772  
773  
774  
775  
776  
777  
778  
779  
780  
781  
782  
783  
784  
785  
786  
787  
788  
789  
790  
791  
792  
793  
794  
795  
796  
797  
798  
799  
800  
801  
802  
803  
804  
805  
806  
807  
808  
809  
810  
811  
812  
813  
814  
815  
816  
817  
818  
819  
820  
821  
822  
823  
824  
825  
826  
827  
828  
829  
830  
831  
832  
833  
834  
835  
836  
837  
838  
839  
840  
841  
842  
843  
844  
845  
846  
847  
848  
849  
850  
851  
852  
853  
854  
855  
856  
857  
858  
859  
860  
861  
862  
863  
864  
865  
866  
867  
868  
869  
870  
871  
872  
873  
874  
875  
876  
877  
878  
879  
880  
881  
882  
883  
884  
885  
886  
887  
888  
889  
890  
891  
892  
893  
894  
895  
896  
897  
898  
899  
900  
901  
902  
903  
904  
905  
906  
907  
908  
909  
910  
911  
912  
913  
914  
915  
916  
917  
918  
919  
920  
921  
922  
923  
924  
925  
926  
927  
928  
929  
930  
931  
932  
933  
934  
935  
936  
937  
938  
939  
940  
941  
942  
943  
944  
945  
946  
947  
948  
949  
950  
951  
952  
953  
954  
955  
956  
957  
958  
959  
960  
961  
962  
963  
964  
965  
966  
967  
968  
969  
970  
971  
972  
973  
974  
975  
976  
977  
978  
979  
980  
981  
982  
983  
984  
985  
986  
987  
988  
989  
990  
991  
992  
993  
994  
995  
996  
997  
998  
999  
1000

The stigmatisation of PWHB manifests in many ways. Previous studies conducted outside of Ghana have reported social exclusion, problems with close relations including friends and families, and loss of employment as some of the ways in which Hepatitis B stigma presents.<sup>33 35-37</sup> Hepatitis B stigmatisation also occurs across a number of settings and contexts, including healthcare settings.<sup>38 39</sup> For example, Wada and colleagues<sup>38</sup> found that some healthcare providers in Japan were reluctant to care for patients with chronic Hepatitis B due to fear of infection.

The stigmatisation of PWHB has substantial consequences. It has been found to create an environment of secrecy and denial, can lead to depression, and can be a barrier to health care seeking, including screening and treatment.<sup>28 32 39-41</sup> Additionally, fear of being stigmatised, rejected, and discriminated against has been found to motivate PWHB to conceal their positive status from family and friends,<sup>25 39 42 43</sup> and non-disclosure of HBV status can contribute to further infections.<sup>44</sup> Stigmatisation can also deter people at risk for HBV infection from getting tested, obtaining treatment when eligible, and from seeking assistance for risk reduction.<sup>28 32 41</sup>

Given the high prevalence of Hepatitis B in Ghana,<sup>3</sup> and the paucity of evidence on Hepatitis B stigma in Ghana, this study sought to explore beliefs contributing to Hepatitis B stigma, and the ways in which Hepatitis B stigma manifests, from the perspectives of people with chronic Hepatitis B as well healthcare providers in Northern and Southern Ghana. Understanding this



phenomenon is important as it can inform the design of effective Hepatitis B and stigma prevention interventions, as well as Hepatitis B policies in Ghana and beyond.

## **METHODS**

### **Study Design**

An exploratory qualitative design was used to explore the perspectives of PWHB and HCPs on Hepatitis B stigma in Ghana. This design was deemed best suited for this study because there is very limited documented evidence on Hepatitis B stigma in Ghana.<sup>45</sup> Ethical approval was given by the Korle-Bu Institutional Review Board (Approval number KBTH-IRB 00092/2016). This study is part of larger research project focusing on Hepatitis B stigma. In this article, we report only on the findings that pertain to manifestations of stigma and the beliefs that underlie those manifestations.

### **Study Setting**

The study was conducted in two public health facilities in Ghana. Ghana is a tropical country on the West coast of Africa.<sup>46</sup> According to the most recent census, the population of Ghana was about 28, 308, 301 in 2016.<sup>47</sup> There are ten administrative regions in the country. Each of the regions has a regional hospital which serves as a referral centre for the district hospitals. Also, the country has three main teaching hospitals.<sup>48</sup> A special clinic for patients with liver conditions, including Hepatitis B, are run at the tertiary hospitals whereas PWHB are mostly treated as out-patient cases in regional hospitals. One tertiary hospital in the South and one regional hospital in the North were selected for the study. The selection of the study areas was based on the differences in terms of tradition and culture in the selected regions. People from the Northern region tend to uphold to their tradition and culture to a greater extent than people in the South where urbanisation seems to impact the preservation of tradition and culture.

In Ghanaian society, people tend to attach beliefs to the cause of illnesses depending on their religious affiliation. For example, Christians and Muslims recognise God as the one who controls life events and has the power to deliver people from bad situations including illnesses. Similarly, those with traditional beliefs also tend to attribute the cause of unusual events including illness to consequences of a sin against the gods.

### **Study Population**

We recruited PWHB and HCPs including primary physicians, nurses, and midwives in both Northern and Southern Ghana for the purposes of data source triangulation. Ensuring triangulation was imperative to understanding the Hepatitis B stigma comprehensively and to further validating information obtained from the participants.<sup>49</sup> Inclusion of HCPs was deemed appropriate as they play an important role in the provision of care to PWHB. Also, given that stigma is experienced by PWHB in clinical settings, including the perspectives of HCPs was considered important.

## Participant Eligibility

### Inclusion Criteria

PWHB were included in the study if they were (1) 18 years or older, and (2) had tested Hepatitis B surface antigen (HBsAg) positive at least 6 months prior to recruitment. The inclusion criterion for HCPs was (1) having cared for patients with Hepatitis B in a healthcare setting.

### Exclusion Criteria

PWHB who were in the terminal stage of Hepatitis B and had insufficient energy to participate in an interview were excluded. Only one person in the terminal stage was seen in the tertiary hospital. He was not included because he was in a state of dyspnoea (breathlessness). Also, HCPs who had less than three months working experience in a department where services are provided for PWHB were excluded as these HCPs might not have enough experience to discuss their perspectives on Hepatitis B in their role as HCP.

### Sampling Method and Data Collection Procedure

A purposeful sampling technique was employed.<sup>50 51</sup> First, posters with details of the study, including information about the purpose of the study, assurance of the voluntary nature of the study, as well as the procedure for registration, were advertised in the selected health facilities. In addition, PWHB and HCPs were recruited directly through nurses at the health facilities. Among PWHB, 6 were recruited through the advertisement and the remaining 12 were recruited through nurses in the hospitals. Among HCPs, 10 were recruited through advertisement and 37 were recruited through nurses in the hospitals. In total, 16 participants were recruited through the advertisements and 49 through nurses. Two PWHB refused to participate. One cited time constraints as the reason and the other declined to provide a reason. An additional 5 HCPs did not honour the invitation as a result of an emergency call at work or a conflicting schedule with other unplanned (social) events. PWHB participated in semi-structured in-depth interviews. HCPs were either interviewed or participated in a focus group discussion (FGD). The combination of interviews and FGDs for HCP assisted in understanding and describing the phenomenon comprehensively and further ensured the trustworthiness of the findings<sup>52</sup>. In fact, the use of the FGDs for the HCPs stimulated each other's thoughts. However, given the sensitive nature of the topic and the extent to which responses to the study questions could be quite personal for PWHB, PWHB were not recruited for FGDs. Interviews were deemed more appropriate.<sup>53</sup>

The interviews and FGDs were conducted by the first author (CAA) who is a PhD candidate with a background in qualitative research including conducting and analysing interviews and FGDs. He is also fluent in English and the local Ghanaian language (Twi) but all interviews and FGDs were done in English. Two days before the interviews/FGDs, participants were contacted by telephone to remind them of the appointment. The interviews/FGDs were conducted mostly in the homes of participants with chronic Hepatitis B (under trees) and the workplace of HCPs (nurses' stations and physician's consulting rooms). The informed consent form was signed by all participants following an explanation of the purpose of the study and explicit mention of the confidential and voluntary nature of their participation. In addition,

1  
2  
3 permission was sought from participants to record the interviews/FGDs. Field notes were taken  
4 during the interviews and the FGDs.  
5

6  
7 Data were collected between February and November 2017. In total, 18 in-depth interviews  
8 were conducted with PWHB and 15 in-depth interviews with HCPs. Additionally, 4 FGDs with  
9 a composition of 8 HCPs in each group were conducted. The interviews involving PWHB and  
10 HCPs lasted between 45 minutes and 1 hour whereas the FGDs with HCPs lasted  
11 approximately 1 hour and 15 minutes. Data saturation was reached after the interviews of the  
12 14<sup>th</sup> PWHB and 12<sup>th</sup> HCP.<sup>52</sup>  
13  
14  
15

### 16 **Research Instrument**

17 The interviews and FGDs were guided by a semi-structured protocol with the flexibility to  
18 probe. The protocol was developed based on empirical literature on Hepatitis B stigma<sup>54</sup> and  
19 then reviewed by an expert in stigma (SS). Subsequently, the interview protocol was piloted  
20 with two PWHB and two HCPs. Topics explored during the interviews with PWHB included:  
21 (1) participants' experiences with being treated differently because of their HBV sero-positivity  
22 and the settings in which those experiences took place; (2) perceived reasons for being treated  
23 differently; and (3) the impact of those experiences. Topics explored in the interviews and  
24 FGDs with HCPs were: (1) perceptions about Hepatitis B; (2) the extent to which they have  
25 provided care to someone with Hepatitis B; (3) their reactions to PWHB; and (4) possible  
26 reasons for possible negative reactions to PWHB. A detailed interview protocol can be found  
27 in the supplementary material 1.  
28  
29  
30  
31  
32

### 33 **Data Analysis**

34 Data were processed with QSR Nvivo version 10.0 and analysed using inductive thematic  
35 analysis.<sup>55</sup> The first author (CAA) played and listened to the audio recordings and transcribed  
36 verbatim. The first transcribed data was coded by two of the authors (CAA and SS) followed  
37 by discussions on the individual codes, and, later, the categories and themes generated.  
38 Consensus was reached on the codes, and the main themes and sub-themes were documented.  
39 Preliminary findings were checked with two representatives of the study population to ascertain  
40 if the findings were in line with their views and experiences. Two main themes and eight sub-  
41 themes emerged from the data. These are summarised in Table 1.  
42  
43  
44  
45

### 46 **Patient/Public Involvement**

47 Patients and the public were not involved in the development of the research questions, the  
48 design, recruitment, and the conduct of the study. The study results will be shared with the  
49 participants and other relevant stakeholders through various social media handles, and  
50 conferences.  
51  
52  
53  
54  
55  
56  
57  
58  
59  
60

## RESULTS

### Demographic Characteristics

We recruited, in total, 18 PWHB and 47 HCPs, of which 8 were physicians, 34 were nurses, and 5 were midwives. PWHB were between 21 and 57 years of age and the HCPs were between 23 and 49 years of age. PWHB had lived with HBV between 1 and 7 years and had been diagnosed through one of the following means: self-initiated, physician initiated, during outreach screening services, and as a result of hospital protocol for pregnant women. The HCPs had practised medicine, nursing, or midwifery between 1 and 20 years. Detailed socio-demographic data for PWHB and HCPs are presented in Table 2 and Table 3 respectively.

### Beliefs About Hepatitis B

PWHB and HCP reported that, in Ghana, Hepatitis B is considered highly contagious and very severe. Additionally, Hepatitis B is sometimes associated with curses. These themes are described in detail below.

#### Hepatitis B as highly contagious

Participants with Hepatitis B reported that people in their community believe that Hepatitis B can be acquired through casual contact such as handshaking, touching, and eating from the same bowl with someone with Hepatitis B. These perceived modes of transmission were reported to have created fear and panic within the Ghanaian social arena. The situation was further posited to be compounded by the belief that sweat is a medium by which Hepatitis B can be transmitted. One participant with chronic Hepatitis B said the following:

*“It is well known that when someone with Hepatitis B’s sweat touches you, you can also get the disease or when he shares the same eating bowl with you, you can be infected with the virus by his saliva. This information scares many people and therefore as soon as they get to know you have Hepatitis B, they tend to dissociate themselves from you.”* (PWHB, South-IDI 2<sup>1</sup>)

Another participant with chronic Hepatitis B also recounted his experience in school as follows:

*“When we were in school, we knew that the virus could be found in human sweat. With this understanding, when someone meets you lying on his mattress, he becomes very furious because you have the tendency of infecting him with the virus. If you use someone’s spoon or cup and he sees it, that is it, you will have it forever. He will prefer to buy a new one than to use the one used by you to get the virus.”* (PWHB, North-IDI 7)

According to one PWHB, the fear of infection on the part of others is the result of a lack of knowledge,

---

<sup>1</sup> All names have been changed to protect the identity of participants

1  
2  
3  
4  
5  
6  
7  
8  
9  
10  
11  
12  
13  
14  
15  
16  
17  
18  
19  
20  
21  
22  
23  
24  
25  
26  
27  
28  
29  
30  
31  
32  
33  
34  
35  
36  
37  
38  
39  
40  
41  
42  
43  
44  
45  
46  
47  
48  
49  
50  
51  
52  
53  
54  
55  
56  
57  
58  
59  
60

“There is a lot of false information about Hepatitis B in the public domain which puts fear in everyone. Some have the mind-set that you can get the virus from an infected person through a handshake. This makes people alarmed when they know you have the virus.” (PWHB, South-IDI 11)

The belief that Hepatitis B is easily transmitted was also held by HCPs. Some reported that because of this, they have assigned unique names to chronic Hepatitis B positive patients for easy identification and notification. Also, HCPs reported treating PWHB differently because they fear possible infection.

“I am a midwife and in the ward, we have given those with Hepatitis B names. We call them candidates. When we identify you as a candidate, most midwives don’t want to touch such a person. Even we ignore their money because we believe that where she kept the money sweat could get to it and therefore we don’t like it.” (HCP, North-FGD 13)

### Hepatitis B as very severe

Participants indicated that many people think Hepatitis B is not only easily transmitted but also very severe. Hepatitis B was claimed to be a condition with poor prognosis that eventually leads to death. One participant with chronic Hepatitis B shared her view as follows:

“Everyone is afraid of the Hepatitis B virus. Since it is known that it kills, no one wants to have anything to do with people who have it. Many people are aware of HIV but because it is well publicised that Hepatitis B is more deadly than HIV, people are terrified when getting closer to those who are known to have Hepatitis B.” (PWHB, South-IDI 18).

Another HCP said, “People who are aware of Hepatitis B know that it kills. They are very cautious when they hear that someone has Hepatitis B.” (HCP, South-IDI 2).

Along similar lines, participants reported Hepatitis B to be incurable.

“What scares us is the information that Hepatitis B has no cure. It therefore means that is either you die with it or you live with it forever. HIV which is a popular disease seems to be better than Hepatitis B because there are drugs to keep you alive when you get it.” (PWHB, North-IDI 14)

The severity of Hepatitis B was further emphasized by comparisons that were made with HIV, a condition that is also considered to be very severe. Interestingly, Hepatitis B was considered to be more severe than HIV: “People say it is deadly, it kills faster than HIV/AIDS.” (HCP, South-IDI 12)

### **Hepatitis B as a curse**

Another belief held about Hepatitis B by participants is that Hepatitis B affects people who have been cursed for some kind of wrong doing. This was reported to be based on the fact that people in advanced stages of Hepatitis B clinically present with ascites, jaundice, and oedema, and these presentations are linked to punishment from gods in Ghanaian society. According to a number of the participants, people in their community believe that people with swollen abdomens and feet are cursed for not respecting or taking care of their parents.

*“Ascites [enlarged abdomen] and oedema [swollen feet] is one thing that society perceives as caused by curses. Once they see it, they believe that the person has been cursed. The family members don’t want to get closer since they feel that it is happening because of the person’s bad deeds.”* (HCP, North-FGD 16)

Participants spoke of how, in certain circumstances, family members seek alternative treatment for Hepatitis B when they are convinced that the gods are the cause of the complications. They seek spiritual support and this often delays health care seeking. One HCP recounted her experience with her father who had been Hepatitis B positive.

*“My father had Hepatitis B and died. He grew very lean, his stomach bloated and they said it was a curse from the family. He wasn’t taken to the hospital and he was neglected by his siblings. He was moved from one prayer camp to the other, one church to the other, thinking he would be cured but when he was brought back to the house, the infection was worse than before. His eyes were very yellowish and he was very lean.”* (HCP, South-IDI 11)

Furthermore, a report by a HCP revealed some of the rituals that are performed in the healthcare settings before the corpse of a person with chronic Hepatitis B is taken out for a burial. According to the participant, this is done to prevent possible transmission of the disease to the family members of the deceased.

*“Sometimes when they [PWHB] die, the relatives perform some rituals to cleanse themselves before the body is conveyed to the morgue.”* (HCP, North-IDI 6)

### **Manifestations of Stigma**

In addition to reporting common beliefs about Hepatitis B in Ghana, participants also reported a number of ways in which Hepatitis B stigma manifests, in general and specifically in healthcare settings.

### **Avoidance**

One manifestation of Hepatitis B stigma reported by participants was avoidance. A participant with chronic Hepatitis B recounted her experience following diagnosis and disclosure of her status to her close relative.



1  
2  
3  
4  
5  
6  
7  
8  
9  
10  
11  
12  
13  
14  
15  
16  
17  
18  
19  
20  
21  
22  
23  
24  
25  
26  
27  
28  
29  
30  
31  
32  
33  
34  
35  
36  
37  
38  
39  
40  
41  
42  
43  
44  
45  
46  
47  
48  
49  
50  
51  
52  
53  
54  
55  
56  
57  
58  
59  
60

*“As soon as they see that you have Hepatitis B, they start avoiding you; something you pick, they won’t pick; something you have used, they don’t want to get closer to it. At first, I used to do things together with my uncle. Whenever he is eating, I can put my hand in it and eat with him. After I told him that I was Hepatitis B positive, he avoids me completely. Anytime he returns from work he just greets me and enters his room. I don’t see him to chat and joke like the way we used to.” (PWHB, South-IDI 3)*

Another participant with chronic Hepatitis B also, reported avoidance by family as follows:

*“When my household members see me, they change their conversation. When they are chatting and I go to sit down, then they get up. They treat you as if you have shit on yourself. Everyone leaves you with so many excuses.” (PWHB, North-IDI 16)*

Yet another participant with Hepatitis B reported the following:

*“Many people see those with Hepatitis B as sources of infection because they think it can be transmitted through sweat. They are sometimes afraid to go closer to them especially when the person looks jaundiced (yellowish) and the stomach becomes big. Everyone becomes scared and they may treat the person like a leper by distancing themselves from the person.” (PWHB, South-IDI 15)*

Avoidance was also reported to occur in the healthcare settings. One HCP shared how she avoided a colleague after learning she had Hepatitis B.

*“I was working at one sub-district and the staff were friendly and so we were eating together. One day, we were chatting and a colleague said, ‘she is Hepatitis B positive’. From that day, I never ate with them again because I felt uncomfortable. Knowing that the virus can be in the saliva and there could be exchange of saliva while eating from the same bowl, I was afraid of getting the infection so I stopped eating with them.” (HCP, North-FGD 8)*

Some of the avoidance reported was said to be based on speculations. People who were known or suspected to have a sexual relationship with a person with Hepatitis B were also avoided.

*“I was in a community health centre with subordinates who were young nurses. They were eating together, doing everything together and very close until there was a death of a man. It came out that the person died of Hepatitis B and one of the nurses was said to be the girlfriend. After the funeral, the girl was deserted. The eating together could not continue and, in fact, the girl became very worried and miserable because the relationship with her colleagues changed.” (HCP, North-FGD 30)*

Another participant narrated a similar experience as follows:

*“I stayed in a compound house with a certain lady who was befriending someone positive of Hepatitis B. Later, somebody in the yard got to know that the man was Hepatitis B positive and*



1  
2  
3 *the news spread in the yard. Nobody was coming near her veranda because they concluded*  
4 *that once the guy had Hepatitis B then the lady has also gotten it. When they are sitting in the*  
5 *yard and she comes to sit, they all enter their rooms. Nobody was going close to her until she*  
6 *had a quarrel with one of the residents and she was insulted as having Hepatitis B. That was*  
7 *when the lady got to know why everybody was avoiding her.” (HCP, North-FGD 4)*  
8  
9

10  
11 Additionally, participants indicated that family members sometimes distance themselves  
12 because they see distancing themselves as a way of escaping the wrath of the gods, reflecting  
13 again the belief that Hepatitis B can be the result of a curse from the gods.  
14

15  
16 *“People fear to be closer to someone who has been cursed so they withdraw from the person*  
17 *in order not to attract the anger of the gods.” (HCP, North-FGD 27)*  
18  
19

### 20 21 **Social isolation**

22 Participants also reported social isolation as a manifestation of stigma. They reported that, in  
23 some senior high schools where students reside in the dormitories, those with chronic Hepatitis  
24 B are isolated from their peers in an effort to prevent possible transmission of the virus to other  
25 students. One HCP narrated an encounter she had with a man, whose son suffered this treatment  
26 in school, as follows:  
27  
28

29  
30 *“I met one man who was lamenting that his son in a senior high school was ejected from the*  
31 *school dormitory because he tested Hepatitis B positive. The boy has been isolated and now*  
32 *sleeps in the classroom. The school authorities feel that, if they don’t isolate those who are*  
33 *positive, they will end up infecting everybody and more students. Parents are compelled to get*  
34 *houses outside school campus for such students.” (HCP, North-FGD 14)*  
35  
36  
37

38 Participants also indicated that, in some parts of Northern Ghana, people who test Hepatitis B  
39 positive are subsequently confined to their rooms. They are treated as outcasts and have many  
40 social restrictions. Additionally, some PWHB reported having family roles taken from them  
41 and being denied participation in family functions. A participant with chronic Hepatitis B  
42 shared her observations as follows:  
43  
44

45  
46 *“The person is isolated when family members are made aware of his/her Hepatitis B positive*  
47 *status. If they were cooking in one pot, the person ceases to cook with them. They give them*  
48 *their own room and sometimes put the person very far away. They [PWHB] don’t move around*  
49 *and always stay inside mourning their dead when not dead. They only come and throw their*  
50 *food to them to take and eat. They won’t let you feel that you are also normal like them.”*  
51 *(PWHB, North-DI 8)*  
52  
53

54  
55 Similarly, a HCP recounted her experience with a family that nearly ex-communicated their  
56 daughter because of fear of possible transmission of the virus to other relations.  
57  
58  
59  
60

1  
2  
3 *“I had a fourteen-year-old pregnant lady who had Hepatitis B. I counselled her and the mother.*  
4 *When they returned to the house, the father denied the girl opportunity to stay with them to*  
5 *prevent others getting infected. The father thought that people with Hepatitis B are not*  
6 *supposed to eat with anyone and the person must use a separate bowl, cups etc. Based on this,*  
7 *he could not accept the girl in the house for fear of passing on the infection to the entire family.”*  
8  
9 (HCP, North-FGD 21)  
10

11  
12 The social isolation of PWHB was additionally reported to occur in healthcare settings. In this  
13 context, social isolation occurred because, according to participants, people tend to believe, as  
14 reported above, that an infected person can pass the infection to others through sweat. This was  
15 claimed to motivate HCPs actions to separate PWHB from other patients. *“We put them*  
16 *[PWHB] at the extreme corner where no one goes there.”* (HCP, North-IDI 3)  
17  
18

19  
20 Isolation of PWHB was also reported to worsen when PWHB exhibit severe forms of  
21 jaundice.  
22

23  
24 *“Some people feel that when you have Hepatitis B and you look yellowish, it means that the*  
25 *viruses are too many in your blood. At that point, everyone withdraws. When the person dies,*  
26 *they don’t waste time to keep his/her body for proper funeral but quickly bury the person. I*  
27 *have seen a number of cases like that in my village.”* (PWHB, North-IDI 3)  
28  
29

### 30 31 **Stigmatisation in health care settings**

32 Specific manifestations of stigma in health care settings were reported as well. In healthcare  
33 settings, stigma was reported to not only manifest as avoidance and social isolation as outlined  
34 above, but also as excessive cautiousness, task-shifting, procedure postponement and  
35 avoidance, and breaches of confidentiality.  
36  
37

#### 38 39 **Excessive cautiousness**

40 Participants reported that excessive cautiousness was taken by HCPs when providing care to  
41 patients with chronic Hepatitis B. This was evidenced by the use of extreme infection  
42 prevention precautions. In some instances, HCPs stated that they wore extra gloves to prevent  
43 possible acquisition of the virus.  
44  
45

46  
47 *“Anytime I am managing someone with Hepatitis B, I am extra careful. I put on more than one*  
48 *glove and also wash my hands regularly.”* (HCP, South-FGD 20)  
49

50 Another HCP explained how this is related to the belief that Hepatitis B is highly contagious.  
51

52  
53 *“When you get to know that the patient has Hepatitis B infection, the mind-set changes outright.*  
54 *You become very cautious because you are afraid of getting infected.”* (HCP, South-IDI 9)  
55  
56

57 Notwithstanding, some HCPs indicated that their actions were dependent on the kind of  
58 procedure.  
59  
60

1  
2  
3  
4  
5  
6  
7  
8  
9  
10  
11  
12  
13  
14  
15  
16  
17  
18  
19  
20  
21  
22  
23  
24  
25  
26  
27  
28  
29  
30  
31  
32  
33  
34  
35  
36  
37  
38  
39  
40  
41  
42  
43  
44  
45  
46  
47  
48  
49  
50  
51  
52  
53  
54  
55  
56  
57  
58  
59  
60

*“Sometimes it depends on what you are going to do for the person. For instance, when I am going to empty the urine bag, I put on three gloves. But when I am feeding them, I don’t do that because I know I am not coming into contact with anybody’s fluid.”* (HCP, South-FGD 22)

Some HCPs reported that negative perceptions about Hepatitis B compromises, to some extent, the quality of care individuals with chronic Hepatitis B receive.

*“I’ve seen a couple of cases where midwives were very careful not wanting to assist the delivery of Hepatitis B positive woman. Even the baby that was born, they were very sceptical touching her and the mother. The way they handled them and the way they talked about it - “whispering” when they are handing over - sometimes it is very obvious that they are stigmatising the client.”* (HCP, South- IDI 1)

### **Procedure postponement or avoidance and task-shifting**

The majority of the participating HCPs indicated that postponement or avoidance of procedures and task shifting are common when caring for PWHB. This was reported to occur because of the perceived contagiousness of Hepatitis B.

*“When we see them [PWHB] at the critical stage, some vomiting blood and coughing out blood, you will see some nurses postponing procedures because they think that they can be infected.”* (HCP, North-FGD 5)

Another participant reported procedure avoidance:

*“I ever sent a patient to the hospital. The intravenous line infiltrated and the nurses were supposed to change it. I was amazed that no nurse was ready to do it. This nurse will say to the other to go and do it. Another said let’s wait for the doctor and giggled. So I was getting afraid. Is this person having HIV or what that no one seems interested working on him?”* (HCP, North-FGD 23)

Yet another HCP narrated a similar experience with a Hepatitis B positive patient as follows:

*“We had one Hepatitis B case that came in a coma state and if you look at the severity of the condition, most of the staff were not willing to provide any service for the patient. The patient was restless and ended up losing his life after three days. After he died, nobody even wanted to go closer to his dead body because we were afraid that we could be infected.”* (HCP, South-IDI 10)

A number of the participants indicated that, when a patient has Hepatitis B, some HCPs shift their tasks such that student nurses have to perform them. A nurse recounted her experience during her formal clinical training as follows:

*“During our clinical placement, when cases like Hepatitis B are admitted, it was we, the students, that the nurses used to send to go and manage those clients. In fact, they won’t let*

1  
2  
3  
4  
5  
6  
7  
8  
9  
10  
11  
12  
13  
14  
15  
16  
17  
18  
19  
20  
21  
22  
23  
24  
25  
26  
27  
28  
29  
30  
31  
32  
33  
34  
35  
36  
37  
38  
39  
40  
41  
42  
43  
44  
45  
46  
47  
48  
49  
50  
51  
52  
53  
54  
55  
56  
57  
58  
59  
60

*you know the exact condition until you cannot do something. Even that, when one of them is coming to help you, the gloves will be more than five. Even with that, she will still come and stand and say, “hold this place”, “do that”. She will not do it. So, if they begin to do that and you also take the patient’s folder and you see that it is Hepatitis B, then you advise yourself”* (HCP, North - FGD 19)

Similarly, another nurse reported the following experience:

*“During my first clinical attachment as a student nurse, Hepatitis B patients were put in the cubicle or an isolated veranda. Anytime they [nurses] were to attend to them, either during dressing, checking of vital signs, it was student nurses that they ask us to go and do.”* (HCP, North-FGD 10)

### **Breaches of confidentiality**

The final manifestation of stigma reported to occur in healthcare settings was breaches of confidentiality. Participants reported that some HCPs fail to maintain confidentiality. According to participants working in the healthcare sector, it is common to receive information about PWHB from a colleague in the various hospital wards and units.

*“The moment they diagnose somebody Hepatitis B positive, even if it is one single nurse who is on duty, the whole hospital will hear. The nurse will circulate the information until that ward nurses finish and everybody is informed. If the person is pregnant, it will even spread to the antenatal unit and then to maternity ward and every nurse become careful with such a person.”* (HCP, North-FGD 28)

## **DISCUSSION**

This study set out to explore beliefs contributing to Hepatitis B stigma, and the ways in which Hepatitis B stigma manifests, from the perspectives of people with chronic Hepatitis B as well as healthcare providers in Northern and Southern Ghana. Our findings demonstrated that three main beliefs underlie Hepatitis B stigma in Ghana, namely 1) the belief that Hepatitis B is highly contagious; 2) the belief that Hepatitis B is very severe; and c) the belief that Hepatitis B is caused by curses. In healthcare settings, stigmatisation manifested as excessive cautiousness, procedure postponement or avoidance, task-shifting, and breaches of confidentiality.

The belief that Hepatitis B is highly contagious was reported by both PWHB and HCPs as central to stigma in Ghana. Contributing to this perceived contagiousness were beliefs that Hepatitis B can be transmitted through casual contact such as handshaking, touching, and the sharing of eating utensils with people with chronic Hepatitis B and a focus on body fluids, such as sweat, as a source of infection. Stigmatisation originating from a fear of infection is not particular to Ghana, but has been reported in other locations as well.<sup>26 33 42 55 56-59</sup> For example, in Parkistan, Rafique and colleagues<sup>33</sup> indicated that PWHB experienced stigmatising reactions from their families who feared infection and thus refused to share eating and drinking utensils,

1  
2  
3 as well as soap and towels, with relatives living with chronic Hepatitis B. That sweat was  
4 considered to be an important source of HBV transmission leading to avoidance of PWHB has  
5 also previously been documented by a study conducted in Nigeria.<sup>60</sup> However, sweat is not a  
6 vehicle for HBV transmission<sup>61</sup> and this suggests a knowledge deficit regarding Hepatitis B  
7 transmission not only among the general public in Ghana but also among HCPs. This is  
8 particularly disconcerting given that HCPs are considered an important source of Hepatitis B  
9 information by their patients.<sup>62</sup>  
10  
11  
12

13 Our study further showed that the belief that Hepatitis B is very severe is also present in Ghana  
14 and that this belief contributes to stigmatisation. Generally, participants perceived Hepatitis B  
15 as deadly and reported that others think PWHB will inevitably die. The belief that Hepatitis B  
16 is very severe is consistent with a study conducted by Upadhyaya et al.<sup>63</sup> in the United States,  
17 where the role and attitudes of primary care physicians in Hepatitis B diagnosis and treatment  
18 were assessed. The results showed that physicians perceived Hepatitis B as very serious.<sup>63</sup>  
19 Interestingly, in our study, and in previous studies conducted in Ghana<sup>34</sup> and in the  
20 Netherlands,<sup>64</sup> Hepatitis B was associated with, and perceived to be even more severe, than  
21 HIV. It is possible that in the Ghanaian context, this is attributable to the fact that Hepatitis B  
22 is not optimally managed. Unlike HIV, antiretroviral treatment for Hepatitis B is not readily  
23 available and affordable.<sup>16 44</sup> Additionally, the number of specialised clinics that can monitor  
24 and support PWHB is inadequate<sup>34</sup> and the WHO policy on treatment, management, and  
25 support of PWHB in Ghana has not yet been implemented.<sup>65 34</sup> Further, with the exception of  
26 Hepatitis B testing, which is covered by the national health insurance scheme when requested  
27 by physicians, Hepatitis B vaccination is offered at a fee in Ghana. The only national policy on  
28 Hepatitis B prevention in Ghana is the administration of Hepatitis B pentavalent vaccine to  
29 newborn babies at 6, 10, and 14 weeks after birth.<sup>34</sup>  
30  
31  
32  
33  
34  
35  
36

37 Another finding of this study was that, in Ghana, there is a belief that Hepatitis B is caused by  
38 curses. An earlier study showed that people do attach superstitious beliefs to Hepatitis B in  
39 Ghana.<sup>34</sup> Also, a study conducted by Adjei et al.<sup>66</sup> found that 86% ( $n=168$ ) of participants  
40 linked the cause of Hepatitis B to curses. This association is unsurprising given that some  
41 clinical manifestations of Hepatitis B, including swollen abdomen and feet, are analogous to  
42 the perceived outcomes of a curse in Ghanaian culture. In Ghana, people are particularly  
43 cautious about handling items perceived to be cursed as not handling them can help to avoid  
44 possible transfer of the consequences of that curse.  
45  
46  
47

48 In addition to documenting beliefs about Hepatitis B that contribute to stigmatisation, we also  
49 explored the manifestations of Hepatitis B stigma in Ghana. One manifestation was avoidance.  
50 This is consistent with other studies.<sup>55 57</sup> For example, in a study conducted in Japan with a  
51 sample of the working population, Eguchi and Wada<sup>55</sup> found that 32.1% of their study  
52 participants avoided physical contact with colleagues after learning their HBV positive status.  
53 Similarly, in an Iranian study, patients with Hepatitis B reported believing that saliva is a source  
54 of Hepatitis B infection and therefore avoiding bodily contact with close relations including  
55 kissing.<sup>59</sup>  
56  
57  
58  
59  
60



1  
2  
3 In our study, we also found that stigma manifests as social isolation. Our finding that students  
4 were isolated from other students in school dormitories because of their Hepatitis B status is  
5 similar to a finding from a study in China where a university student with Hepatitis B was put  
6 in a single room instead of a shared dormitory.<sup>58</sup> In an study by Yang and Wu<sup>67</sup> the findings  
7 showed that some universities and kindergartens in China refused to admit prospective students  
8 who were Hepatitis B positive.  
9

10  
11  
12 Our study also looked specifically at Hepatitis B stigma in healthcare settings. We ascertained  
13 that stigmatisation took form as excessive cautiousness, procedure postponement or avoidance,  
14 task-shifting, and breaches of confidentiality. Perhaps inadequate knowledge and fear of  
15 acquisition of HBV among the HCPs led to the excessive cautiousness and fear. Currently,  
16 there is no Hepatitis B vaccination policy in place for HCPs in Ghana. HCPs therefore freely  
17 choose to vaccinate against the HBV based on their willingness and financial means to do so  
18 because the vaccination is not free. Our finding that HCP use excessive precautions due to fear  
19 of acquisition of HBV by the HCPs found in this study has been previously documented by Yu  
20 and colleagues<sup>68</sup> in China. Similarly, Wada et al.<sup>38</sup>, in their study conducted in Japan, reported  
21 that some nurses were also reluctant to care for PWHB due to a perceived risk of infection. In  
22 another study conducted in Iran with chronic Hepatitis B patients by Dehkordi and others<sup>39</sup>,  
23 nurses and doctors were reported to be hesitant caring for PWHB after realising they have  
24 Hepatitis B.  
25  
26  
27  
28  
29

30 Our findings have important practical implications. First, the findings provide important insight  
31 on how to go about reducing Hepatitis B stigma. Given the prevalence of incorrect knowledge,  
32 as reflected in the beliefs about Hepatitis B, we recommend public awareness campaigns that  
33 emphasize Hepatitis B transmission routes. Also, given the manifestations of the stigma in the  
34 healthcare settings, we feel that a continuing professional development programme for HCP  
35 on Hepatitis B is called for as this can enhance HCPs knowledge in parallel to public awareness  
36 campaigns. Additionally, we recommend the development and implementation of policy on  
37 HBV vaccination for HCPs that makes this free to HCP, as this may increase HCPs confidence  
38 when caring for PWHB. In developing public awareness campaigns and professional  
39 development program, we consider it important to do this based on both theory and evidence  
40 and in collaboration with target populations, as this improves the likelihood that these  
41 interventions will effectively reduce Hepatitis B stigma in Ghana.<sup>69</sup> In addition, we recommend  
42 providing PWHB with counselling where they can learn to use effective coping strategies when  
43 confronted with stigma. Such coping strategies include seeking social support, affiliating with  
44 others with Hepatitis B, religious coping, and positive reappraisal. These coping strategies have  
45 been shown to build resilience against the negative effects of stigmatization.<sup>19 70</sup> Additionally,  
46 it may be beneficial to explore the possible use or adaptation of existing effective stigma  
47 reduction interventions for PWHB such as psycho-educational interventions that focus on  
48 education, skill building, empowerment, and social support.<sup>71</sup>  
49  
50  
51  
52  
53  
54  
55

56 The findings of this study should be viewed in light of a few limitations. Although this study  
57 provided insights into the beliefs contributing to Hepatitis B stigma and the manifestations of  
58 stigma in Ghana, it did not establish the extent to which these beliefs are endorsed or how often  
59 manifestations of stigma occur. We therefore recommend investigating belief endorsement and  
60

1  
2  
3 the prevalence of stigma manifestations quantitatively in a large representative sample of the  
4 Ghanaian population. Second, given that PWHB participants had lived with the infection for a  
5 period between one and seven years, and were asked to recall their experiences retrospectively,  
6 there was potential for recall bias. We, however, sought to reduce this by asking follow-up  
7 questions to confirm or verify participants' experiences. The third possible limitation of this  
8 study was the exclusion of PWHB who were in the terminal stage of the disease. We recognise  
9 that their experiences with stigma might differ from our study participants. One important  
10 strength of this study is the use of FGDs that allowed the participant's to build on the ideas of  
11 their colleagues which added some details to the data.  
12  
13  
14

## 15 16 **Conclusion**

17  
18 This study has provided insights about beliefs contributing to Hepatitis B stigma in Ghana and  
19 the manifestations of Hepatitis B stigma, both generally and specifically in healthcare settings.  
20 We found that beliefs that Hepatitis B is highly contagious, very severe, and caused by a curse  
21 are present and contribute to the stigmatisation of PWHB in Ghana. Hepatitis B stigmatisation  
22 manifested as avoidance and social isolation. In the healthcare settings, stigma manifested as  
23 excessive cautiousness, procedure postponement or avoidance, task-shifting, and breaches of  
24 confidentiality. We recommend interventions that seek to alter the beliefs contributing to  
25 Hepatitis B stigma in Ghana, starting with efforts that correct knowledge deficits.  
26  
27  
28

29  
30 **Acknowledgement:** We acknowledge the Ghana Education Trust Fund (GETFUND) for  
31 supporting the First author's PhD programme. We appreciate the support of Mr. Gilbert  
32 Nachinab, Miss Suglo, and Miss Adu-Twumwaa during the period of data collection. We  
33 acknowledge the contribution of the study participants.  
34  
35

## 36 **Abbreviation**

37 HBV- Hepatitis B Virus; PWHB- People with Hepatitis B; HCPs – Healthcare Providers; IDI  
38 – In-depth Interviews; FGDs – Focus Group Discussions  
39  
40

## 41 **Funding**

42 No funding  
43  
44

45  
46 **Availability of data and materials:** Participants have consented for anonymised transcripts to  
47 be shared upon request.  
48

49  
50 **Authors Contribution:** CAA conceptualised the study. CAA, SES, RACR, FN designed the  
51 study. Interview guide was designed by CAA and SES. Data analysis was done by CAA and  
52 SES. Manuscript was critically reviewed by SES, FN, RACR. All authors read and approved  
53 the manuscript.  
54  
55

56 **Competing interests:** The authors declare no conflict of interest in this study.

57 **Consent for publication:** Not applicable  
58  
59

## 60 **Ethical Approval**



Ethical clearance was obtained from Institutional Review Board of Korle-Bu Teaching Hospital (Approval number KBTH-IRB 00092/2016). Permission was sought from the management of the data collection sites, and informed consent (written) was obtained from the participants.

## References

1. Schweitzer A, Horn J, Mikolajczyk RT, *et al.* Estimations of worldwide prevalence of chronic hepatitis B virus infection: A systematic review of data published between 1965 and 2013. *Lancet* 2015;386:1546–55. doi:10.1016/S0140-6736(15)61412-X
2. WHO. Hepatitis B Fact Sheet. 2018a. [Retrieved from: <http://www.who.int/mediacentre/factsheets/fs204/en/>. Available on February 06, 2018]
3. Ofori-Asenso R, Agyeman AA. Hepatitis B in Ghana: a systematic review & meta-analysis of prevalence studies (1995-2015). *BMC Infect Dis* 2016;16:130. doi:10.1186/s12879-016-1467-5
4. Musa BM, Bussell S, Borodo MM, *et al.* Prevalence of hepatitis B virus infection in Nigeria, 2000-2013: a systematic review and meta-analysis. *Niger J clin Pr* 2015;18:163–72. doi:10.4103/1119-3077.151035
5. Kolou M, Katawa G, Salou M, *et al.* High Prevalence of Hepatitis B Virus Infection in the Age Range of 20-39 Years Old Individuals in Lome. 2015;:1–7. doi:10.2174/1874357901710011001
6. Bigna JJ, Amougou MA, Asangbeh SL, *et al.* Seroprevalence of hepatitis B virus infection in Cameroon : a systematic review and meta-analysis. 2017;:1–12. doi:10.1136/bmjopen-2016-015298
7. Rufai T, Mutocheluh M, Kwarteng K, *et al.* The prevalence of hepatitis B virus E antigen among Ghanaian blood donors. *Pan Afr Med J* 2014;17:53. doi:10.11604/pamj.2014.17.53.3390
8. Mutocheluh M, Owusu M, Kwofie TB, *et al.* Risk factors associated with hepatitis B exposure and the reliability of five rapid kits commonly used for screening blood donors in Ghana. *BMC Res Notes* 2014;7:1–8. doi:10.1186/1756-0500-7-8739.
9. Sagoe KWC, Agyei AA, Ziga F, Lartey M, Adiku TK, Seshi M, Arens MQ, Mingle J A A. Prevalence and Impact of Hepatitis B and C Virus Co-Infections in Antiretroviral Treatment Naive Patients with HIV Infection at a Major Treatment Center in Ghana. *Journal of Medical Virology* 2012; 84: 6-10

10. Adjei AA, Armah HB, Gbagbo F, *et al.* Correlates of HIV, HBV, HCV and syphilis infections among prison inmates and officers in Ghana: A national multicenter study. *BMC Infect Dis* 2008;**8**:1–12. doi:10.1186/1471-2334-8-33
11. Candotti D, Danso K, Allain J-P. Maternofetal transmission of hepatitis B virus genotype E in Ghana, west Africa. *J Gen Virol* 2007;**88**:2686–95. doi:10.1099/vir.0.83102-0
12. Cho Y, Bonsu G, Akoto-Ampaw A, *et al.* The prevalence and risk factors for hepatitis B surface Ag positivity in pregnant women in eastern region of Ghana. *Gut Liver* 2012;**6**:235–40. doi:10.5009/gnl.2012.6.2.235
13. Trépo C, Chan HLY, Lok A. Hepatitis B virus infection. *Lancet* 2014;**6736**:1–11. doi:10.1016/S0140-6736(14)60220-8
14. Giles-Vernick T, Hejoaka F, Sanou A, Shimakawa Y, Bamba I, Traoré A. Barriers to Linkage to Care for Hepatitis B Virus Infection: A Qualitative Analysis in Burkina Faso, West Africa. *Am J Trop Med Hyg* 2016;**95**:1368–75. doi:10.4269/ajtmh.16-0398
15. Lemoine M, Eholié S, Lacombe K. Reducing the neglected burden of viral hepatitis in Africa: Strategies for a global approach. *J Hepatol* 2015;**62**:469–76. doi:10.1016/j.jhep.2014.10.008
16. Nwokediuko SC. Chronic Hepatitis B : Management Challenges in Resource-Poor Coun- tries. 2011;**11**:786–93. doi:10.5812/kowsar.1735143X.757
17. Butt G, Paterson BL, McGuinness LK. Living with the stigma of hepatitis C. *West J Nurs Res* 2008;**30**:204–21. doi:10.1177/0193945907302771
18. Sandelowski, M., Lambe, C., & Barroso, J. (2004). Stigma in HIV-Positive Women. *J Nurs Scholarsh.*, 2004;36 (2):122-8
19. Stutterheim SE, Bos AER, Shiripinda I, *et al.* HIV-related stigma in African and Afro-Caribbean communities in the Netherlands : Manifestations , consequences , and coping. *Psychol Health* 2012;**27**:1–32. doi:10.1080/08870446.2011.585426
20. Colombini M, Mutemwa R, Kivunaga J, *et al.* Experiences of stigma among women living with HIV attending sexual and reproductive health services in Kenya : a qualitative study. 2014:1–9.
21. Courtwright A, Turner NA. Tuberculosis and Stigmatization :Pathways and Interventions. *Public Health Reports* 2010;**125**:34–42.

- 1  
2  
3 22. Miller C, Huston J, Samu L, *et al.* ‘ It makes the patient’s spirit weaker’: tuberculosis  
4 stigma and gender interaction in Dar es Salaam , Tanzania. *Int. J Tuberc Lung Dis*  
5 2017;**21**:42–9.  
6  
7  
8 23. Cotler SJ, Cotler S, Xie H, *et al.* Characterizing hepatitis B stigma in Chinese  
9 immigrants. *J Viral Hepat* 2012;**19**:147–52. doi:10.1111/j.1365-2893.2011.01462.x  
10  
11  
12 24. Ellard, J. & Wallace J. (2013). Stigma and discrimination and hepatitis B: A review  
13 of current research. *ARCSHS Monographs Series*, 93  
14  
15  
16 25. Ng CJ, Low WY, Wong LP, *et al.* Uncovering the experiences and needs of patients  
17 with chronic hepatitis B infection at diagnosis: a qualitative study. *Asia Pac J Public*  
18 *Health* 2013;**25**:32–40. doi:10.1177/1010539511413258  
19  
20  
21 26. Wu H, Yim C, Chan A, *et al.* Sociocultural factors that potentially affect the  
22 institution of prevention and treatment strategies for hepatitis B in Chinese Canadians.  
23 *Can J Gastroenterol* 2009;**23**:31–6.  
24  
25  
26 27. Alizadeh a HM, Ranjbar M, Yadollahzadeh M. Patient concerns regarding chronic  
27 hepatitis B and C infection. 2008;**14**:1142–8.  
28  
29  
30 28. Guirgis M, Nusair F, Bu YM, *et al.* Barriers faced by migrants in accessing healthcare  
31 for viral hepatitis infection. *Intern Med J* 2012;**42**:491–6. doi:10.1111/j.1445-  
32 5994.2011.02647.x  
33  
34  
35 29. WHO. “My untold story”- a hepatitis B patient in Ghana shares his  
36 experience. 2018b. [Retrieved from: [http://www.who.int/hepatitis/news-](http://www.who.int/hepatitis/news-events/ghana-pr-an_untold_story/en/)  
37 [events/ghana-pr-an\\_untold\\_story/en/](http://www.who.int/hepatitis/news-events/ghana-pr-an_untold_story/en/). Available on February 20, 2018]  
38  
39  
40 30. Goffman, E. (1963). Stigma: notes on the management of social spoiled identity.  
41 *Eaglewood Cliffs, NJ@ Prentice-Hall.*  
42  
43  
44 31. Link B, Phelan J. Stigma power. *Soc. Sci. Med.* 2014; 103: 24-  
45 doi:10.1016/j.socscimed.2013.07.035  
46  
47  
48 32. Li D, Tang T, Patterson M, *et al.* The impact of hepatitis B knowledge and stigma on  
49 screening in Canadian Chinese persons. 2012;**26**:597–602.  
50  
51  
52 33. Rafique I, Saqib MAN, Siddiqui S, *et al.* Experiences of stigma among hepatitis B and  
53 C patients in Rawalpindi and Islamabad, Pakistan/Expériences de stigmatisation chez  
54 des patients atteints d’hépatite B et C à Rawalpindi et Islamabad (Pakistan). *East*  
55 *Mediterr Heal J* 2014;**20**:796.  
56  
57  
58  
59  
60

- 1  
2  
3  
4  
5  
6  
7  
8  
9  
10  
11  
12  
13  
14  
15  
16  
17  
18  
19  
20  
21  
22  
23  
24  
25  
26  
27  
28  
29  
30  
31  
32  
33  
34  
35  
36  
37  
38  
39  
40  
41  
42  
43  
44  
45  
46  
47  
48  
49  
50  
51  
52  
53  
54  
55  
56  
57  
58  
59  
60
34. Adjei CA, Naab F, Donkor ES. Beyond the diagnosis: a qualitative exploration of the experiences of persons with hepatitis B in the Accra Metropolis, Ghana. *BMJ Open* 2017;**7**:e017665. doi:10.1136/bmjopen-2017-017665
35. Yoo GJ, Fang T, Zola J, *et al.* Destigmatizing hepatitis B in the Asian American community: Lessons learned from the San Francisco Hep B free campaign. *J Cancer Educ* 2012;**27**:138–44. doi:10.1007/s13187-011-0252-9
36. Huang J, Guan ML, Balch J, *et al.* Survey of hepatitis B knowledge and stigma among chronically infected patients and uninfected persons in Beijing, China. *Liver Int* 2016;**36**:1595–603. doi:10.1111/liv.13168
37. Carabez RM, Swanner JA, Yoo GJ, *et al.* Knowledge and fears among Asian Americans chronically infected with hepatitis B. *J Cancer Educ* 2014;**29**:522–8. doi:10.1007/s13187-013-0585-7
38. Wada K, Smith DR, Ishimaru T. Reluctance to care for patients with HIV or hepatitis B / C in Japan. *BMC Pregnancy Childbirth* 2016;**16**:1–6. doi:10.1186/s12884-016-0822-2
39. Dehkordi AH, Mohammadi N, NikbakhatNasrabadi A. Hepatitis-related stigma in chronic patients: A qualitative study. *Appl Nurs Res* 2016;**29**:206–10. doi:10.1016/j.apnr.2015.04.010
40. Lee H, Fawcett J, Yang JH, *et al.* Correlates of Hepatitis B Virus Health-Related Behaviors of Korean Americans : A Situation-Specific Nursing Theory. 2012;**31**:5–22. doi:10.1111/j.1547-5069.2012.01468.x
41. Shi J, Chyun D a., Sun Z, *et al.* Assessing the stigma toward chronic carriers of hepatitis B virus: development and validation of a Chinese college students' stigma scale. *J Appl Soc Psychol* 2013;**43**:E46–55. doi:10.1111/jasp.12040
42. Mohamed R, Ng CJ, Tong WT, *et al.* Knowledge, attitudes and practices among people with chronic hepatitis B attending a hepatology clinic in Malaysia: a cross sectional study. *BMC Public Health* 2012;**12**:601. doi:10.1186/1471-2458-12-601
43. Wallace J, McNally S, Richmond J, *et al.* Managing chronic hepatitis B: A qualitative study exploring the perspectives of people living with chronic hepatitis B in Australia. *BMC Res Notes* 2011;**4**:45. doi:10.1186/1756-0500-4-45
44. Spearman CW, Afihene M, Ally R, *et al.* Hepatitis B in sub-Saharan Africa: strategies to achieve the 2030 elimination targets. *Lancet Gastroenterol Hepatol* 2017;**2**:2121. doi:10.1016/S2468-1253(17)30295-9
45. Labaree RV. Organising your Social sciences Research Paper: Types of Research designs. 2009.[Retrieved from: <http://libguides.usc.edu/writingguide/researchdesigns>. Availabe on January 25, 2018]
46. Ghana Statistical Service. Ghana Health Service (GHS), and ICF Macro.

- 1  
2  
3 Ghana Demographic and Health Survey 2008, Calverton, Maryland, USA: GSS, GHS,  
4 and Macro International. 2009  
5  
6  
7 47. Ghana Statistical Service. 2010 population projected by sex, 2010-2016. 2016.  
8 Retrieved from: [http://www.statsghana.gov.gh/pop\\_stats.html](http://www.statsghana.gov.gh/pop_stats.html), Accessed on May 24,  
9 2018]
- 10  
11 48. Ministry of Health. Category: Ministry agencies. 2018. [Retrieved from:  
12 <http://www.moh.gov.gh/category/ministry-agencies/>, Accessed on January 01, 2017]
- 13  
14 49. Carter N, Bryant-Lukosius D, DiCenso A, *et al.* The Use of Triangulation in  
15 Qualitative Research. *Oncol Nurs Forum* 2014;**41**:545–7. doi:10.1188/14.ONF.545-  
16 547
- 17  
18  
19 50. Etikan I, Musa SA, Alkassim RS. Comparison of Convenience Sampling and  
20 Purposive Sampling. 2016;**5**:1–4. doi:10.11648/j.ajtas.20160501.1
- 21  
22 51. Palinkas L a, Horwitz SM, Green C a, *et al.* Purposeful Sampling for Qualitative  
23 Data Collection and Analysis in Mixed Method Implementation Research. *Adm Policy*  
24 *Ment Heal* 2015;**42**:533–44. doi:10.1007/s10488-013-0528-y.Purposeful
- 25  
26  
27 52. Polit DF, Beck CT. Nursing research: Principles and methods (8<sup>TH</sup>  
28 Edition). 2014. Lippincot William & Wilkins.
- 29  
30 53. Wellings K, Branigan P, Mitchell K. Discomfort, discord and discontinuity as data:  
31 Using focus groups to research sensitive topics. *Cult Heal Sex* 2000;**2**:255–67.  
32 doi:10.1080/136910500422241
- 33  
34 54. Valizadeh L, Zamanzadeh V, Bayani M, Zabihi A. The Social Stigma Experience in  
35 Patients With Hepatitis B Infection. *Gastroenterol Nurs* [Internet]. 2017;**40**(2):143–  
36 50. Available from: [http://insights.ovid.com/crossref?an=00001610-201703000-  
37 00009](http://insights.ovid.com/crossref?an=00001610-201703000-00009)
- 38  
39 55. Vaismoradi M, Turunen H, Bondas T. Content analysis and thematic analysis:  
40 Implications for conducting a qualitative descriptive study. *Nurs Heal Sci*.  
41 2013;**15**(3):398–405.
- 42  
43 56. Eguchi H, Wada K. Knowledge of HBV and HCV and Individuals' Attitudes  
44 Toward HBV- and HCV-Infected Colleagues: A National Cross-Sectional Study  
45 among a Working Population in Japan. *PLoS One* 2013;**8**:1–7.  
46 doi:10.1371/journal.pone.0076921
- 47  
48 57. Dahl TFM, Cowie BC, Biggs B, *et al.* Health literacy in patients with chronic hepatitis  
49 B attending a tertiary hospital in Melbourne : a questionnaire based survey. 2014;:1–9.
- 50  
51 58. Dam L, Cheng A, Tran P, *et al.* Hepatitis B stigma and knowledge among  
52 Vietnamese in Ho Chi Minh City and Chicago. *Can J Gastroenterol Hepatol*  
53 2016;**2016**. doi:10.1155/2016/1910292
- 54  
55  
56  
57  
58  
59  
60

- 1  
2  
3 59. Kan Q, Wen J, Xue R. Discrimination against people with hepatitis B in China. *Lancet* 2015;**386**:245–6. doi:10.1016/S0140-6736(15)61276-4  
4  
5  
6  
7  
8 60. Ochu CL, Beynon CM. Hepatitis B vaccination coverage, knowledge and  
9 sociodemographic determinants of uptake in high risk public safety workers in  
10 Kaduna State, Nigeria: A cross sectional survey. *BMJ Open* 2017;**7**:1–10.  
11 doi:10.1136/bmjopen-2017-015845  
12  
13 61. Schillie S, Vellozzi C, Reingold A, Harris A, Haber P, Ward JW,  
14 Nelson NP. Prevention of hepatitis B virus infection in the United States:  
15 Recommendations of the Advisory Committee on Immunisation Practices. MMWR  
16 Report. 2018. [Retrieved from  
17 <https://www.cdc.gov/mmwr/volumes/67/rr/rr6701a1.htm>. Available on February 20,  
18 2018]  
19  
20  
21 62. Hajarizadeh B, Wallace J, Richmond J, *et al*. Hepatitis B knowledge and  
22 associated  
23 factors among people with chronic hepatitis B. *Aust N Z J Public Health*  
24 2015;**39**:563–8. doi:10.1111/1753-6405.12378  
25  
26  
27 63. Upadhyaya N, Chang R, Davis C, *et al*. Chronic hepatitis B: Perceptions in Asian  
28 American communities and diagnosis and management practices among primary care  
29 physicians. *Postgrad Med* 2010;**122**:165–75. doi:10.3810/pgm.2010.09.2213  
30  
31  
32 64. Hamdiui N, Stein ML, Timen A, Timmermans D, Wong A, van den Muijsenbergh  
33 METC, *et al*. Hepatitis B in Moroccan-Dutch: A quantitative study into determinants  
34 of screening participation. *BMC Med*. 2018;**16**(1):1–6.  
35  
36  
37 65. WHO. Guidelines for the prevention, care and treatment of persons with chronic  
38 hepatitis B infection. 2015;:166.  
39  
40 66. Adjei CA, Atibila F, Apiribu F, Ahordzor F, Attafuah PA, Ansah-Nyarko M,  
41 Asamoah R, and Menkah W. Hepatitis B infection among parturient women in Peri-  
42 Urban Ghana. *American Journal of Tropical Medicine and Hygiene*. 2018;  
43 Doi:10.4269/ajtmh.17-0752.  
44  
45  
46 67. Yang T, Wu MC. Discrimination against hepatitis B carriers in China. *Lancet*  
47 2011;**378**:1059. doi:10.1016/S0140-6736(11)61460-8  
48  
49  
50 68. Yu L, Wang J, Zhu D, *et al*. Hepatitis B-related knowledge and vaccination in  
51 association with discrimination against hepatitis B in rural China. *Hum Vaccines*  
52 *Immunother* 2016;**12**:70–6. doi:10.1080/21645515.2015.1069932  
53  
54  
55 69. Eldredge LKB, Markham CM, Ruiters RAC, Fernández MA, Kok G,  
56 Parcel GS. *Planning Health Promotion Programmes: An Intervention Mapping*  
57 *Approach (4<sup>th</sup> Edition)*. 2016. Jossey-Bass  
58  
59  
60



70. Setlhare V, Wright A, Couper I. The experiences of people living with HIV/AIDS in Gaborone, Botswana: stigma, its consequences and coping mechanisms. *South African Fam Pract* [Internet]. 2014;56(6):309–13. Available from: <http://www.tandfonline.com/doi/abs/10.1080/20786190.2014.975484>

71. Ma PHX, Chan ZCY, Loke AY. Self-Stigma Reduction Interventions for People Living with HIV/AIDS and Their Families: A Systematic Review [Internet]. *AIDS and Behavior*. Springer US; 2018. Available from: <https://doi.org/10.1007/s10461-018-2304-1>

**Table 1: Summary of themes and sub-themes**

| Themes                       | Sub-themes                                            |
|------------------------------|-------------------------------------------------------|
| Beliefs About Hepatitis B    | Hepatitis B as highly contagious                      |
|                              | Hepatitis B as very severe                            |
|                              | Hepatitis B as a curse                                |
| Manifestations of HBV Stigma | Avoidance                                             |
|                              | Social isolation                                      |
|                              | Excessive cautiousness by HCPs                        |
|                              | Procedure postponement or avoidance and task-shifting |
|                              | Breaches of confidentiality                           |

**Table 2: Socio-demographic data of participants with chronic Hepatitis B**

| Participant number | Occupation | Year of diagnosis | Means of diagnosis                   |
|--------------------|------------|-------------------|--------------------------------------|
| PWHB 1             | Nursing    | 2014              | Self-initiated                       |
| PWHB 2             | Teacher    | 2011              | Hospital protocol for pregnant women |



|         |               |      |                                      |
|---------|---------------|------|--------------------------------------|
| PWHB 3  | Caterer       | 2013 | Hospital protocol for pregnant women |
| PWHB 4  | Student       | 2016 | Physician initiated                  |
| PWHB 5  | Sales Manager | 2016 | Hospital protocol for pregnant women |
| PWHB 6  | Trader        | 2012 | Hospital protocol for pregnant women |
| PWHB 7  | Unemployed    | 2015 | Self-initiated                       |
| PWHB 8  | Trader        | 2012 | Outreach screening programme         |
| PWHB 9  | Unemployed    | 2016 | Outreach screening programme         |
| PWHB 10 | Banker        | 2008 | Outreach screening programme         |
| PWHB 11 | Unemployed    | 2010 | Outreach screening programme         |
| PWHB 12 | Teacher       | 2015 | Self-initiated                       |
| PWHB 13 | Unemployed    | 2011 | Hospital protocol for pregnant women |
| PWHB 14 | Housewife     | 2014 | Outreach screening programme         |
| PWHB 15 | Trader        | 2009 | Self-initiated                       |
| PWHB 16 | Teacher       | 2010 | Self-initiated                       |
| PWHB 17 | Trader        | 2013 | Hospital protocol for pregnant women |
| PWHB 18 | Accountant    | 2015 | Self-initiated                       |

**Table 3: Socio-Demographic Data of Healthcare Providers**

| Pseudonyms | Occupation | Years of practice | Pseudonyms | Occupation | Years of practice |
|------------|------------|-------------------|------------|------------|-------------------|
| HCP 1      | Physician  | 4                 | FGD 1      | Nurse      | 10                |
| HCP 2      | Nurse      | 7                 | FGD 2      | Nurse      | 3                 |
| HCP 3      | Nurse      | 9                 | FGD 3      | Nurse      | 5                 |
| HCP 4      | Physicians | 3                 | FGD 4      | Nurse      | 9                 |
| HCP 5      | Nurse      | 2                 | FGD 5      | Nurse      | 11                |
| HCP 6      | Nurse      | 4                 | FGD 6      | Nurse      | 3                 |
| HCP 7      | Physicians | 5                 | FGD 7      | Nurse      | 4                 |
| HCP 8      | Nurse      | 5                 | FGD 8      | Nurse      | 20                |
| HCP 9      | Physician  | 3                 | FGD 9      | Nurse      | 9                 |
| HCP 10     | Nurse      | 9                 | FGD 10     | Nurse      | 3                 |

|        |           |    |        |         |    |
|--------|-----------|----|--------|---------|----|
| HCP 11 | Nurse     | 3  | FGD 11 | Nurse   | 11 |
| HCP 12 | Physician | 14 | FGD 12 | Nurse   | 6  |
| HCP 13 | Physician | 4  | FGD 13 | Midwife | 8  |
| HCP 14 | Physician | 4  | FGD 14 | Nurse   | 4  |
| HCP 15 | Physician | 9  | FGD 15 | Midwife | 9  |
|        |           |    | FGD 16 | Nurse   | 4  |
|        |           |    | FGD 17 | Nurse   | 7  |
|        |           |    | FGD 18 | Nurse   | 2  |
|        |           |    | FGD 19 | Nurse   | 7  |
|        |           |    | FGD 20 | Nurse   | 4  |
|        |           |    | FGD 21 | Nurse   | 2  |
|        |           |    | FGD 22 | Midwife | 7  |
|        |           |    | FGD 23 | Nurse   | 8  |
|        |           |    | FGD 24 | Nurse   | 20 |
|        |           |    | FGD 25 | Nurse   | 5  |
|        |           |    | FGD 26 | Nurse   | 3  |
|        |           |    | FGD 27 | Midwife | 11 |
|        |           |    | FGD 28 | Nurse   | 8  |
|        |           |    | FGD 29 | Nurse   | 1  |
|        |           |    | FGD 30 | Midwife | 14 |
|        |           |    | FGD 31 | Nurse   | 4  |
|        |           |    | FGD 32 | Nurse   | 3  |

## Supplementary material 1: Interview Guide

### 1. Background Information

- ✓ Age
- ✓ Gender
- ✓ Marital Status
- ✓ Occupation
- ✓ Year first diagnosed with HBV infection
- ✓ How participant got tested (self-request, general screening exercise, recommendation by physician, employment requirement, pre-marital requirement etc.)

### 2. Experience of Stigma and Its Manifestations

- a. Have you been treated differently because you have hepatitis B?
- b. If yes, can you share with me about a situation in which you were treated differently (stigma), or discriminated against because of your HBV positive status? Probe
- c. Where were you treated differently? **Probe**
- d. How often have you experienced this including negative reaction?
- e. What do you think causes people to treat you differently? **Probe**
- f. What do you think society perceive people with hepatitis B as? **Probe**
- g. How did these experiences affect you? **Probe**

## PROTOCOL 2: INTERVIEW OF HEALTHCARE PROVIDERS

1. Have you attended to someone with hepatitis B infection before?
2. If yes, can you share your experience/reaction with me? **Probe**
3. What do society perceive hepatitis B as? **Probe**
4. What do people perceive individuals with hepatitis B infection as? **Probe**

## COREQ (COnsolidated criteria for REporting Qualitative research) Checklist

A checklist of items that should be included in reports of qualitative research. You must report the page number in your manuscript where you consider each of the items listed in this checklist. If you have not included this information, either revise your manuscript accordingly before submitting or note N/A.

| Topic                                          | Item No. | Guide Questions/Description                                                                                                                              | Reported on Page No. |
|------------------------------------------------|----------|----------------------------------------------------------------------------------------------------------------------------------------------------------|----------------------|
| <b>Domain 1: Research team and reflexivity</b> |          |                                                                                                                                                          |                      |
| <i>Personal characteristics</i>                |          |                                                                                                                                                          |                      |
| Interviewer/facilitator                        | 1        | Which author/s conducted the interview or focus group?                                                                                                   |                      |
| Credentials                                    | 2        | What were the researcher's credentials? E.g. PhD, MD                                                                                                     |                      |
| Occupation                                     | 3        | What was their occupation at the time of the study?                                                                                                      |                      |
| Gender                                         | 4        | Was the researcher male or female?                                                                                                                       |                      |
| Experience and training                        | 5        | What experience or training did the researcher have?                                                                                                     |                      |
| <i>Relationship with participants</i>          |          |                                                                                                                                                          |                      |
| Relationship established                       | 6        | Was a relationship established prior to study commencement?                                                                                              |                      |
| Participant knowledge of the interviewer       | 7        | What did the participants know about the researcher? e.g. personal goals, reasons for doing the research                                                 |                      |
| Interviewer characteristics                    | 8        | What characteristics were reported about the interviewer/facilitator? e.g. Bias, assumptions, reasons and interests in the research topic                |                      |
| <b>Domain 2: Study design</b>                  |          |                                                                                                                                                          |                      |
| <i>Theoretical framework</i>                   |          |                                                                                                                                                          |                      |
| Methodological orientation and Theory          | 9        | What methodological orientation was stated to underpin the study? e.g. grounded theory, discourse analysis, ethnography, phenomenology, content analysis |                      |
| <i>Participant selection</i>                   |          |                                                                                                                                                          |                      |
| Sampling                                       | 10       | How were participants selected? e.g. purposive, convenience, consecutive, snowball                                                                       |                      |
| Method of approach                             | 11       | How were participants approached? e.g. face-to-face, telephone, mail, email                                                                              |                      |
| Sample size                                    | 12       | How many participants were in the study?                                                                                                                 |                      |
| Non-participation                              | 13       | How many people refused to participate or dropped out? Reasons?                                                                                          |                      |
| <i>Setting</i>                                 |          |                                                                                                                                                          |                      |
| Setting of data collection                     | 14       | Where was the data collected? e.g. home, clinic, workplace                                                                                               |                      |
| Presence of non-participants                   | 15       | Was anyone else present besides the participants and researchers?                                                                                        |                      |
| Description of sample                          | 16       | What are the important characteristics of the sample? e.g. demographic data, date                                                                        |                      |
| <i>Data collection</i>                         |          |                                                                                                                                                          |                      |
| Interview guide                                | 17       | Were questions, prompts, guides provided by the authors? Was it pilot tested?                                                                            |                      |
| Repeat interviews                              | 18       | Were repeat interviews carried out? If yes, how many?                                                                                                    |                      |
| Audio/visual recording                         | 19       | Did the research use audio or visual recording to collect the data?                                                                                      |                      |
| Field notes                                    | 20       | Were field notes made during and/or after the interview or focus group?                                                                                  |                      |
| Duration                                       | 21       | What was the duration of the interviews or focus group?                                                                                                  |                      |
| Data saturation                                | 22       | Was data saturation discussed?                                                                                                                           |                      |
| Transcripts returned                           | 23       | Were transcripts returned to participants for comment and/or                                                                                             |                      |

| Topic                                  | Item No. | Guide Questions/Description                                                                                                        | Reported on Page No. |
|----------------------------------------|----------|------------------------------------------------------------------------------------------------------------------------------------|----------------------|
|                                        |          | correction?                                                                                                                        |                      |
| <b>Domain 3: analysis and findings</b> |          |                                                                                                                                    |                      |
| <i>Data analysis</i>                   |          |                                                                                                                                    |                      |
| Number of data coders                  | 24       | How many data coders coded the data?                                                                                               |                      |
| Description of the coding tree         | 25       | Did authors provide a description of the coding tree?                                                                              |                      |
| Derivation of themes                   | 26       | Were themes identified in advance or derived from the data?                                                                        |                      |
| Software                               | 27       | What software, if applicable, was used to manage the data?                                                                         |                      |
| Participant checking                   | 28       | Did participants provide feedback on the findings?                                                                                 |                      |
| <i>Reporting</i>                       |          |                                                                                                                                    |                      |
| Quotations presented                   | 29       | Were participant quotations presented to illustrate the themes/findings?<br>Was each quotation identified? e.g. participant number |                      |
| Data and findings consistent           | 30       | Was there consistency between the data presented and the findings?                                                                 |                      |
| Clarity of major themes                | 31       | Were major themes clearly presented in the findings?                                                                               |                      |
| Clarity of minor themes                | 32       | Is there a description of diverse cases or discussion of minor themes?                                                             |                      |

Developed from: Tong A, Sainsbury P, Craig J. Consolidated criteria for reporting qualitative research (COREQ): a 32-item checklist for interviews and focus groups. *International Journal for Quality in Health Care*. 2007. Volume 19, Number 6: pp. 349 – 357

**Once you have completed this checklist, please save a copy and upload it as part of your submission. DO NOT include this checklist as part of the main manuscript document. It must be uploaded as a separate file.**
