# Supplementary material for: Chronic Hepatitis B stigma in Ghana: a qualitative study with patients and providers
Source: PubMed Central journal article supplement — BMJ Open. 2019 Jun 27;9(6):e025503. doi: 10.1136/bmjopen-2018-025503 (PMC6597648; doi:10.1136/bmjopen-2018-025503), 2019-06-27
Supplement: bmjopen-2018-025503supp001.pdf [file bmjopen-2018-025503supp001.pdf]

**Appendices: Table of innovations and Characterisation of innovations: Society for Family Health Maternal and Newborn Health project, Gombe State**

**Table A1. Project innovations**

| Table A1. Project innovations 2011-2014, by geography.                                                                                                                                                                                                                                                                                                                                                                                                                                                                                                                                                                                                        |                                                                                                                                                                                                                                                                                                             |                                                                                                                                                                                                                                                                                                                                                                                                                                                                                                                        |                                                                                                                                                                                                                                                                                                |                                                                                                                                                                                                                                                                                                                                                                             |                                                                                                                                                |                                                                                                                                                                                                                                                                                           |                                                                                                                                                                                                                                                                                                                                                                                                                                                                          |                                                                                                                                                                                                                                                                                                                                                                                                                                                    |
|---------------------------------------------------------------------------------------------------------------------------------------------------------------------------------------------------------------------------------------------------------------------------------------------------------------------------------------------------------------------------------------------------------------------------------------------------------------------------------------------------------------------------------------------------------------------------------------------------------------------------------------------------------------|-------------------------------------------------------------------------------------------------------------------------------------------------------------------------------------------------------------------------------------------------------------------------------------------------------------|------------------------------------------------------------------------------------------------------------------------------------------------------------------------------------------------------------------------------------------------------------------------------------------------------------------------------------------------------------------------------------------------------------------------------------------------------------------------------------------------------------------------|------------------------------------------------------------------------------------------------------------------------------------------------------------------------------------------------------------------------------------------------------------------------------------------------|-----------------------------------------------------------------------------------------------------------------------------------------------------------------------------------------------------------------------------------------------------------------------------------------------------------------------------------------------------------------------------|------------------------------------------------------------------------------------------------------------------------------------------------|-------------------------------------------------------------------------------------------------------------------------------------------------------------------------------------------------------------------------------------------------------------------------------------------|--------------------------------------------------------------------------------------------------------------------------------------------------------------------------------------------------------------------------------------------------------------------------------------------------------------------------------------------------------------------------------------------------------------------------------------------------------------------------|----------------------------------------------------------------------------------------------------------------------------------------------------------------------------------------------------------------------------------------------------------------------------------------------------------------------------------------------------------------------------------------------------------------------------------------------------|
| Gombe State Nigeria project innovations                                                                                                                                                                                                                                                                                                                                                                                                                                                                                                                                                                                                                       |                                                                                                                                                                                                                                                                                                             | Ethiopia project innovations                                                                                                                                                                                                                                                                                                                                                                                                                                                                                           |                                                                                                                                                                                                                                                                                                |                                                                                                                                                                                                                                                                                                                                                                             | Uttar Pradesh India project innovations                                                                                                        |                                                                                                                                                                                                                                                                                           |                                                                                                                                                                                                                                                                                                                                                                                                                                                                          |                                                                                                                                                                                                                                                                                                                                                                                                                                                    |
| Society for Family Health                                                                                                                                                                                                                                                                                                                                                                                                                                                                                                                                                                                                                                     | PACT                                                                                                                                                                                                                                                                                                        | Last 10 Kilometres                                                                                                                                                                                                                                                                                                                                                                                                                                                                                                     | MaNHEP                                                                                                                                                                                                                                                                                         | SNL COMBINE                                                                                                                                                                                                                                                                                                                                                                 | Better Birth                                                                                                                                   | Manthan                                                                                                                                                                                                                                                                                   | Sure Start                                                                                                                                                                                                                                                                                                                                                                                                                                                               | UP-Community Mobilisation Project                                                                                                                                                                                                                                                                                                                                                                                                                  |
| <ol style="list-style-type: none"> <li>1. Mapping of service users and provision;</li> <li>2. Train and deploy skilled Traditional Birth Attendants</li> <li>3. Train and deploy FOMWAN community volunteers</li> <li>4. Frontline workers' toolkit;</li> <li>5. Financial incentives for frontline workers;</li> <li>6. Call centre;</li> <li>7. Emergency Transport Scheme;</li> <li>8. Mass media event;</li> <li>9. Enhanced clean delivery kit supplies</li> <li>10. Advocacy training for men;</li> <li>11. Forum of mothers-in-law;</li> <li>12. Upgrade primary care facilities;</li> <li>13. Links with pastoralist / remote communities.</li> </ol> | <ol style="list-style-type: none"> <li>1. Institutional Strengthening;</li> <li>2. Capacity development for Frontline Organisations;</li> <li>3. Enhance MNCH value network;</li> <li>4. Enhance Civil Society Organisation/ Government Collaboration</li> <li>5. Build and support a TBA Forum.</li> </ol> | <ol style="list-style-type: none"> <li>1. Family conversations;</li> <li>2. Participatory community quality improvement;</li> <li>3. Community solutions fund;</li> <li>4. Anchors;</li> <li>5. Health Extension Worker training and supervision;</li> <li>6. Health Development Army training;</li> <li>7. Non-financial incentives for Health Development Army volunteers;</li> <li>8. Family Health Card;</li> <li>9. Improved referral linkages;</li> <li>10. Community-based data for decision-making.</li> </ol> | <ol style="list-style-type: none"> <li>1. Behaviour change communication strategy;</li> <li>2. CMNH Family Meetings, community gatherings.</li> <li>3. MNH care package;</li> <li>4. Frontline worker team development;</li> <li>5. Performance monitoring for quality improvement.</li> </ol> | <ol style="list-style-type: none"> <li>1. Enhance MNH profile in the community;</li> <li>2. MNH awareness in community structures</li> <li>3. Health Development Army training;</li> <li>4. Health Extension Worker training;</li> <li>5. Community-based administration of antibiotics.</li> <li>6. Health Extension Worker / Health Development Army linkages.</li> </ol> | <ol style="list-style-type: none"> <li>1. Safe Childbirth Checklist</li> <li>2. Safe Childbirth Checklist training and supervision.</li> </ol> | <ol style="list-style-type: none"> <li>1. Auxiliary nurse-midwife training in skilled birth attendance</li> <li>2. mSakhi phone app;</li> <li>3. mSakhi home based newborn care phone app</li> <li>4. Emergency transport scheme</li> <li>5. Mother and child tracking system.</li> </ol> | <ol style="list-style-type: none"> <li>1. 1<sup>st</sup> hour campaign;</li> <li>2. Mothers' groups;</li> <li>3. Letter to my father</li> <li>Revitalise Village Health &amp; Sanitation Committees</li> <li>5. Accredited Social Health Activist (ASHA) mentoring and supportive supervision</li> <li>6. Recognise good performance of ASHAs and Village Health and Sanitation Committees</li> <li>7. ASHA toolkit</li> <li>8. NGO partnership architecture.</li> </ol> | <ol style="list-style-type: none"> <li>1. Diffusion of MNCH practice;</li> <li>2. Capacity building of the self-help groups / federations in RMNCHN.</li> <li>3. Capacity building of Self-Help Groups (SHGs) and federations;</li> <li>4. SHG-health system links;</li> <li>5. Scale-up model;</li> <li>6. Community-managed monitoring, learning and evidence-based decision-making;</li> <li>7. Self Help Group-health system links.</li> </ol> |

**Table A2. Characterisation Society for Family Health, 2014. Innovation nature, scope and timing.**

| Innovation                                                       | Q1. What is the nature of the innovation?                                                                                                                                                                                                                                                                                                                                                                                       |                                                                                                                                                                                                                                                                                                                                                                                                                                                                                                 |                                                                                                                                                                                                                                                                                                                                                                                                                                                                                                                                                | Q2. What is the scope and timing of the innovation?                                                                                                                                                                                                                                |
|------------------------------------------------------------------|---------------------------------------------------------------------------------------------------------------------------------------------------------------------------------------------------------------------------------------------------------------------------------------------------------------------------------------------------------------------------------------------------------------------------------|-------------------------------------------------------------------------------------------------------------------------------------------------------------------------------------------------------------------------------------------------------------------------------------------------------------------------------------------------------------------------------------------------------------------------------------------------------------------------------------------------|------------------------------------------------------------------------------------------------------------------------------------------------------------------------------------------------------------------------------------------------------------------------------------------------------------------------------------------------------------------------------------------------------------------------------------------------------------------------------------------------------------------------------------------------|------------------------------------------------------------------------------------------------------------------------------------------------------------------------------------------------------------------------------------------------------------------------------------|
|                                                                  | Description                                                                                                                                                                                                                                                                                                                                                                                                                     | Purpose                                                                                                                                                                                                                                                                                                                                                                                                                                                                                         | Project Activities                                                                                                                                                                                                                                                                                                                                                                                                                                                                                                                             |                                                                                                                                                                                                                                                                                    |
| 1. Mapping of service users and provision                        | <p>Innovation to enhance existing government mapping of facilities to include element of quality of care (approved facilities).<br/>                     Maps &amp; database of approved facilities &amp; trained FLWs made available to Call Centre staff.<br/>                     FLWs given information on closest appropriate approved facilities.<br/>                     Map telecom coverage in intervention area.</p> | <p>To enhance quality of referral, by making mapping information available to FLWs, families and the community on appropriate referral facilities in the area.<br/>                     To increase contact with FLW by informing families / community of trained FLW in the area.<br/>                     To enhance effectiveness and efficiency of referral.<br/>                     To ease access to the Call Centre each community has appropriate SIM card for free-phone contact.</p> | <p><b>Develop:</b> Maps and a database for use by Call Centre staff, TBAs and FOMWAN.<br/> <b>Equip:</b> FLWs with community-specific information; Call Centre staff with maps and a database of approved facilities and trained FLWs.<br/> <b>Train and support:</b> Call Centre staff in using the maps and database; FLWs in using community-specific information; On-going support by up-dating database every 2 years<br/>                     FLW up-dated on new information through supervision and quarterly review meetings.</p>     | Whole of Gombe State. Started 2010, ongoing.                                                                                                                                                                                                                                       |
|                                                                  |                                                                                                                                                                                                                                                                                                                                                                                                                                 |                                                                                                                                                                                                                                                                                                                                                                                                                                                                                                 |                                                                                                                                                                                                                                                                                                                                                                                                                                                                                                                                                | Q3. What type of enhancement in contacts is anticipated as a result of the innovation?                                                                                                                                                                                             |
|                                                                  |                                                                                                                                                                                                                                                                                                                                                                                                                                 |                                                                                                                                                                                                                                                                                                                                                                                                                                                                                                 |                                                                                                                                                                                                                                                                                                                                                                                                                                                                                                                                                | <p><b>Frequency:</b> Access to Call Centre and thereby to referral facilities, access to nearby, trained FLWs through the Call Centre<br/> <b>Equity:</b> New information is available on location of pastoralist / remote communities, which might otherwise not access care.</p> |
| 2. Train and deploy skilled Traditional Birth Attendants (rural) | <p>Prepare and deploy a community-based cadre of rural FLW to</p> <ul style="list-style-type: none"> <li>* promote ANC, identify danger signs in pregnancy and refer appropriately</li> <li>* offer clean delivery care, identify danger signs and facilitate appropriate referral</li> <li>* undertake post-partum checks of the mother and newborn, identify danger signs and facilitate appropriate referral.</li> </ul>     | <p>To increase contact between FLW and pregnant, delivering and postnatal women and newborns in all communities.<br/>                     To enhance the cleanliness of home-based delivery care.<br/>                     To enhance identification of danger signs in pregnancy, delivery and post-partum and refer in a timely and appropriate way.<br/>                     To increase and enhance coverage of post-natal checks and appropriate referral of the mother and baby.</p>      | <p><b>Develop:</b> Training and deployment programme; training manual; recording system; supervision and support system.<br/> <b>Equip:</b> Project staff have training manual and recording system; FLWs have the toolkit including appropriate data-collection tools (see SFH innovation 4); uniform for easy identification.<br/> <b>Train and support:</b> FLWs have 5 days' training (in Phase 2 increased to 6 days) followed by monthly supervision visits by project staff; quarterly review meetings with MoH and SFH management.</p> | Q2. What is the scope and timing of the innovation?                                                                                                                                                                                                                                |
|                                                                  |                                                                                                                                                                                                                                                                                                                                                                                                                                 |                                                                                                                                                                                                                                                                                                                                                                                                                                                                                                 |                                                                                                                                                                                                                                                                                                                                                                                                                                                                                                                                                | Phase I: initially with six Local Government Areas – June 2010 ongoing. Phase II: All rural Gombe State – September 2010 ongoing.                                                                                                                                                  |
|                                                                  |                                                                                                                                                                                                                                                                                                                                                                                                                                 |                                                                                                                                                                                                                                                                                                                                                                                                                                                                                                 |                                                                                                                                                                                                                                                                                                                                                                                                                                                                                                                                                | Q3. What type of enhancement in contacts is anticipated as a result of the innovation?                                                                                                                                                                                             |
|                                                                  |                                                                                                                                                                                                                                                                                                                                                                                                                                 |                                                                                                                                                                                                                                                                                                                                                                                                                                                                                                 |                                                                                                                                                                                                                                                                                                                                                                                                                                                                                                                                                | <p><b>Frequency:</b> FLWs generate interest in MNH, promote facility care<br/> <b>Quality:</b> Enhanced MNH knowledge and practice including delivery care (TBAs)<br/> <b>Equity:</b> FLWs deployed in under-served communities</p>                                                |

**Table A2. continued. Characterisation Questions 1, 2 and 3. Society for Family Health, 2014.**

| Innovation                                       | Q1. What is the nature of the innovation?                                                                                                                                                                                                                                                                                                                                                                                                                                                                                                                                                             |                                                                                                                                                                                                                                                                                                                                                                                                                                                                                                                                                |                                                                                                                                                                                                                                                                                                                                                                                                                                                                                                                                                                                                                                                                                                                                           | Q2. What is the scope and timing of the innovation?                                                                                                                                                                                                                                                                                                          |
|--------------------------------------------------|-------------------------------------------------------------------------------------------------------------------------------------------------------------------------------------------------------------------------------------------------------------------------------------------------------------------------------------------------------------------------------------------------------------------------------------------------------------------------------------------------------------------------------------------------------------------------------------------------------|------------------------------------------------------------------------------------------------------------------------------------------------------------------------------------------------------------------------------------------------------------------------------------------------------------------------------------------------------------------------------------------------------------------------------------------------------------------------------------------------------------------------------------------------|-------------------------------------------------------------------------------------------------------------------------------------------------------------------------------------------------------------------------------------------------------------------------------------------------------------------------------------------------------------------------------------------------------------------------------------------------------------------------------------------------------------------------------------------------------------------------------------------------------------------------------------------------------------------------------------------------------------------------------------------|--------------------------------------------------------------------------------------------------------------------------------------------------------------------------------------------------------------------------------------------------------------------------------------------------------------------------------------------------------------|
|                                                  | Description                                                                                                                                                                                                                                                                                                                                                                                                                                                                                                                                                                                           | Purpose                                                                                                                                                                                                                                                                                                                                                                                                                                                                                                                                        | Project Activities                                                                                                                                                                                                                                                                                                                                                                                                                                                                                                                                                                                                                                                                                                                        |                                                                                                                                                                                                                                                                                                                                                              |
| 3. Train and deploy community volunteers (urban) | <p>Prepare, train and deploy community-based urban FLW to</p> <ul style="list-style-type: none"> <li>* promote antenatal care and facility deliveries, key messages on clean birth practices, effective post-partum care of the mother and newborn.</li> <li>* identify danger signs and facilitate appropriate referral (using Call Centre and Emergency Transport Scheme).</li> <li>* undertake post-partum checks of the mother and newborn.</li> </ul>                                                                                                                                            | <p>To increase and enhance home-based contact between FLW and families in all communities.</p> <p>To raise awareness of key MNH messages.</p> <p>To enhance appropriate referral for pregnant and delivering women and for newborns.</p> <p>To increase demand for facility-based antenatal and PN care</p> <p>To increase the proportion of facility deliveries</p> <p>To increase and enhance coverage of PP checks and appropriate referral of the mother and baby.</p>                                                                     | <p><b>Develop:</b> Training and deployment programme for FLWs, training manual; appropriate recording system; supervision and support system.</p> <p><b>Equip:</b> Project staff have training manual and recording system; FLWs with the toolkit including appropriate data-collection tools (see SFH innovation 4); uniform clothing items for easy identification.</p> <p><b>Train and support:</b> 3day training (to be increased to 5 days); monthly supervision visits by project staff and quarterly review meetings with MoH and SFH management.</p>                                                                                                                                                                              | All urban centres. June 2010 ongoing                                                                                                                                                                                                                                                                                                                         |
|                                                  |                                                                                                                                                                                                                                                                                                                                                                                                                                                                                                                                                                                                       |                                                                                                                                                                                                                                                                                                                                                                                                                                                                                                                                                |                                                                                                                                                                                                                                                                                                                                                                                                                                                                                                                                                                                                                                                                                                                                           | <p>Q3. What type of enhancement in contacts is anticipated as a result of the innovation?</p> <p><b>Frequency:</b> FLWs generate interest in MNH, promote facility care</p> <p><b>Quality:</b> FLW training enhances MNH knowledge and practice.</p> <p><b>Equity:</b> FLWs deployed in all communities including pastoralist / remote and poorly-served</p> |
| 4. Frontline workers' toolkit                    | <p>Toolkit comprises equipment to facilitate FLW access to homes and enhance their performance: equipment to help access in adverse weather conditions and in the dark; a flipchart of essential information for FLWs to use for FLWs' own information and to impart key messages to community members; a foot-length ruler; containers with stickers indicating key MNH events and outcomes (e.g. delivery, delivery outcome, referral, postnatal visit) in which non-literate FLWs place pebbles as a way of keeping a tally of their work, data are collected at monthly supervision meetings.</p> | <p>To enable FLWs to impart information to families in a standardised and well-informed way.</p> <p>To help FLWs give coherent and consistent messages.</p> <p>To help FLWs plan and manage home visits for MNH care.</p> <p>Foot length ruler to help identify premature babies in need of special care.</p> <p>Containers with stickers to enhance data collection among non-literate FLWs on number of pregnant women reached and referred, deliveries conducted, and to enhance data quality and thereby effective project management.</p> | <p><b>Develop:</b> Toolkit - flipchart with MNH information for FLW, mother and family; guidance on imparting key messages effectively; cell phone, torch, umbrella, rain boots; foot-length rule for newborns; containers and pebbles to track work of less literate FLWs</p> <p><b>Equip:</b> FLWs receive toolkit; less literate FLWs receive jars with stickers to log major MNH events and outcomes</p> <p><b>Train and support:</b> FLWs in toolkit use; FLWs have monthly supervision visits by project staff and quarterly review meetings with MoH and SFH management; train less literate FLWs to collect quality data; support FLWs through feedback at monthly meetings; refresher training at quarterly review meetings.</p> | Q2. What is the scope and timing of the innovation?                                                                                                                                                                                                                                                                                                          |
|                                                  |                                                                                                                                                                                                                                                                                                                                                                                                                                                                                                                                                                                                       |                                                                                                                                                                                                                                                                                                                                                                                                                                                                                                                                                |                                                                                                                                                                                                                                                                                                                                                                                                                                                                                                                                                                                                                                                                                                                                           | <p>Each FLW in Gombe State. Started June 2010, ongoing</p> <p>Q3. What type of enhancement in contacts is anticipated as a result of the innovation?</p> <p><b>Quality:</b> enhanced knowledge base of FLWs, better communication materials.</p>                                                                                                             |

**Table A2. continued. Characterisation Questions 1, 2 and 3. Society for Family Health, 2014.**

| Innovation                      | Q1. What is the nature of the innovation?                                                                                                                                                                                                                                                                                                                                               |                                                                                                                                                                                                                                                                                                                                                                          |                                                                                                                                                                                                                                                                                                                                                                                                                                                                                                                                                                                                                                                                                                                                                                                              | Q2. What is the scope and timing of the innovation?                                                                                                                                                                                                                  |
|---------------------------------|-----------------------------------------------------------------------------------------------------------------------------------------------------------------------------------------------------------------------------------------------------------------------------------------------------------------------------------------------------------------------------------------|--------------------------------------------------------------------------------------------------------------------------------------------------------------------------------------------------------------------------------------------------------------------------------------------------------------------------------------------------------------------------|----------------------------------------------------------------------------------------------------------------------------------------------------------------------------------------------------------------------------------------------------------------------------------------------------------------------------------------------------------------------------------------------------------------------------------------------------------------------------------------------------------------------------------------------------------------------------------------------------------------------------------------------------------------------------------------------------------------------------------------------------------------------------------------------|----------------------------------------------------------------------------------------------------------------------------------------------------------------------------------------------------------------------------------------------------------------------|
|                                 | Description                                                                                                                                                                                                                                                                                                                                                                             | Purpose                                                                                                                                                                                                                                                                                                                                                                  | Project Activities                                                                                                                                                                                                                                                                                                                                                                                                                                                                                                                                                                                                                                                                                                                                                                           |                                                                                                                                                                                                                                                                      |
| 5. Financial Incentives for FLW | <p>Performance-based financing. A system of financial incentives / rewards for FLWs who accompany women to a facility for delivery care or who refer a woman or newborn to a facility in response to danger signs.</p> <p>A parallel system of rewards to Local Government Area (LGA) recognising achievement in facility deliveries and facility-based management of referrals.</p>    | <p>To increase proportion of women delivering in a facility.</p> <p>To enhance timely and effective referral.</p>                                                                                                                                                                                                                                                        | <p><b>Develop:</b> Comparative scoring system to (a) identify LGAs with good record of facility delivery; (b) FLWs with good record of accompanying women for facility delivery; facility-based system to record deliveries accompanied by FLWs; system of remunerating TBAs.</p> <p><b>Equip:</b> Facilities have stamps verifying that TBA has accompanied a woman for facility delivery. TBAs have forms to record referrals.</p> <p><b>Train and support:</b> Notify LGAs, facilities and FLWs of the scheme; train all actors in how best to record women in labour / with danger signs accompanied by FLW.</p>                                                                                                                                                                         | 10 of the 11 Local Government Areas in Gombe State (excludes Gombe Town). Started June 2010, ongoing.                                                                                                                                                                |
|                                 |                                                                                                                                                                                                                                                                                                                                                                                         |                                                                                                                                                                                                                                                                                                                                                                          |                                                                                                                                                                                                                                                                                                                                                                                                                                                                                                                                                                                                                                                                                                                                                                                              | Q3. What type of enhancement in contacts is anticipated as a result of the innovation?                                                                                                                                                                               |
|                                 |                                                                                                                                                                                                                                                                                                                                                                                         |                                                                                                                                                                                                                                                                                                                                                                          |                                                                                                                                                                                                                                                                                                                                                                                                                                                                                                                                                                                                                                                                                                                                                                                              | <b>Frequency:</b> FLWs are rewarded for accompanying women to facilities for delivery                                                                                                                                                                                |
| 6. Call Centre                  | <p>A free-phone Call Centre staffed by trained health providers offers information to community-based providers, pregnant women and families. Links pregnant or delivering women with community-based providers and with the Emergency Transport Scheme. Promotes facility-based care.</p> <p>PROSPECTIVELY to include malaria / family planning and other broader MNCH information</p> | <p>To make information on MNH accessible to members of all communities.</p> <p>To provide information on safe practice in pregnancy, delivery and the post-partum period to women, families and FLWs.</p> <p>To increase proportion of women delivering in a facility</p> <p>To increase proportion of women accessing ANC and PNC</p> <p>To enhance timely referral</p> | <p><b>Develop:</b> Call Centre; database on trained providers; SOPs for giving information and advice; information leaflets; publicity bill-boards and cards; mass media and radio messages</p> <p><b>Equip:</b> Call Centre has reliable telephone technology; Call Centre staff has hard copies of SOPs; community has publicity and information on the Call Centre; FLWs and targeted communities have appropriate SIM cards for reliable access to the Call Centre (builds on Innovation 1: mapping).</p> <p><b>Train and support:</b> Call Centre staff in using telephone technology, database and in following SOPs; FLWs in accessing the Call Centre; Monthly and quarterly team meetings to support Call Centre staff, e.g. feedback from exit interviews and mystery callers.</p> | Q2. What is the scope and timing of the innovation?                                                                                                                                                                                                                  |
|                                 |                                                                                                                                                                                                                                                                                                                                                                                         |                                                                                                                                                                                                                                                                                                                                                                          |                                                                                                                                                                                                                                                                                                                                                                                                                                                                                                                                                                                                                                                                                                                                                                                              | One Call Centre for Gombe, started Sept 2010, ongoing. Enhanced Call Centre prospective.                                                                                                                                                                             |
|                                 |                                                                                                                                                                                                                                                                                                                                                                                         |                                                                                                                                                                                                                                                                                                                                                                          |                                                                                                                                                                                                                                                                                                                                                                                                                                                                                                                                                                                                                                                                                                                                                                                              | Q3. What type of enhancement in contacts is anticipated as a result of the innovation?                                                                                                                                                                               |
|                                 |                                                                                                                                                                                                                                                                                                                                                                                         |                                                                                                                                                                                                                                                                                                                                                                          |                                                                                                                                                                                                                                                                                                                                                                                                                                                                                                                                                                                                                                                                                                                                                                                              | <p><b>Frequency:</b> Easier and more frequent contact with CC and other FLWs</p> <p><b>Quality:</b> By training Call Centre staff, information and advice for families and FLWs is improved, enhanced response to danger signs - appropriate and timely referral</p> |

**Table A2. continued. Characterisation Questions 1, 2 and 3. Society for Family Health, 2014.**

| Innovation                                                                                                                                                                                                                             | Q1. What is the nature of the innovation?                                                                                                                                                                                                                                                                                                                                                                                                                                                                                                                       |                                                                                                                                                                                                                   |                                                                                                                                                                                                                                                                                                                                                                                                                                                                                                                                                                                                                            | Q2. What is the scope and timing of the innovation?                                                                                                 |
|----------------------------------------------------------------------------------------------------------------------------------------------------------------------------------------------------------------------------------------|-----------------------------------------------------------------------------------------------------------------------------------------------------------------------------------------------------------------------------------------------------------------------------------------------------------------------------------------------------------------------------------------------------------------------------------------------------------------------------------------------------------------------------------------------------------------|-------------------------------------------------------------------------------------------------------------------------------------------------------------------------------------------------------------------|----------------------------------------------------------------------------------------------------------------------------------------------------------------------------------------------------------------------------------------------------------------------------------------------------------------------------------------------------------------------------------------------------------------------------------------------------------------------------------------------------------------------------------------------------------------------------------------------------------------------------|-----------------------------------------------------------------------------------------------------------------------------------------------------|
|                                                                                                                                                                                                                                        | Description                                                                                                                                                                                                                                                                                                                                                                                                                                                                                                                                                     | Purpose                                                                                                                                                                                                           | Project Activities                                                                                                                                                                                                                                                                                                                                                                                                                                                                                                                                                                                                         |                                                                                                                                                     |
| 7. Emergency Transport Scheme (ETS)                                                                                                                                                                                                    | Scheme run through the NURTW <sup>1</sup> officers to offer low-cost or free transport to a referral centre. Mobile Park Managers train volunteer drivers in: lift and transport women, use standard reporting format; quick repairs to vehicles; traffic regulations. Trained drivers become peer educators, train and recruit additional drivers. Families, FLWs <sup>2</sup> or the Call Centre can contact the drivers. Some have car stickers for easy ID. Drivers rewarded by priority loading at transport park, sometimes fuel, community appreciation. | To facilitate timely access to the appropriate referral centre for normal delivery or in response to danger signs (mother and newborn).<br>To render facility-based care accessible to members of all communities | <p><b>Develop:</b> ETS system in collaboration with NURTW<sup>1</sup>; Management Information System; ETS training curriculum and training materials; job-aid for drivers; log-book; IEC materials; car stickers</p> <p><b>Equip:</b> Drivers with IEC materials, stickers and information packs; mobile park managers with recording documents; peer educators with training materials/ log books</p> <p><b>Train and support:</b> Inform NURTW, mobile park managers and drivers about the scheme; train drivers in safe MNH; train and support peer-educators to pass on MNH information and to recruit new drivers</p> | At least one transport park per Local Government Area in Gombe State. Started Sept 2010, ongoing.                                                   |
|                                                                                                                                                                                                                                        |                                                                                                                                                                                                                                                                                                                                                                                                                                                                                                                                                                 |                                                                                                                                                                                                                   |                                                                                                                                                                                                                                                                                                                                                                                                                                                                                                                                                                                                                            | Q3. What type of enhancement in contacts is anticipated as a result of the innovation?                                                              |
|                                                                                                                                                                                                                                        |                                                                                                                                                                                                                                                                                                                                                                                                                                                                                                                                                                 |                                                                                                                                                                                                                   |                                                                                                                                                                                                                                                                                                                                                                                                                                                                                                                                                                                                                            | <p><b>Frequency:</b> Women / newborns with complications reach facility</p> <p><b>Equity:</b> Free service, can benefit most remote communities</p> |
| 8. Mass media event                                                                                                                                                                                                                    | SFH works through an agency to develop and air radio spots to promote MNH concepts, the Call Centre and facility delivery.<br>Billboards promote the Call Centre and publicise contact telephone numbers among community member.<br>Mid-mass media, leaflets & posters on Call Centre, publicise in the community, key messages on MNH                                                                                                                                                                                                                          | To promote the work of the Call Centre and the Emergency Transport Scheme.<br>To promote key MNH messages and facility delivery.<br>To enhance the community's knowledge base on MNH.                             | <p><b>Develop:</b> Mass media event including radio messages / jingles, bill-boards, posters, stickers and leaflets.</p> <p><b>Equip:</b> Radio houses with recorded jingles; FLWs and Emergency Transport Scheme drivers with stickers and posters; at bi-annual the MNCH week distribute posters, leaflets and stickers.</p> <p><b>Train and support:</b> FLWs are trained in how to use new communications materials.</p>                                                                                                                                                                                               | Q2. What is the scope and timing of the innovation?                                                                                                 |
|                                                                                                                                                                                                                                        |                                                                                                                                                                                                                                                                                                                                                                                                                                                                                                                                                                 |                                                                                                                                                                                                                   |                                                                                                                                                                                                                                                                                                                                                                                                                                                                                                                                                                                                                            | All Gombe State. September 2010, ongoing.                                                                                                           |
|                                                                                                                                                                                                                                        |                                                                                                                                                                                                                                                                                                                                                                                                                                                                                                                                                                 |                                                                                                                                                                                                                   |                                                                                                                                                                                                                                                                                                                                                                                                                                                                                                                                                                                                                            | Q3. What type of enhancement in contacts is anticipated as a result of the innovation?                                                              |
| <p><b>Frequency:</b> Increased awareness and more use of Call Centre, and thereby FLWs and ETS</p> <p><b>Equity:</b> Use of radio - can be heard by everyone, no cost, most benefit to the poor</p>                                    |                                                                                                                                                                                                                                                                                                                                                                                                                                                                                                                                                                 |                                                                                                                                                                                                                   |                                                                                                                                                                                                                                                                                                                                                                                                                                                                                                                                                                                                                            |                                                                                                                                                     |
| 9. Access to cheaper clean delivery kits                                                                                                                                                                                               | A social marketing innovation to make Clean Delivery Kits available at reduced cost through TBAs and FOMWAN volunteers (and Patent medicine vendors in the learning phase).                                                                                                                                                                                                                                                                                                                                                                                     | To enhance clean delivery when delivery takes place in the home, through the use of clean delivery kits.                                                                                                          | <p><b>Develop:</b> Revised clean delivery kit package; training guide and reference material for each FLW cadre (Patent medicine vendors, TBAs, and FOMWAN).</p> <p><b>Equip:</b> FLWs with the clean delivery kit and guides.</p> <p><b>Train and support:</b> As part of routine FLW training, train in the use of the clean delivery kit and reference material; Support TBAs, and FOMWAN volunteers by following up during review meetings; monitor distribution of clean delivery kits and give feedback.</p>                                                                                                         | Q2. What is the scope and timing of the innovation?                                                                                                 |
|                                                                                                                                                                                                                                        |                                                                                                                                                                                                                                                                                                                                                                                                                                                                                                                                                                 |                                                                                                                                                                                                                   |                                                                                                                                                                                                                                                                                                                                                                                                                                                                                                                                                                                                                            | Every Local Government Area. Phase I June 2010 – 2012. Phase II: 2012 – 2014                                                                        |
|                                                                                                                                                                                                                                        |                                                                                                                                                                                                                                                                                                                                                                                                                                                                                                                                                                 |                                                                                                                                                                                                                   |                                                                                                                                                                                                                                                                                                                                                                                                                                                                                                                                                                                                                            | Q3. What type of enhancement in contacts is anticipated as a result of the innovation?                                                              |
| <p><b>Frequency:</b> People will buy the clean delivery kits if they are less expensive - more contact with Patent medicine vendors</p> <p><b>Equity:</b> Poorest least likely to afford/ access standard-cost clean delivery kits</p> |                                                                                                                                                                                                                                                                                                                                                                                                                                                                                                                                                                 |                                                                                                                                                                                                                   |                                                                                                                                                                                                                                                                                                                                                                                                                                                                                                                                                                                                                            |                                                                                                                                                     |

<sup>1</sup> National Union of Road Transport Workers. <sup>2</sup> Frontline workers

**Table A3. Characterisation Society for Family Health, Nigeria, 2014.** Contacts between frontline workers and service users, showing: (Q4) How does the innovation enhance contact between frontline workers and service-users? and (Q5) Which life-saving interventions are anticipated to increase in coverage?

| <b>Contact between the Traditional Birth Attendant (TBA) and service-users</b>             |                                                                                                                                                                                                                             |                                                                                                                                                                                                                                                                                                      |                                                                                                                                     |                                                                                                                                                                                       |                                                                                                                                                        |
|--------------------------------------------------------------------------------------------|-----------------------------------------------------------------------------------------------------------------------------------------------------------------------------------------------------------------------------|------------------------------------------------------------------------------------------------------------------------------------------------------------------------------------------------------------------------------------------------------------------------------------------------------|-------------------------------------------------------------------------------------------------------------------------------------|---------------------------------------------------------------------------------------------------------------------------------------------------------------------------------------|--------------------------------------------------------------------------------------------------------------------------------------------------------|
|                                                                                            | <b>Traditional birth attendant and pregnant women</b>                                                                                                                                                                       | <b>Traditional birth attendant and women in labour</b>                                                                                                                                                                                                                                               | <b>Traditional birth attendant and new Mothers</b>                                                                                  | <b>Traditional birth attendant and newborns</b>                                                                                                                                       | <b>Traditional birth attendant and husbands/Families</b>                                                                                               |
| <b>Routine contact -&gt;</b>                                                               | ID pregnancy, informal ANC                                                                                                                                                                                                  | Delivery assistance                                                                                                                                                                                                                                                                                  | Occasional postpartum visit                                                                                                         | Occasional postnatal visit (rarely)                                                                                                                                                   | Occasional contact                                                                                                                                     |
| <b>Innovations enhancing this contact-&gt;</b>                                             | 1. Mapping of service users and provision; 2. Train and deploy TBA; 4. FLW toolkit; 8. Mass media event.                                                                                                                    | 1. Mapping of service users and provision; 2. Train and deploy TBA; 4.FLW toolkit; 5. Financial incentives; 6. Call Centre; 7. Emergency Transport Scheme; 9. Enhanced clean delivery kit supplies.                                                                                                  | 1. Mapping of service users and provision; 2. Train and deploy TBA; 4.FLW toolkit; 6. Call Centre; 7. Emergency Transport Scheme.   | 2. Train and deploy TBA; 4. FLW toolkit; 5. Financial Incentives; 6. Call Centre; 7. Emergency Transport Scheme; 9. Enhanced clean delivery kit supplies.                             | 1. Mapping of service users and provision; 2. Train and deploy TBA; 4.FLW toolkit; 6. Call Centre; 7. Emergency Transport Scheme; 8. Mass media event. |
| <b>Expected change in practice -&gt;</b>                                                   | More complete and more timely identification of pregnant women and registration for ANC. Enhanced delivery of key messages. Enhanced detection of danger signs and appropriate referral.                                    | More complete and timely referral to appropriate delivery facility. If TBA assists home delivery, appropriate use of clean delivery kit. Enhanced detection of danger signs and appropriate referral.                                                                                                | More complete and timely postpartum visit. Enhanced detection of danger signs, timely referral to appropriate facility if needed.   | More complete and timely postnatal visit. Enhanced detection of danger signs, timely referral to appropriate facility if needed.                                                      | More engagement of husbands and families in care at all stages                                                                                         |
| <b>Expected effect on coverage of life-saving interventions (Direct or Indirect) -&gt;</b> | INDIRECT: Identification of danger signs and appropriate referral. As a result, increased coverage of TT vaccine; Iron supplementation; Prevention of malaria; prevention and management of STIs including syphilis and HIV | DIRECT: Use clean delivery kit appropriately, e.g. hand washing with soap and use of gloves by delivery attendant.<br>INDIRECT: identify danger signs and appropriate referral, promote facility delivery, so prophylactic uterotonics to prevent PPH; management of PPH; AMTSL; access to c-section | DIRECT: Home-based PN care: detect and treat anaemia<br>INDIRECT: ID danger signs and appropriate referral, e.g. postpartum sepsis. | DIRECT: Home-based postnatal care: clean cord care; immediate breastfeeding; thermal care.<br>INDIRECT: detect newborn complications and refer appropriately. Exclusive breastfeeding | INDIRECT: Increased ANC, facility delivery, clean delivery, identify danger signs, and appropriate referral.                                           |

**Table A3. continued. Characterisation Questions 4 and 5. Society for Family Health, 2014.**

**Contact between the community volunteer and service users**

| Contact between frontline worker and service user ->                                       | Community volunteer and pregnant women                                                                                                                                                                              | Community volunteer and women in labour                                                                                                                                                                                                                                                                                                                 | Community volunteer and new Mothers                                                                                                                                                     | Community volunteer and newborns                                                                                                                                                                                             | Community volunteer and husbands/ families                                                                                                                              |
|--------------------------------------------------------------------------------------------|---------------------------------------------------------------------------------------------------------------------------------------------------------------------------------------------------------------------|---------------------------------------------------------------------------------------------------------------------------------------------------------------------------------------------------------------------------------------------------------------------------------------------------------------------------------------------------------|-----------------------------------------------------------------------------------------------------------------------------------------------------------------------------------------|------------------------------------------------------------------------------------------------------------------------------------------------------------------------------------------------------------------------------|-------------------------------------------------------------------------------------------------------------------------------------------------------------------------|
| <b>Routine contact -&gt;</b>                                                               | New cadre for MNH, no established contact.<br>Opportunistic contact                                                                                                                                                 | New cadre for MNH, no established contact.                                                                                                                                                                                                                                                                                                              | New cadre for MNH, no established contact.                                                                                                                                              | New cadre for MNH, no established contact.                                                                                                                                                                                   | New cadre for MNH, no established contact.<br>Opportunistic contact only.                                                                                               |
| <b>Innovations enhancing this contact-&gt;</b>                                             | 1. Mapping of service users and provision; 3. Train and deploy community volunteers; 4. FLW toolkit; 7. Mass media event.                                                                                           | 1. Mapping of service users and provision; 3. Train and deploy community volunteers 5. Call Centre; 6. Emergency Transport Scheme; 7. Mass media event;                                                                                                                                                                                                 | 1. Mapping of service users and provision; 3. Train and deploy community volunteer 4. FLW toolkit; 5. Call Centre; 6. Emergency Transport Scheme; 7. Mass media event;                  | 1. Mapping of service users and provision; 3. Train and deploy community volunteers 4. FLW toolkit; 5. Call Centre; 6. Emergency Transport Scheme; 7. Mass media event;                                                      | 1. Mapping of service users and provision; 3. Train and deploy community volunteers 4. FLW toolkit; 5. Call Centre; 6. Emergency Transport Scheme; 7. Mass media event; |
| <b>Expected change in practice -&gt;</b>                                                   | Complete and timely identification of pregnant women and registration for ANC. Effective delivery of key messages. Effective detection of danger signs and appropriate referral.                                    | Complete and timely referral to appropriate delivery facility. Effective detection of danger signs and appropriate referral.                                                                                                                                                                                                                            | Complete and timely postpartum visit. Detection of danger signs, timely referral to appropriate facility if needed.                                                                     | Complete and timely postnatal visit. Detection of danger signs, timely referral to appropriate facility if needed.                                                                                                           | Engagement of husbands and families in care at all stages                                                                                                               |
| <b>Expected effect on coverage of life-saving interventions (Direct or Indirect) -&gt;</b> | INDIRECT: ID pregnancy; home visit, promote ANC; identify danger signs and appropriate referral. TT vaccine; Iron supplementation; malaria prevention; prevention and management of STIs including syphilis and HIV | INDIRECT: Promote facility delivery; family has access to clean delivery kit; identify danger signs and appropriate referral. For facility delivery prophylactic uterotonics to prevent PPH, management of PPH, AMTSL, access to C-sections. For home delivery: clean delivery including hand washing with soap and use of gloves by delivery attendant | DIRECT: Detect and treat maternal anaemia.<br>INDIRECT: Postpartum visit, ID danger signs and appropriate referral. Detect danger signs e.g. post-partum sepsis and refer appropriately | Postnatal visit, ID danger signs and appropriate referral.<br>Home-based postnatal care so clean cord care; immediate and exclusive breastfeeding; thermal care; detection of newborn complications and appropriate referral | Promote ANC, facility delivery, postnatal care of mother and NB.                                                                                                        |

**Table A3. continued. Characterisation Questions 4 and 5. Society for Family Health, 2014.**

**Contact between Call Centre staff and service users**

|                                                                                            | <b>Call Centre staff and pregnant women</b>                                                                                                                                      | <b>Call Centre staff and women in labour</b>                                                                                                                                     | <b>Call Centre staff and new Mothers</b>                                                                                                                                         | <b>Call Centre staff and newborns</b>                                                                                                                                                                              | <b>Call Centre staff and husbands/ families</b>                                                                                                                                  |
|--------------------------------------------------------------------------------------------|----------------------------------------------------------------------------------------------------------------------------------------------------------------------------------|----------------------------------------------------------------------------------------------------------------------------------------------------------------------------------|----------------------------------------------------------------------------------------------------------------------------------------------------------------------------------|--------------------------------------------------------------------------------------------------------------------------------------------------------------------------------------------------------------------|----------------------------------------------------------------------------------------------------------------------------------------------------------------------------------|
| <b>Routine contact -&gt;</b>                                                               | New cadre, no established contact.                                                                                                                                                                                 | New cadre, no established contact.                                                                                                                                               |
| <b>Innovations enhancing this contact-&gt;</b>                                             | 1. Mapping of service users and provision; 2. Train and deploy TBA; 3. Train and deploy community volunteer; 5. Call Centre; 6. Emergency Transport Scheme; 7. Mass media event. | 1. Mapping of service users and provision; 2. Train and deploy TBA; 3. Train and deploy community volunteer; 5. Call Centre; 6. Emergency Transport Scheme; 7. Mass media event. | 1. Mapping of service users and provision; 2. Train and deploy TBA; 3. Train and deploy community volunteer; 5. Call Centre; 6. Emergency Transport Scheme; 7. Mass media event. | 1. Mapping of service users and provision; 2. Train and deploy TBA; 3. Train and deploy community volunteer; 5. Call Centre; 6. Emergency Transport Scheme; 7. Mass media event.                                   | 1. Mapping of service users and provision; 2. Train and deploy TBA; 3. Train and deploy community volunteer; 5. Call Centre; 6. Emergency Transport Scheme; 7. Mass media event. |
| <b>Expected change in practice -&gt;</b>                                                   | Effective delivery of advice on danger signs, uptake of professional care, appropriate response to danger signs in pregnancy                                                     | Effective delivery of advice on danger signs, uptake of professional care, appropriate response to danger signs in labour                                                        | Effective delivery of advice on danger signs, uptake of professional care, appropriate response to postpartum danger signs                                                       | Effective delivery of advice on danger signs, uptake of professional care, appropriate response to postnatal danger signs                                                                                          | Effective delivery of advice on danger signs, uptake of professional care, appropriate response to danger signs at all stages                                                    |
| <b>Expected effect on coverage of life-saving interventions (Direct or Indirect) -&gt;</b> | Information, advice and promotion of ANC so INDIRECTLY TT vaccine, iron supplementation, prevention of malaria, prevention and management of STIs including syphilis and HIV     | Advise families to identify danger signs and appropriate referral<br>INDIRECTLY all intrapartum critical interventions                                                           | Advise families to identify danger signs and appropriate referral                                                                                                                | Information, advice and promotion of postnatal care of newborn so indirect danger signs and refer appropriately<br>INDIRECTLY Clean cord care, thermal care; detection and appropriate management of complications | Information, advice and promotion of ANC, facility delivery, identify danger signs, postnatal care of mother and newborn so<br>INDIRECTLY, all critical interventions            |



**Table A3. continued. Characterisation Questions 4 and 5. Society for Family Health, 2014.**

**Contact between Patent Medicine Vendors and service users**

|                                                                                            | <b>Patent medicine vendors and pregnant women</b>            | <b>Patent medicine vendors and women in labour</b>                        | <b>Patent medicine vendors and new mothers</b> | <b>Patent medicine vendors and newborns</b> | <b>Patent medicine vendors and husbands/ families</b> |
|--------------------------------------------------------------------------------------------|--------------------------------------------------------------|---------------------------------------------------------------------------|------------------------------------------------|---------------------------------------------|-------------------------------------------------------|
| <b>Routine contact -&gt;</b>                                                               | Pregnant women buy standard cost Clean Delivery Kits         | No routine contact.                                                       | No routine contact.                            | No routine contact.                         | No routine contact.                                   |
| <b>Innovations enhancing this contact-&gt;</b>                                             | 8. Mass media event; 9. Enhanced clean delivery kit supplies |                                                                           |                                                |                                             |                                                       |
| <b>Expected change in practice -&gt;</b>                                                   | Low cost clean delivery kits available                       |                                                                           |                                                |                                             |                                                       |
| <b>Expected effect on coverage of life-saving interventions (Direct or Indirect) -&gt;</b> |                                                              | INDIRECT: Hand washing with soap and use of gloves by delivery attendant. |                                                | INDIRECT: Clean cord care.                  |                                                       |
